# Supplementary material for: SALL3 mediates the loss of neuroectodermal differentiation potential in human embryonic stem cells with chromosome 18q loss
Source: Research Square preprint supplement (doi:10.21203/rs.3.rs-3100381/v1), 2023-07-28
Supplement: Supplementary file 1 [file 75f4552264370273cca1857a.xlsx]

## Sheet: common_all
	hESCdel18q_vs_hESCWT		hESCWT-SALL3KD_vs_hESCWT		hESCdel18qSALL3OE_vs_hESCdel18q
	logFC	FDR	logFC	FDR	logFC	FDR
MAP3K14	2.9312	1.78971e-09	2.27621	2.49462e-07	-2.5583	8.99337e-09
CX3CL1	2.63956	3.11423e-07	2.63611	0.000254322	-2.92955	9.11691e-10
TNFRSF12A	2.2013	1.28018e-12	1.93017	3.92603e-08	-2.15571	8.5622e-11
MCOLN3	2.58847	2.74465e-09	2.44682	1.85962e-08	-2.03161	7.03695e-08
PRDM1	1.49528	0.0121064	1.67592	0.00776871	-1.19125	0.000142228
PDE4A	1.37111	0.000338186	1.11692	0.00114165	-1.14324	1.08642e-07
RASGRP2	1.51896	8.1277e-05	1.08614	0.00209974	-1.16708	1.8857e-07
MNT	1.24241	1.4755e-08	1.01623	7.39256e-08	-1.17188	2.77118e-09
SYNJ2	1.13095	3.67611e-07	1.43565	5.70858e-08	-1.26008	1.1147e-09
GADD45B	2.92135	5.49284e-08	1.99529	1.24565e-06	-1.6643	2.10344e-09
PDGFB	3.65097	5.29811e-06	3.9322	1.24565e-06	-4.45981	1.16365e-07
IL2RB	1.87171	0.00273986	1.89607	0.0014587	-1.55712	0.000221738
NKAIN4	1.2037	0.000344407	1.26115	0.000251601	-1.16815	1.38707e-06
SMAD7	2.15766	1.53209e-06	1.41128	0.000250193	-1.6443	1.30825e-10
GPR50	3.59489	9.9643e-08	3.1224	7.49678e-05	-2.24163	5.22002e-08
HAS3	1.39942	3.90983e-08	2.54433	2.97665e-09	-1.77465	7.37862e-09
TGFB1	1.44528	6.78357e-07	1.53318	2.49462e-07	-1.3741	8.49772e-08
FAM83E	1.52937	4.7037e-06	1.08682	0.000338539	-1.67575	2.75603e-07
LFNG	1.63512	9.54921e-08	1.62203	5.02247e-07	-1.68569	9.19329e-09
SERPINE1	3.72565	2.45842e-07	3.79006	2.01935e-07	-2.65366	1.98936e-07
WNT3	3.2842	2.15396e-07	2.44457	0.000135378	-3.46236	3.52206e-12
LOC101929777	3.2842	2.15396e-07	2.44457	0.000135378	-3.46236	3.52206e-12
RASD1	1.35247	0.000452033	1.29627	0.0095896	-1.42651	3.03089e-06
KLF3	1.03239	3.4682e-07	1.14684	4.14612e-06	-1.08112	3.53915e-08
SH2B3	1.82273	1.82702e-07	1.40398	2.46143e-06	-1.55668	1.80509e-09
KCNA1	4.78094	3.02849e-12	3.60972	9.73593e-07	-4.1054	1.39841e-10
ITK	4.11993	0.000143582	3.28513	0.00208026	-3.55042	1.82774e-06
AMOTL2	2.11819	3.95083e-05	1.19623	0.00426363	-2.2792	4.99105e-09
KAT2B	1.72423	2.03134e-05	1.77639	8.36331e-06	-1.93247	5.06382e-08
HES1	2.84785	6.9688e-10	1.68274	7.83536e-06	-3.48977	3.52206e-12
ANGPTL1	1.96752	0.000475509	1.82129	0.00184503	-1.17489	0.0326537
F3	2.4021	3.69607e-08	1.8708	0.00270481	-2.07641	2.29086e-10
TNFAIP3	1.43066	5.71068e-05	1.03326	0.000623946	-1.16134	3.75821e-07
EGR1	5.59133	1.8477e-09	4.2899	0.000150554	-6.43391	2.72204e-15
DUSP4	1.94639	3.78825e-06	2.42235	1.16455e-06	-2.17884	1.11378e-08
LRAT	1.95097	6.41942e-05	1.49034	0.00185064	-2.38518	6.77538e-13
GJA3	1.26301	0.000454519	1.35813	0.0013468	-1.73363	8.77385e-07
EGR2	4.43434	5.94599e-12	3.60729	0.000297534	-4.70281	1.25777e-07
BHLHE41	3.40927	9.53362e-06	2.92545	3.65208e-05	-3.42393	2.51291e-08
SNAI1	2.20546	4.08596e-07	1.25752	0.0047936	-2.26557	8.7105e-10
ZBTB1	1.33214	1.11981e-10	1.1219	1.6872e-09	-1.38129	1.23481e-10
PTPRB	1.32118	0.0304675	2.06007	0.000525667	-1.83332	0.00199133
YWHAH-AS1	2.70046	4.93383e-06	2.41268	0.000287462	-2.9862	3.98661e-07
CDC42EP1	2.43857	1.31277e-07	1.87708	5.35603e-07	-2.06016	4.1095e-08
GAD1	1.15172	0.0124597	1.55037	0.0031308	-1.93727	7.32082e-05
AIPL1	2.75779	1.03137e-05	1.34294	0.0105878	-1.34532	4.77688e-05
PNCK	2.65154	1.90495e-07	1.26546	0.000274827	-2.28655	3.12202e-08
DUSP9	1.90098	5.01171e-05	1.00463	0.0142778	-1.31081	1.77771e-05
TNS4	1.83745	0.000671656	1.3393	0.00543994	-1.62877	0.000415478
ZSWIM4	1.01763	3.46607e-08	1.30792	1.80922e-08	-1.11606	1.80359e-08
EMILIN2	1.07587	2.21795e-05	1.03879	0.000133849	-1.03114	4.01048e-07
PER2	1.15248	3.11849e-06	1.53583	1.84244e-08	-1.27765	2.95793e-07
DCLK1	2.45758	4.97322e-11	1.88087	9.6194e-08	-1.80117	1.22689e-11
BHLHE40	3.98035	2.76063e-10	2.9095	7.39256e-08	-4.15486	1.75332e-11
PDGFRA	2.00414	6.1352e-10	1.03831	0.000596682	-1.09507	3.74739e-08
AGAP2	1.87414	9.76406e-05	1.48133	0.00820366	-1.97965	7.61079e-07
EGR4	6.75142	1.02378e-08	6.20077	5.75973e-05	-8.23969	2.26214e-09
SPRY2	1.45881	0.000102262	1.58255	8.34299e-05	-1.67006	1.2517e-10
EDNRB	1.11398	0.00411781	1.17765	0.0252587	-1.01531	1.7174e-08
MYC	1.42158	0.000653526	1.44601	0.000129136	-1.77083	2.15407e-11
CCN3	1.34044	0.0129629	2.25938	0.0031039	-1.25021	0.00319845
IER3	1.89956	4.87285e-07	1.21214	0.00588704	-1.27155	2.30984e-07
THBS1	2.92391	3.85564e-07	2.58479	0.000226247	-2.83504	6.72027e-10
CYP1B1	1.50568	0.000261332	1.68029	0.00032222	-1.9866	2.66648e-09
CH25H	2.81282	3.00886e-05	2.00519	0.00296256	-1.24783	0.000363958
DUSP5	2.87284	4.65283e-09	2.96962	6.19875e-09	-2.54098	7.11778e-09
NAB1	1.23579	1.70388e-08	1.54677	0.000101484	-1.62303	8.7105e-10
PCDH10	2.30496	2.97127e-08	2.49642	5.64131e-06	-2.99631	3.52835e-11
RASGEF1B	1.39674	1.23972e-06	1.98259	1.36023e-06	-1.78247	7.51136e-09
LEF1	3.74071	6.72592e-08	3.51216	7.97119e-08	-2.90986	7.85524e-08
PHLDA1	1.90352	4.84073e-06	2.6328	2.49462e-07	-2.20903	1.64949e-11
DUSP6	2.62865	2.12055e-05	3.48956	1.03331e-06	-4.98557	2.75752e-14
LPAR6	1.7172	0.000700914	1.39284	0.00253219	-1.58145	0.000218443
EPHA2	2.36474	2.3642e-08	1.73704	1.0255e-06	-1.72697	4.22679e-06
CCN1	1.61394	1.72771e-05	1.07257	0.0023844	-1.38901	1.97609e-10
PTPN7	3.06841	2.88444e-06	2.17888	0.000311224	-2.71687	3.01587e-06
CSRNP1	2.84245	4.84803e-13	1.54429	0.00128223	-2.47709	3.22785e-09
TAGLN3	1.29593	8.14967e-06	1.67458	0.00374723	-1.5768	2.48933e-06
VWA5B2	2.83181	0.000263414	2.15351	0.00351075	-2.92332	2.60922e-06
PLIN2	1.45308	4.38222e-09	1.39492	5.36486e-08	-1.40678	3.02851e-09
ADM	2.92517	1.76904e-09	2.80622	3.104e-09	-3.2559	3.52206e-12
PLCH2	2.31215	1.07576e-06	1.04353	0.00273164	-1.85478	3.6196e-06
LYPD1	2.20517	5.87082e-07	2.16758	5.1714e-06	-1.96225	4.82683e-06
POU4F1	1.82871	0.00189569	1.63992	0.00553279	-1.2462	0.000133875
KLF10	3.57984	3.59981e-14	2.46135	4.98228e-06	-3.21146	3.50247e-12
SLC30A2	1.50007	0.00054063	1.98538	6.9637e-06	-2.45231	9.99296e-05
DUSP2	2.72052	7.60998e-08	2.53098	2.98688e-05	-2.67404	1.18336e-07
GRHL3	2.05914	1.62886e-06	2.9329	1.80725e-05	-1.82935	1.22156e-08
RUNX1	1.73471	0.000126839	1.48903	0.00243708	-1.4398	2.09261e-05
LOC100506403	1.73471	0.000126839	1.48903	0.00243708	-1.4398	2.09261e-05
FNDC5	1.71754	1.65674e-07	1.80043	2.72293e-08	-1.09097	3.32139e-05
IER2	2.03427	1.6052e-11	1.47635	6.21752e-08	-2.06109	2.6161e-09
FGF19	2.46329	7.03556e-05	1.32228	0.0129148	-3.69491	2.15407e-11
DNAI3	1.51024	0.0186645	2.05767	0.00112451	-1.33769	0.0106743
ATXN7L2	1.24018	1.31277e-07	1.72853	3.104e-09	-1.60926	1.18683e-08
KCNF1	1.75897	0.00092154	1.79289	0.00600373	-1.97361	0.000245071
CDC42EP3	1.71909	2.8372e-07	2.49761	4.76612e-08	-2.53131	1.62333e-12
NUAK2	1.89345	2.82537e-06	1.1751	0.000379409	-1.52198	7.32071e-08
CXCL5	1.51772	0.0190906	1.40368	0.01316	-1.2167	3.88563e-08
SGMS2	3.27039	7.04264e-07	3.50227	8.45134e-07	-2.85077	2.77118e-09
SMIM43	1.89728	0.00294386	1.66381	0.0135878	-2.52488	0.000125197
OSGIN2	1.42615	1.43454e-10	1.15593	3.65208e-05	-1.5223	6.93505e-11
PDP1	1.63402	9.0038e-08	1.3731	1.30547e-06	-1.48787	9.46399e-11
GJB2	3.19888	4.86735e-06	3.393	6.62609e-05	-3.53558	7.95838e-08
SERPINB8	1.456	0.000756093	2.60476	1.66589e-06	-2.87546	3.44414e-06
NAB2	3.56983	5.84873e-14	2.77495	6.30211e-05	-3.64716	1.1666e-08
NAT16	2.6081	8.63122e-06	1.5605	0.00368796	-2.841	2.92533e-05
KLK6	2.7259	2.51286e-07	1.26886	0.00202794	-1.7197	9.9298e-06
TMC8	1.95286	0.00232561	1.2512	0.0428506	-2.01156	3.77036e-05
VASN	2.46029	7.2767e-09	2.02178	3.43485e-07	-2.44453	2.64307e-08
RHOH	1.34772	0.0106452	2.24712	0.000209226	-1.82533	1.09392e-05
HR	3.36263	0.000191582	3.99704	1.28895e-05	-2.44569	6.93342e-07
PXDC1	1.73929	4.59532e-05	1.48569	0.0152475	-1.17774	8.57885e-05
EFNA1	1.74139	1.71924e-07	1.66785	0.000763484	-1.79388	6.81518e-07
PLEKHA2	2.27589	6.50571e-07	1.60615	1.99215e-05	-1.63304	9.67353e-10
MT1E	1.57779	2.01997e-05	1.20803	0.000163066	-1.03135	1.2139e-07
FOS	4.12531	1.78794e-10	3.18374	6.36713e-07	-3.7351	1.62333e-12
LONRF2	3.6528	6.0668e-09	3.54569	2.6932e-05	-2.6167	3.17949e-08
JUNB	3.19663	2.64378e-09	1.8628	2.10931e-06	-2.54664	1.22436e-10
SLFN12	1.65062	0.0308748	1.87545	0.00626995	-1.00749	1.47361e-07
PPP1R3B	3.66982	4.14319e-07	2.05474	7.67641e-05	-1.67623	1.29733e-07
ZCCHC12	1.38709	0.00599347	1.20166	0.00745856	-1.0299	9.27882e-05
CD248	1.94427	9.61669e-06	1.81087	5.18994e-05	-1.86982	1.77003e-06
DES	3.35666	1.06621e-07	2.64601	4.34612e-06	-2.31177	6.40284e-08
KCNE3	1.0286	0.000539858	1.90746	1.30115e-06	-1.0207	6.66957e-05
LONRF3	2.76532	0.0028028	2.14	0.0255709	-1.97957	0.000129365
FOSL1	1.59527	5.87317e-05	1.3766	8.97634e-05	-1.7622	8.88953e-08
SPHK1	1.46294	0.000705452	1.24631	0.00543767	-1.91181	6.29652e-05
ZSCAN2	1.69546	7.26924e-06	1.03825	0.000242046	-1.79556	5.20807e-10
HIC1	4.54105	1.31854e-10	3.09573	2.98688e-05	-3.53959	1.26547e-09
CAVIN1	1.20374	3.80699e-05	1.20241	0.000264995	-1.12863	5.00942e-07
JUN	2.52822	2.02334e-08	2.19888	2.69718e-08	-2.04473	1.02251e-07
DNAJC22	2.18149	0.000148848	2.02855	0.000163066	-2.25788	1.25359e-05
TRIML2	1.56204	3.19708e-07	1.30894	7.67524e-06	-1.12531	5.29259e-08
EGR3	9.38518	5.92492e-14	7.8193	1.24001e-05	-8.61487	5.76646e-15
RNF227	1.11671	0.00836667	1.03067	0.0200669	-1.11555	0.000174275
CHRM4	2.63342	4.32813e-06	1.12567	0.0478274	-2.57747	6.05976e-06
LINC03040	2.38921	1.31057e-07	2.01433	1.88536e-05	-1.50248	2.36827e-07
PHLDA2	3.16057	1.46976e-06	3.51954	2.54206e-06	-2.73162	3.0096e-09
SLC35D3	4.28009	1.86635e-06	3.23731	5.67858e-05	-4.16876	1.35225e-10
SOX1	1.35784	0.0365123	2.50356	0.0245741	-1.88547	0.000294561
PDE4B	1.66293	4.12671e-05	1.5152	7.78895e-05	-1.72417	3.58858e-10
MAFF	2.91948	7.13783e-08	2.30244	9.00737e-06	-3.30298	1.877e-10
SAMD11	1.65092	0.00237343	2.20484	0.000535055	-2.11838	4.21345e-06
SPRY4	2.59735	4.08596e-07	2.59753	5.73752e-08	-3.10164	1.2517e-10
SLC38A3	1.5675	0.000380897	1.76444	0.00194935	-1.96022	6.83502e-05
PDCD1	2.21678	0.00042699	1.65133	0.009162	-2.07411	1.10697e-06
HBA2	1.91558	0.000875591	2.01299	0.00044538	-1.85755	2.77745e-06
HRH1	1.87343	0.00124908	2.06118	0.00176526	-2.1128	0.000528367
SERTAD1	2.42966	5.47075e-09	1.96658	0.000150554	-2.01252	1.68111e-06
ARC	3.42595	1.03965e-06	3.55361	2.73835e-06	-3.02501	1.00047e-08
SOX18	6.27347	9.9261e-08	3.11763	0.0078972	-5.05053	1.41789e-10
GABBR1	1.36356	3.92569e-07	1.1922	1.60152e-07	-1.17907	3.3158e-05
MUC12	2.09991	7.32883e-07	1.23054	0.000168918	-1.63907	0.026854
MT1M	2.52746	9.36868e-07	1.9372	0.000264995	-1.64642	0.000119727
SEC14L1P1	1.59419	0.0263353	1.62776	0.0216224	-1.67141	0.000166578
CLDN9	1.16162	6.98318e-05	1.07759	0.0041941	-1.36766	0.000109844
AATBC	2.10291	1.50202e-06	1.14451	0.000570854	-1.84694	4.98666e-07
ATAD3C	2.48803	0.000218057	1.76856	0.00445604	-1.68345	2.8312e-05
SP9	3.39389	0.000225712	2.41131	0.0160237	-2.59952	1.58689e-05
ZNF469	1.35587	0.00127315	1.1913	0.00143439	-1.22004	6.96241e-07
LNCPRESS1	1.63601	0.00582592	1.17947	0.0161885	-1.60374	9.46399e-11
RTL5	1.76665	7.20982e-07	3.16225	1.6872e-09	-1.40118	0.000863181
P2RY11	2.35728	3.71863e-08	2.00053	3.58776e-08	-2.99254	5.91391e-08
CYP2U1-AS1	2.31766	6.52228e-06	1.62282	0.00412195	-2.59432	8.46315e-06
LOC107986298	2.31766	6.52228e-06	1.62282	0.00412195	-2.59432	8.46315e-06
RRS1-DT	1.49379	0.00283654	1.54155	0.000877666	-1.59577	0.0289639
LINC02192	3.97823	0.000220286	3.61934	0.00174058	-2.66618	0.000941245
LOC100131496	1.42966	8.15609e-06	1.31715	8.87156e-05	-1.46985	0.0127834
SPIB	1.97576	0.000134162	2.09571	1.37561e-05	-1.45137	2.55887e-08
RAB7B	4.50685	5.17853e-06	4.69115	1.16455e-06	-2.35436	8.59087e-05
TYW1B	1.2739	1.7504e-06	1.11074	2.34938e-05	-1.10922	2.02105e-05
SSTR3	1.50543	0.0182049	2.34483	0.000923167	-1.68511	0.00261497
SEMA3C	-1.40509	0.0448446	-1.68358	0.016529	1.12352	0.000602133
RAB3A	-1.0707	0.000263414	-1.36223	0.000675615	1.13746	2.66588e-06
TPO	-1.13569	0.0131237	-1.00666	0.0429535	1.43963	0.00991634
MYB	-1.46315	2.30288e-05	-1.3266	4.71041e-05	1.10749	0.000237892
FGF23	-1.11207	0.0367199	-1.60979	0.00200782	1.23702	0.0106776
ZNF436	-1.62489	0.000251479	-1.80465	2.28033e-05	1.42849	0.00108143
ST8SIA2	-1.9024	4.23143e-06	-1.01409	0.000287281	1.41586	0.000212285
FBXO43	-1.64346	9.15683e-06	-2.13966	9.5783e-06	1.79767	1.56503e-05
STC1	-2.15931	0.00023855	-1.45437	0.000763484	1.17844	0.00600105
VSNL1	-1.91613	6.34009e-05	-1.50101	0.000581552	1.12435	0.000264975
PEX11A	-1.08381	0.000839053	-1.23716	0.000125982	1.33745	1.40509e-05
ZNF491	-1.075	0.0297625	-2.24303	0.00612343	1.69433	6.39118e-05
CSRNP3	-1.56132	6.21904e-06	-2.18374	4.4164e-06	1.18699	4.14385e-05
ZNF774	-1.21682	0.000247358	-1.29128	0.000380178	1.31298	0.000168319
ZNF624	-1.04028	5.28565e-06	-1.39405	4.2067e-07	1.13846	2.77451e-06
GRASLND	-1.48902	0.000881195	-1.83665	0.000150887	1.13596	0.00447731
ZBTB8B	-1.38814	6.74271e-07	-1.43204	1.45192e-06	1.43986	1.57899e-06
THRIL	-2.56202	5.1588e-05	-1.22979	0.00603904	1.81557	0.0106879
