# Supplementary material for: SALL3 mediates the loss of neuroectodermal differentiation potential in human embryonic stem cells with chromosome 18q loss
Source: Research Square preprint supplement (doi:10.21203/rs.3.rs-3100381/v1), 2023-07-28
Supplement: Supplementary file 2 [file e2684292d285818c0c130c8c.xlsx]

## Sheet: GSEA_vub13q_vs_WT_H_and_C2
	ID	Description	setSize	enrichmentScore	NES	pvalue	p.adjust	qvalue	rank	leading_edge	core_enrichment	size_edge	percent
HALLMARK_TNFA_SIGNALING_VIA_NFKB	HALLMARK_TNFA_SIGNALING_VIA_NFKB	HALLMARK_TNFA_SIGNALING_VIA_NFKB	169	0.680669	2.54314	1e-10	5e-09	3.15789e-09	1677	tags=42%, list=11%, signal=38%	KLF10/EGR3/EGR2/IER2/MCL1/FOS/BHLHE40/FOSB/HES1/RHOB/EGR1/JUNB/DUSP5/CCND1/JUN/KLF6/PPP1R15A/F3/GADD45B/MAFF/DUSP2/EFNA1/SERPINE1/YRDC/ZFP36/IER3/PNRC1/TRIB1/PHLDA2/EIF1/NFE2L2/DUSP4/PHLDA1/PFKFB3/HBEGF/DUSP1/SQSTM1/VEGFA/FOSL2/CCN1/F2RL1/JAG1/PER1/PDE4B/LIF/TNFAIP3/FOSL1/IFNGR2/SDC4/IL23A/GFPT2/KLF9/TIPARP/ZC3H12A/CLCF1/MYC/SPHK1/NR4A3/SERPINB8/FUT4/SOCS3/NFKBIA/MXD1/SMAD3/IL6/NR4A1/GCH1/SLC2A3/…	71	42.0118
HALLMARK_APOPTOSIS	HALLMARK_APOPTOSIS	HALLMARK_APOPTOSIS	141	0.526117	1.9152	2.26741e-07	4.27875e-06	2.70237e-06	2128	tags=31%, list=14%, signal=27%	EGR3/TNFRSF12A/MCL1/RHOB/ETF1/CCND1/JUN/GADD45B/WEE1/LEF1/IER3/SMAD7/BCL10/SQSTM1/CASP3/HMOX1/ISG20/LMNA/HSPB1/BCAP31/CD38/EBP/CYLD/DAP/TIMP1/IFNGR1/IL6/KRT18/BIK/DDIT3/HMGB2/GCH1/VDAC2/MGMT/PEA15/ATF3/RARA/BCL2L1/PSEN1/NEFH/DNAJC3/GNA15/PLCB2/CASP2	44	31.2057
HALLMARK_HYPOXIA	HALLMARK_HYPOXIA	HALLMARK_HYPOXIA	180	0.506818	1.90028	2.56725e-07	4.27875e-06	2.70237e-06	2622	tags=37%, list=17%, signal=31%	FOS/BHLHE40/ADM/PLIN2/JUN/KLF6/PPP1R15A/F3/MAFF/EFNA1/SERPINE1/ZFP36/IER3/PGK1/PNRC1/PDGFB/PFKFB3/DUSP1/VEGFA/CCN2/FOSL2/CCN1/MT1E/MT2A/CAVIN1/HMOX1/TNFAIP3/ISG20/PIM1/SDC4/KLF7/TIPARP/SLC2A1/MYH9/P4HA2/WSB1/STC2/IL6/MAP3K1/ALDOA/DDIT3/SLC2A3/KDM3A/CDKN1C/NAGK/VHL/FAM162A/NOCT/ATF3/NDRG1/TPI1/ADORA2B/PGM1/PRDX5/ALDOC/ENO1/CXCR4/BCAN/IRS2/GCNT2/IDS/ZNF292/PFKL/HK2/GAA/EFNA3/S100A4	67	37.2222
HALLMARK_TGF_BETA_SIGNALING	HALLMARK_TGF_BETA_SIGNALING	HALLMARK_TGF_BETA_SIGNALING	53	0.633292	2.0059	8.7658e-06	0.000109573	6.92037e-05	1622	tags=36%, list=10%, signal=32%	KLF10/JUNB/PPP1R15A/SERPINE1/THBS1/TGFB1/SMAD7/SMURF1/FURIN/FNTA/ARID4B/RHOA/IFNGR2/WWTR1/CDH1/SKIL/SMAD3/TJP1/CDKN1C	19	35.8491
HALLMARK_IL6_JAK_STAT3_SIGNALING	HALLMARK_IL6_JAK_STAT3_SIGNALING	HALLMARK_IL6_JAK_STAT3_SIGNALING	59	0.543413	1.74808	0.000541772	0.00451477	0.00285143	2698	tags=34%, list=17%, signal=28%	TNFRSF12A/PLA2G2A/JUN/TGFB1/HMOX1/IL4R/IFNGR2/PIM1/CD38/LTBR/IFNGR1/SOCS3/IL6/STAM2/MYD88/CD9/PF4/IRF9/PIK3R5/BAK1	20	33.8983
HALLMARK_P53_PATHWAY	HALLMARK_P53_PATHWAY	HALLMARK_P53_PATHWAY	188	0.4082	1.53854	0.000660743	0.0047196	0.0029808	3051	tags=32%, list=20%, signal=26%	FOS/TSPYL2/ZFP36L1/JUN/EPHA2/PPP1R15A/IER3/TGFB1/PRKAB1/TRAF4/HBEGF/SLC3A2/H2AJ/NOL8/CSRNP2/LIF/HMOX1/BAIAP2/TRIB3/INHBB/CDKN2AIP/OSGIN1/CCNG1/IP6K2/RCHY1/SPHK1/CEBPA/MXD1/SERTAD3/JAG2/DDIT3/PDGFA/KLK8/HINT1/GM2A/SLC7A11/FAM162A/ATF3/DNTTIP2/SERPINB5/NDRG1/NOTCH1/PVT1/TNFSF9/TXNIP/PERP/HEXIM1/PMM1/IRAK1/S100A4/CCNK/BAK1/FOXO3/RAD51C/IER5/CD82/NUDT15/DDIT4/MKNK2/SP1	60	31.9149
HALLMARK_UNFOLDED_PROTEIN_RESPONSE	HALLMARK_UNFOLDED_PROTEIN_RESPONSE	HALLMARK_UNFOLDED_PROTEIN_RESPONSE	111	0.468333	1.67017	0.000839231	0.0052452	0.00331276	2537	tags=32%, list=16%, signal=27%	TSPYL2/DKC1/HSPA9/DCP2/HERPUD1/VEGFA/ATF4/BAG3/SEC31A/PARN/KIF5B/XBP1/DNAJB9/STC2/EDEM1/EIF2AK3/YWHAZ/SLC1A4/CEBPG/CEBPB/NFYA/CHAC1/ATF3/SDAD1/EIF4A1/SERP1/DNAJC3/MTHFD2/TUBB2A/SRPRA/LSM4/FUS/NABP1/TARS1/SRPRB	35	31.5315
HALLMARK_COAGULATION	HALLMARK_COAGULATION	HALLMARK_COAGULATION	92	0.470074	1.63108	0.00105289	0.00557073	0.00351836	3761	tags=36%, list=24%, signal=27%	ARF4/F3/MAFF/SERPINE1/THBS1/PDGFB/WDR1/FURIN/DUSP6/LAMP2/KLF7/CRIP2/TIMP1/USP11/KLK8/GDA/S100A13/MST1/C1R/CD9/PF4/C3/CLU/RGN/LRP1/VWF/GP1BA/CFB/HPN/DUSP14/SPARC/BMP1/CAPN5	33	35.8696
HALLMARK_MYOGENESIS	HALLMARK_MYOGENESIS	HALLMARK_MYOGENESIS	156	0.42384	1.56557	0.00122556	0.00557073	0.00351836	3312	tags=35%, list=21%, signal=28%	BHLHE40/GADD45B/DES/TGFB1/FOXO4/SH3BGR/SLC6A8/HBEGF/ACHE/MEF2D/HDAC5/WWTR1/HSPB2/MYH9/COL1A1/SPHK1/LPIN1/STC2/KLF5/TEAD4/HRC/ATP6AP1/SMTN/DMPK/TPM2/AGRN/CNN3/CRYAB/TAGLN/PDLIM7/CACNA1H/NOTCH1/FHL1/LAMA2/PRNP/FABP3/MYOZ1/MYH11/GJA5/DENND2B/ITGA7/GAA/FGF2/MYO1C/MAPK12/CLU/CRAT/KCNH2/ATP2A1/MEF2A/MRAS/ENO3/CASQ1/HSPB8/SYNGR2	55	35.2564
HALLMARK_KRAS_SIGNALING_DN	HALLMARK_KRAS_SIGNALING_DN	HALLMARK_KRAS_SIGNALING_DN	117	0.377387	1.35198	0.0299301	0.0848783	0.0536073	3356	tags=33%, list=22%, signal=26%	GPRC5C/LFNG/CACNA1F/SLC5A5/NUDT11/BRDT/KCND1/MEFV/PRODH/SKIL/SLC38A3/PDCD1/KCNMB1/KCNN1/KLK8/SNN/IGFBP2/FGGY/YBX2/FGF16/MFSD6/EGF/ITGB1BP2/FGFR3/NRIP2/GPR3/HSD11B2/SNCB/TENT5C/KLK7/IRS4/PDE6B/NPHS1/STAG3/IDUA/TCL1A/SYNPO/GPR19/ADRA2C	39	33.3333
WP_CILIOPATHIES	WP_CILIOPATHIES	WP_CILIOPATHIES	165	-0.458757	-1.84344	1.14734e-06	0.000829526	0.000739128	2783	tags=36%, list=18%, signal=30%	TMEM107/ARL6/ZNF423/KIAA0753/IFT81/DYNC2LI1/CPLANE1/INVS/NME7/DYNC2I1/NPHP1/TTC21B/TTC8/TCTN1/TMEM138/CCDC39/BBS4/TMEM231/BBS5/PKD2/CEP78/EVC/CEP83/CLUAP1/RPGRIP1L/LCA5/DDX59/BBS1/DNAAF5/POC1A/IFT57/NEK2/ZIC2/TTBK2/TMEM237/C2CD3/WDR35/BBS12/TRIM32/TUB/AHI1/ODAD2/KIAA0586/INTU/CEP290/WDPCP/GPR161/PIBF1/EFHC1/TTLL5/CEP164/BBS10/XPNPEP3/PIK3R4/NEK1/FAM161A/TRAF3IP1/GLI2/DNAAF2	59	35.7576
WP_GENES_RELATED_TO_PRIMARY_CILIUM_DEVELOPMENT_BASED_ON_CRISPR	WP_GENES_RELATED_TO_PRIMARY_CILIUM_DEVELOPMENT_BASED_ON_CRISPR	WP_GENES_RELATED_TO_PRIMARY_CILIUM_DEVELOPMENT_BASED_ON_CRISPR	103	-0.491842	-1.84678	1.64147e-05	0.00593393	0.00528728	2948	tags=45%, list=19%, signal=36%	BBS7/IFT172/IFT52/CEP192/RAB23/CEP43/TUBD1/TMEM107/ARL6/KIAA0753/IFT81/DYNC2LI1/CEP76/CPLANE1/IFT88/DYNC2I1/TTC21B/TTC8/TCTN1/BBS4/TMEM231/BBS5/CEP44/TTC26/EVC/CEP83/CLUAP1/RPGRIP1L/BBS1/IFT57/TTBK2/C2CD3/WDR35/BBS12/TEDC2/EFCAB7/TTC23/KATNB1/WDPCP/CEP162/PIBF1/TTC30B/BBS10/FBF1/TRAF3IP1/CEP97	46	44.6602
KEGG_CYTOKINE_CYTOKINE_RECEPTOR_INTERACTION	KEGG_CYTOKINE_CYTOKINE_RECEPTOR_INTERACTION	KEGG_CYTOKINE_CYTOKINE_RECEPTOR_INTERACTION	118	0.497798	1.77196	3.71419e-05	0.0067134	0.0059818	2573	tags=36%, list=17%, signal=30%	TNFRSF12A/PDGFRA/PLEKHO2/CX3CL1/TGFB1/IL11/PDGFB/VEGFA/LIF/IL15/IL4R/IFNGR2/TNFRSF25/INHBB/TGFBR2/IL23A/EDA2R/LTBR/RELT/EDA/CLCF1/TSLP/IFNGR1/IL6/CXCR2/PDGFA/NGFR/IL2RB/IL20RB/IL6R/AMH/CXCR4/IL12RB2/TNFRSF13C/EGF/TNFSF9/CNTF/CXCL5/PF4/CCL26/INHBC/INHBA	42	35.5932
WP_TGFBETA_RECEPTOR_SIGNALING_IN_SKELETAL_DYSPLASIAS	WP_TGFBETA_RECEPTOR_SIGNALING_IN_SKELETAL_DYSPLASIAS	WP_TGFBETA_RECEPTOR_SIGNALING_IN_SKELETAL_DYSPLASIAS	53	0.591046	1.84393	0.000159809	0.0182113	0.0162267	2573	tags=34%, list=17%, signal=28%	FOS/JUN/LEF1/SERPINE1/THBS1/TGFB1/SMAD7/TFE3/SMAD5/LIF/TGFBR2/SKIL/SMAD3/EP300/FOXH1/EGF/LEFTY1/INHBA	18	33.9623
WP_TGFBETA_RECEPTOR_SIGNALING	WP_TGFBETA_RECEPTOR_SIGNALING	WP_TGFBETA_RECEPTOR_SIGNALING	49	0.606733	1.87453	0.000231088	0.0208846	0.0186087	2573	tags=37%, list=17%, signal=31%	FOS/JUN/LEF1/SERPINE1/THBS1/TGFB1/SMAD7/TFE3/SMAD5/LIF/TGFBR2/SKIL/SMAD3/EP300/FOXH1/EGF/LEFTY1/INHBA	18	36.7347
KEGG_LEUKOCYTE_TRANSENDOTHELIAL_MIGRATION	KEGG_LEUKOCYTE_TRANSENDOTHELIAL_MIGRATION	KEGG_LEUKOCYTE_TRANSENDOTHELIAL_MIGRATION	88	0.496873	1.69708	0.000468305	0.033592	0.0299313	3058	tags=35%, list=20%, signal=28%	ACTG1/CLDN7/CTNNA1/EZR/VASP/BCAR1/VCL/RHOA/ACTN1/CLDN9/PIK3CA/ITK/CLDN19/GNAI2/MSN/F11R/VAV1/THY1/CDC42/ACTB/PIK3R1/MYL12A/RHOH/CXCR4/MAPK11/ACTN4/PIK3R5/MAPK12/RAC2/CLDN23/PRKCB	31	35.2273
WP_PHOTODYNAMIC_THERAPYINDUCED_NFE2L2_NRF2_SURVIVAL_SIGNALING	WP_PHOTODYNAMIC_THERAPYINDUCED_NFE2L2_NRF2_SURVIVAL_SIGNALING	WP_PHOTODYNAMIC_THERAPYINDUCED_NFE2L2_NRF2_SURVIVAL_SIGNALING	22	0.710952	1.85727	0.000564012	0.0339817	0.0302785	2774	tags=45%, list=18%, signal=37%	FOS/JUN/NFE2L2/HMOX1/NQO2/GCLC/MAPK11/GSTP1/SRXN1/MAPK12	10	45.4545
WP_BARDETBIEDL_SYNDROME	WP_BARDETBIEDL_SYNDROME	WP_BARDETBIEDL_SYNDROME	84	-0.451534	-1.64115	0.000721921	0.0401499	0.0357745	2783	tags=40%, list=18%, signal=33%	BBS7/IFT172/IFT52/RAB23/SUFU/TMEM107/ARL6/IFT81/DYNC2LI1/INVS/DYNC2I1/TTC21B/TTC8/BBS4/BBS5/PKD2/EVC/CLUAP1/LCA5/BBS1/IFT57/ZIC2/WDR35/BBS12/TRIM32/CEP290/WDPCP/GPR161/EFHC1/CEP164/BBS10/NEK1/TRAF3IP1/GLI2	34	40.4762
WP_CANONICAL_AND_NONCANONICAL_NOTCH_SIGNALING	WP_CANONICAL_AND_NONCANONICAL_NOTCH_SIGNALING	WP_CANONICAL_AND_NONCANONICAL_NOTCH_SIGNALING	24	0.676711	1.80856	0.000973102	0.0424626	0.0378352	2034	tags=33%, list=13%, signal=29%	HES1/LEF1/DLL1/DLK1/JAG1/JAG2/PSEN1/NOTCH1	8	33.3333
WP_LUNG_FIBROSIS	WP_LUNG_FIBROSIS	WP_LUNG_FIBROSIS	37	0.616618	1.79689	0.000916808	0.0424626	0.0378352	2315	tags=46%, list=15%, signal=39%	TGFB1/SMAD7/NFE2L2/PDGFB/MECP2/CCN2/MT2A/HMOX1/PARN/SKIL/TIMP1/IL6/PDGFA/CEBPB/FGF1/CALCA/EGF	17	45.9459
WP_NRF2_PATHWAY	WP_NRF2_PATHWAY	WP_NRF2_PATHWAY	94	0.488126	1.68495	0.000891534	0.0424626	0.0378352	2345	tags=33%, list=15%, signal=28%	EGR1/EPHA2/MAFF/TGFB1/MAFG/NFE2L2/PDGFB/PRDX1/SLC6A8/SLC5A5/HBEGF/SQSTM1/GSTM5/G6PD/HMOX1/TGFBR2/CBR3/SLC2A1/PRDX6/GSTM2/SLC2A3/SLC5A12/SLC2A10/SLC7A11/FTH1/SLC2A8/GCLC/SLC39A4/HSPA1A/GSTP1/DNAJB1	31	32.9787
WP_OVERVIEW_OF_PROINFLAMMATORY_AND_PROFIBROTIC_MEDIATORS	WP_OVERVIEW_OF_PROINFLAMMATORY_AND_PROFIBROTIC_MEDIATORS	WP_OVERVIEW_OF_PROINFLAMMATORY_AND_PROFIBROTIC_MEDIATORS	29	0.651295	1.81139	0.00135149	0.0443545	0.039521	2523	tags=45%, list=16%, signal=38%	CX3CL1/TGFB1/IL11/VEGFA/LIF/IL15/IL23A/TSLP/IL6/CNTF/CXCL5/PF4/CCL26	13	44.8276
WP_QUERCETIN_AND_NFKB_AP1_INDUCED_APOPTOSIS	WP_QUERCETIN_AND_NFKB_AP1_INDUCED_APOPTOSIS	WP_QUERCETIN_AND_NFKB_AP1_INDUCED_APOPTOSIS	13	0.785278	1.79138	0.00140598	0.0443545	0.039521	1285	tags=54%, list=8%, signal=49%	FOS/JUN/MAFG/NFE2L2/VEGFA/MAFK/NFKBIA	7	53.8462
WP_OVERLAP_BETWEEN_SIGNAL_TRANSDUCTION_PATHWAYS_CONTRIBUTING_TO_LMNA_LAMINOPATHIES	WP_OVERLAP_BETWEEN_SIGNAL_TRANSDUCTION_PATHWAYS_CONTRIBUTING_TO_LMNA_LAMINOPATHIES	WP_OVERLAP_BETWEEN_SIGNAL_TRANSDUCTION_PATHWAYS_CONTRIBUTING_TO_LMNA_LAMINOPATHIES	48	0.572056	1.76091	0.00133059	0.0443545	0.039521	2035	tags=35%, list=13%, signal=31%	HES1/JUNB/LEF1/TCF7/TGFB1/EMD/KAT2B/FNTA/LMNA/CEBPA/SMAD3/CEBPB/ACTB/MAOA/TLE1/NOTCH1/MAOB	17	35.4167
KEGG_JAK_STAT_SIGNALING_PATHWAY	KEGG_JAK_STAT_SIGNALING_PATHWAY	KEGG_JAK_STAT_SIGNALING_PATHWAY	88	0.479543	1.63789	0.00128611	0.0443545	0.039521	2705	tags=38%, list=17%, signal=31%	CCND1/SPRY4/SPRED1/IL11/SOCS4/LIF/IL15/IL4R/IFNGR2/SPRY2/PIM1/PIK3CA/IL23A/CLCF1/MYC/TSLP/IFNGR1/SOCS3/IL6/STAT6/STAM2/IL2RB/IL20RB/BCL2L1/PIK3R1/IL6R/EP300/IL12RB2/SOCS5/CNTF/IRF9/PIK3R5/CBLC	33	37.5
WP_MAPK_SIGNALING_PATHWAY	WP_MAPK_SIGNALING_PATHWAY	WP_MAPK_SIGNALING_PATHWAY	213	0.399691	1.52737	0.00131443	0.0443545	0.039521	2774	tags=31%, list=18%, signal=26%	FOS/MAP3K14/JUN/DUSP2/DUSP8/PPM1B/CACNA1F/TGFB1/ELK1/PTPN7/FLNA/DUSP4/PDGFB/DUSP1/DUSP6/FGF18/FGF9/ATF4/CASP3/DUSP9/ELK4/FGF19/RASGRP2/IKBKG/MAPK10/TGFBR2/JUND/HSPB1/FGFR2/SRF/NRAS/CACNB1/TAB2/MYC/PLA2G4C/MAP4K1/MAP3K1/NR4A1/DDIT3/CACNG8/PDGFA/ARAF/FLNC/RASGRP4/CDC42/MAPKAPK2/FLNB/RASA2/FGF1/CACNA1B/FGF8/CACNA1H/FGF16/HSPA1A/MAPK11/EGF/CACNG6/MAPKAPK5/LAMTOR3/FGFR3/CACNA2D2/PRKCD/ARRB1/FGF2/RELB/…	67	31.4554
WP_MODULATORS_OF_TCR_SIGNALING_AND_T_CELL_ACTIVATION	WP_MODULATORS_OF_TCR_SIGNALING_AND_T_CELL_ACTIVATION	WP_MODULATORS_OF_TCR_SIGNALING_AND_T_CELL_ACTIVATION	50	0.547499	1.6972	0.00211678	0.063768	0.0568188	2457	tags=36%, list=16%, signal=30%	MAP3K14/ZFP36L1/SH2B3/BCL10/RPRD1B/TNFAIP3/IKBKG/MEF2D/ITK/RNF7/NFKBIA/MAP4K1/VAV1/RASA2/PIK3R1/RHOH/DGKZ/CUL5	18	36
WP_ZINC_HOMEOSTASIS	WP_ZINC_HOMEOSTASIS	WP_ZINC_HOMEOSTASIS	26	0.648299	1.76414	0.00343397	0.0954907	0.0850845	1090	tags=35%, list=7%, signal=32%	SLC30A1/MT1M/MT1F/MT1E/MT2A/MT1G/MT1X/MT1H/SLC30A2	9	34.6154
WP_PLURIPOTENT_STEM_CELL_DIFFERENTIATION_PATHWAY	WP_PLURIPOTENT_STEM_CELL_DIFFERENTIATION_PATHWAY	WP_PLURIPOTENT_STEM_CELL_DIFFERENTIATION_PATHWAY	29	0.622557	1.73146	0.00443785	0.103502	0.0922228	2712	tags=55%, list=18%, signal=46%	TGFB1/IL11/PDGFB/VEGFA/IL6/PDGFA/FGF1/IL6R/FGF8/NOTCH1/NODAL/EGF/CNTF/LEFTY1/INHBA/FGF2	16	55.1724
WP_TRANSCRIPTIONAL_CASCADE_REGULATING_ADIPOGENESIS	WP_TRANSCRIPTIONAL_CASCADE_REGULATING_ADIPOGENESIS	WP_TRANSCRIPTIONAL_CASCADE_REGULATING_ADIPOGENESIS	11	0.766445	1.6892	0.00423164	0.103502	0.0922228	1668	tags=64%, list=11%, signal=57%	EGR2/GATA2/KLF5/CEBPA/DDIT3/CEBPG/CEBPB	7	63.6364
KEGG_PURINE_METABOLISM	KEGG_PURINE_METABOLISM	KEGG_PURINE_METABOLISM	139	-0.370905	-1.45781	0.00443708	0.103502	0.0922228	3250	tags=31%, list=21%, signal=25%	ADCY1/ADA/PDE7A/POLR2H/GUCY1B1/NME2/POLR1A/ADSS2/PAPSS2/PRIM1/NME7/PDE3A/NT5C/AK4/NUDT5/ADSL/POLE2/PRIM2/GART/NME3/POLR2I/ENTPD5/PDE10A/NT5E/PDE9A/RRM1/IMPDH1/ENTPD4/GUCY1A2/ADCY2/PDE3B/PFAS/ADK/CANT1/POLD3/PRUNE1/POLR1B/GMPS/PDE5A/PPAT/ENTPD1/POLR3G/POLD2	43	30.9353
KEGG_CIRCADIAN_RHYTHM_MAMMAL	KEGG_CIRCADIAN_RHYTHM_MAMMAL	KEGG_CIRCADIAN_RHYTHM_MAMMAL	12	0.74892	1.67641	0.00542872	0.104226	0.0928677	816	tags=42%, list=5%, signal=40%	BHLHE40/PER2/BHLHE41/PER1/CSNK1D	5	41.6667
KEGG_PATHOGENIC_ESCHERICHIA_COLI_INFECTION	KEGG_PATHOGENIC_ESCHERICHIA_COLI_INFECTION	KEGG_PATHOGENIC_ESCHERICHIA_COLI_INFECTION	45	0.547276	1.66389	0.00525925	0.104226	0.0928677	2161	tags=36%, list=14%, signal=31%	ACTG1/HCLS1/EZR/RHOA/ARPC5L/WASL/CDH1/TUBA1C/TUBB4A/KRT18/YWHAZ/ARPC3/CDC42/ACTB/ARPC4/TUBB2A	16	35.5556
WP_PATHOGENIC_ESCHERICHIA_COLI_INFECTION	WP_PATHOGENIC_ESCHERICHIA_COLI_INFECTION	WP_PATHOGENIC_ESCHERICHIA_COLI_INFECTION	45	0.547276	1.66389	0.00525925	0.104226	0.0928677	2161	tags=36%, list=14%, signal=31%	ACTG1/HCLS1/EZR/RHOA/ARPC5L/WASL/CDH1/TUBA1C/TUBB4A/KRT18/YWHAZ/ARPC3/CDC42/ACTB/ARPC4/TUBB2A	16	35.5556
WP_COPPER_HOMEOSTASIS	WP_COPPER_HOMEOSTASIS	WP_COPPER_HOMEOSTASIS	44	0.54482	1.64473	0.00473263	0.104226	0.0928677	3370	tags=50%, list=22%, signal=39%	CCND1/JUN/MT1F/MT1E/MT2A/MT1G/CASP3/MT1X/MT1H/PIK3CA/MTF2/PRNP/ATOX1/APC/FOXO3/ATP7A/SP1/AKT1/MAPT/CCS/SOD1/MDM2	22	50
KEGG_PYRIMIDINE_METABOLISM	KEGG_PYRIMIDINE_METABOLISM	KEGG_PYRIMIDINE_METABOLISM	90	-0.40874	-1.50051	0.00477439	0.104226	0.0928677	2840	tags=30%, list=18%, signal=25%	UCK1/NME2/POLR1A/PRIM1/NME7/NT5C/POLE2/PRIM2/CMPK1/NME3/DTYMK/POLR2I/ENTPD5/NT5E/CTPS1/RRM1/ENTPD4/CAD/CANT1/DUT/POLD3/TYMS/POLR1B/ENTPD1/POLR3G/UCK2/POLD2	27	30
WP_DNA_REPAIR_PATHWAYS_FULL_NETWORK	WP_DNA_REPAIR_PATHWAYS_FULL_NETWORK	WP_DNA_REPAIR_PATHWAYS_FULL_NETWORK	120	-0.382579	-1.47835	0.00615473	0.111247	0.0991235	2566	tags=32%, list=17%, signal=27%	XPC/MUTYH/CUL4A/WRN/GTF2H4/BRIP1/XRCC1/RAD52/FANCD2/APEX2/FANCE/POLE2/FANCM/XRCC5/RPA1/RFC2/NHEJ1/RFC1/FANCA/EXO1/ERCC4/POLL/FANCI/BRCA1/NTHL1/FANCC/FANCL/GTF2H2/NEIL3/RAD54B/POLD3/MLH1/FANCG/POLI/POLK/ATR/FANCF/PARP2/POLD2	39	32.5
WP_ENDOMETRIAL_CANCER	WP_ENDOMETRIAL_CANCER	WP_ENDOMETRIAL_CANCER	63	0.475504	1.53824	0.00802628	0.128956	0.114903	2794	tags=37%, list=18%, signal=30%	FOS/AXIN2/CCND1/CTNNA1/GADD45B/LEF1/TCF7/ELK1/PIK3CA/FGFR2/CDH1/NRAS/MYC/ARAF/FGF1/PIK3R1/APC2/EGF/FGFR3/BAK1/FGF2/APC/FOXO3	23	36.5079
KEGG_TERPENOID_BACKBONE_BIOSYNTHESIS	KEGG_TERPENOID_BACKBONE_BIOSYNTHESIS	KEGG_TERPENOID_BACKBONE_BIOSYNTHESIS	13	-0.69681	-1.6658	0.0101504	0.145498	0.129642	3219	tags=54%, list=21%, signal=43%	FDPS/ACAT2/HMGCS1/PDSS1/MVK/PDSS2/MVD	7	53.8462
WP_HAIR_FOLLICLE_DEVELOPMENT_ORGANOGENESIS_PART_2_OF_3	WP_HAIR_FOLLICLE_DEVELOPMENT_ORGANOGENESIS_PART_2_OF_3	WP_HAIR_FOLLICLE_DEVELOPMENT_ORGANOGENESIS_PART_2_OF_3	28	0.586232	1.62306	0.0101678	0.145498	0.129642	1836	tags=39%, list=12%, signal=35%	PDGFRA/CCND1/LEF1/SNAI1/GTPBP4/FGFR2/CDH1/EDA/MYC/PDGFA/FGF1	11	39.2857
WP_INFLUENCE_OF_LAMINOPATHIES_ON_WNT_SIGNALING	WP_INFLUENCE_OF_LAMINOPATHIES_ON_WNT_SIGNALING	WP_INFLUENCE_OF_LAMINOPATHIES_ON_WNT_SIGNALING	30	0.568825	1.58795	0.0104574	0.145498	0.129642	2014	tags=33%, list=13%, signal=29%	HES1/CCND1/LEF1/TCF7/EMD/FNTA/LMNA/CEBPA/CEBPB/TLE1	10	33.3333
KEGG_HYPERTROPHIC_CARDIOMYOPATHY_HCM	KEGG_HYPERTROPHIC_CARDIOMYOPATHY_HCM	KEGG_HYPERTROPHIC_CARDIOMYOPATHY_HCM	62	0.470212	1.52042	0.00959896	0.145498	0.129642	2448	tags=31%, list=16%, signal=26%	ACTG1/DES/CACNA1F/TGFB1/TPM4/PRKAB1/EMD/LMNA/ITGA5/CACNB1/IL6/CACNG8/ACE/TPM2/ACTB/LAMA2/CACNG6/ITGA7/CACNA2D2	19	30.6452
WP_BURN_WOUND_HEALING	WP_BURN_WOUND_HEALING	WP_BURN_WOUND_HEALING	78	0.446144	1.48958	0.01088	0.145498	0.129642	2573	tags=31%, list=17%, signal=26%	CNN2/CD248/VEGFA/ACHE/CASP3/IL15/TNFAIP3/LIN28A/FGFR2/TIMP1/COL1A1/SERPINH1/NFKBIA/SMAD3/IL6/CXCR2/LGALS1/TAGLN/MYD88/CXCR4/EGF/FGFR3/SFRP2/INHBA	24	30.7692
WP_FGFR3_SIGNALING_IN_CHONDROCYTE_PROLIFERATION_AND_TERMINAL_DIFFERENTIATION	WP_FGFR3_SIGNALING_IN_CHONDROCYTE_PROLIFERATION_AND_TERMINAL_DIFFERENTIATION	WP_FGFR3_SIGNALING_IN_CHONDROCYTE_PROLIFERATION_AND_TERMINAL_DIFFERENTIATION	25	0.588788	1.59003	0.0122122	0.152231	0.135641	2774	tags=32%, list=18%, signal=26%	PPP2CA/SNAI1/FGF18/FGF9/SOX9/MAPK11/FGFR3/MAPK12	8	32
WP_MEVALONATE_ARM_OF_CHOLESTEROL_BIOSYNTHESIS_PATHWAY	WP_MEVALONATE_ARM_OF_CHOLESTEROL_BIOSYNTHESIS_PATHWAY	WP_MEVALONATE_ARM_OF_CHOLESTEROL_BIOSYNTHESIS_PATHWAY	12	-0.690195	-1.61418	0.0132683	0.158222	0.14098	3219	tags=42%, list=21%, signal=33%	FDPS/ACAT2/HMGCS1/MVK/MVD	5	41.6667
WP_PDGF_PATHWAY	WP_PDGF_PATHWAY	WP_PDGF_PATHWAY	39	0.529834	1.56399	0.0144823	0.166202	0.14809	1956	tags=33%, list=13%, signal=29%	FOS/JUN/ELK1/PDGFB/RHOA/WASL/SRF/NFKBIA/VAV1/MAP3K1/PDGFA/CDC42/PIK3R1	13	33.3333
KEGG_VALINE_LEUCINE_AND_ISOLEUCINE_DEGRADATION	KEGG_VALINE_LEUCINE_AND_ISOLEUCINE_DEGRADATION	KEGG_VALINE_LEUCINE_AND_ISOLEUCINE_DEGRADATION	42	-0.480094	-1.54235	0.0159121	0.175679	0.156534	3560	tags=45%, list=23%, signal=35%	ALDH3A2/OXCT2/ACAT2/MMUT/IVD/PCCB/HMGCS1/HADHB/AOX1/DBT/ECHS1/MCCC2/MCCC1/OXCT1/BCKDHB/HIBCH/ALDH1B1/ACAD8/BCAT1	19	45.2381
WP_PHOTODYNAMIC_THERAPYINDUCED_HIF1_SURVIVAL_SIGNALING	WP_PHOTODYNAMIC_THERAPYINDUCED_HIF1_SURVIVAL_SIGNALING	WP_PHOTODYNAMIC_THERAPYINDUCED_HIF1_SURVIVAL_SIGNALING	33	0.537547	1.53051	0.0175783	0.179314	0.159773	1816	tags=33%, list=12%, signal=29%	MCL1/SERPINE1/PGK1/PDHA1/ANGPT1/VEGFA/SLC2A1/PKM/SLC2A3/IGFBP2/BCL2L1	11	33.3333
KEGG_ARRHYTHMOGENIC_RIGHT_VENTRICULAR_CARDIOMYOPATHY_ARVC	KEGG_ARRHYTHMOGENIC_RIGHT_VENTRICULAR_CARDIOMYOPATHY_ARVC	KEGG_ARRHYTHMOGENIC_RIGHT_VENTRICULAR_CARDIOMYOPATHY_ARVC	61	0.461235	1.48388	0.0172441	0.179314	0.159773	2539	tags=31%, list=16%, signal=26%	ACTG1/CTNNA1/LEF1/DES/TCF7/CACNA1F/EMD/GJA1/ACTN1/LMNA/ITGA5/CACNB1/CACNG8/ACTB/LAMA2/CACNG6/ITGA7/CACNA2D2/ACTN4	19	31.1475
WP_ARRHYTHMOGENIC_RIGHT_VENTRICULAR_CARDIOMYOPATHY	WP_ARRHYTHMOGENIC_RIGHT_VENTRICULAR_CARDIOMYOPATHY	WP_ARRHYTHMOGENIC_RIGHT_VENTRICULAR_CARDIOMYOPATHY	61	0.461235	1.48388	0.0172441	0.179314	0.159773	2539	tags=31%, list=16%, signal=26%	ACTG1/CTNNA1/LEF1/DES/TCF7/CACNA1F/EMD/GJA1/ACTN1/LMNA/ITGA5/CACNB1/CACNG8/ACTB/LAMA2/CACNG6/ITGA7/CACNA2D2/ACTN4	19	31.1475
WP_CYTOKINES_AND_INFLAMMATORY_RESPONSE	WP_CYTOKINES_AND_INFLAMMATORY_RESPONSE	WP_CYTOKINES_AND_INFLAMMATORY_RESPONSE	10	0.755698	1.62264	0.0194967	0.191233	0.170393	1478	tags=50%, list=10%, signal=45%	TGFB1/IL11/IL15/IL6/PDGFA	5	50
WP_WHITE_FAT_CELL_DIFFERENTIATION	WP_WHITE_FAT_CELL_DIFFERENTIATION	WP_WHITE_FAT_CELL_DIFFERENTIATION	26	0.586989	1.5973	0.0200946	0.191233	0.170393	1869	tags=38%, list=12%, signal=34%	EGR2/CTNNA1/GATA2/KLF5/IRF3/CEBPA/DDIT3/CEBPB/RARA/TLE3	10	38.4615
KEGG_CARDIAC_MUSCLE_CONTRACTION	KEGG_CARDIAC_MUSCLE_CONTRACTION	KEGG_CARDIAC_MUSCLE_CONTRACTION	57	0.473555	1.50219	0.020102	0.191233	0.170393	4687	tags=53%, list=30%, signal=37%	CACNA1F/TPM4/COX7B/CACNB1/ATP1B2/CACNG8/UQCRQ/TPM2/ATP1A4/CACNG6/CACNA2D2/COX6B2/COX7A2L/COX4I1/ATP1B3/CACNA1C/TPM1/COX6B1/CACNG7/COX6A1/CACNA2D3/TNNT2/CACNG4/CACNG5/COX6C/TNNI3/SLC9A6/COX5B/COX5A/UQCRH	30	52.6316
WP_TH17_CELL_DIFFERENTIATION_PATHWAY	WP_TH17_CELL_DIFFERENTIATION_PATHWAY	WP_TH17_CELL_DIFFERENTIATION_PATHWAY	50	0.481676	1.49316	0.0199064	0.191233	0.170393	2006	tags=30%, list=13%, signal=26%	FOS/JUN/TGFB1/PER1/IL4R/RUNX1/IL23A/RORC/IFNGR1/SOCS3/NFKBIA/IL6/STAT6/RARA/IL6R	15	30
KEGG_RIBOSOME	KEGG_RIBOSOME	KEGG_RIBOSOME	86	0.424341	1.44184	0.0190862	0.191233	0.170393	5677	tags=52%, list=37%, signal=33%	RPL36A/RPL10/RPS26/RPS4X/RPL3L/RSL24D1/RPL39/RPL22/RPS9/RPS3/RPS28/RPL3/RPL38/RPL10A/RPS19/RPS17/RPL15/RPL5/RPL8/RPS25/RPL13A/RPL23A/RPL31/RPS11/RPS16/RPL23/RPL18A/RPL21/RPL32/RPS15A/RPS27A/FAU/RPL30/RPS5/RPS6/RPS27L/RPL17/RPS21/RPL24/RPS10/RPS13/RPL11/RPS29/RPL7A/RPS15	45	52.3256
KEGG_GLYCOSAMINOGLYCAN_BIOSYNTHESIS_HEPARAN_SULFATE	KEGG_GLYCOSAMINOGLYCAN_BIOSYNTHESIS_HEPARAN_SULFATE	KEGG_GLYCOSAMINOGLYCAN_BIOSYNTHESIS_HEPARAN_SULFATE	24	-0.563611	-1.57227	0.0206058	0.19348	0.172395	3683	tags=54%, list=24%, signal=41%	NDST3/B3GAT3/B3GAT1/EXTL3/HS3ST2/HS6ST2/EXTL2/HS6ST3/GLCE/HS3ST5/HS3ST3A1/B3GAT2/NDST2	13	54.1667
WP_WNT_SIGNALING_PATHWAY_AND_PLURIPOTENCY	WP_WNT_SIGNALING_PATHWAY_AND_PLURIPOTENCY	WP_WNT_SIGNALING_PATHWAY_AND_PLURIPOTENCY	88	0.409258	1.39783	0.0209872	0.194535	0.173336	3149	tags=31%, list=20%, signal=25%	AXIN2/PPP2CA/CCND1/JUN/LEF1/TCF7/WNT3/FOXD3/POU5F1/FOSL1/RHOA/MAPK10/MYC/FZD10/NFYA/EP300/PPP2CB/ZBTB33/PRKCD/APC/PRKCZ/PPP2R3B/WNT9B/PRKCB/FRAT1/CTBP1/FZD7	27	30.6818
WP_EXERCISEINDUCED_CIRCADIAN_REGULATION	WP_EXERCISEINDUCED_CIRCADIAN_REGULATION	WP_EXERCISEINDUCED_CIRCADIAN_REGULATION	43	0.491904	1.4764	0.0259681	0.234686	0.209111	3186	tags=37%, list=21%, signal=30%	HERPUD1/PER2/PER1/NCOA4/KLF9/TAB2/DAZAP2/NR1D2/CEBPB/PPP2CB/GSTP1/PURA/UGP2/AZIN1/CRY1/CBX3	16	37.2093
WP_MEASLES_VIRUS_INFECTION	WP_MEASLES_VIRUS_INFECTION	WP_MEASLES_VIRUS_INFECTION	100	0.403445	1.40245	0.0275675	0.243064	0.216576	2698	tags=30%, list=17%, signal=25%	FOS/CCND1/JUN/CASP3/TNFAIP3/BBC3/IKBKG/MAPK10/PIK3CA/MSN/CCNE2/RCHY1/TAB2/IRF3/EIF2AK3/NFKBIA/IL6/IL2RB/BCL2L1/CD46/PIK3R1/FADD/MYD88/EIF3H/HSPA1A/NECTIN4/CASP8/IRF9/IRAK1/BAK1	30	30
WP_CARDIAC_PROGENITOR_DIFFERENTIATION	WP_CARDIAC_PROGENITOR_DIFFERENTIATION	WP_CARDIAC_PROGENITOR_DIFFERENTIATION	36	0.534633	1.55024	0.0289919	0.243848	0.217274	4399	tags=56%, list=28%, signal=40%	PDGFRA/TGFB1/POU5F1/LIN28A/THY1/NOTCH1/NODAL/CXCR4/INHBA/FGF2/SOX1/SCN5A/BMP4/IGF2/LIN28B/BMP1/ZFP42/TNNT2/NANOG/TNNI3	20	55.5556
WP_CORI_CYCLE	WP_CORI_CYCLE	WP_CORI_CYCLE	13	0.679308	1.54964	0.0281049	0.243848	0.217274	1874	tags=46%, list=12%, signal=41%	PGK1/G6PD/TALDO1/SLC2A1/ALDOA/TPI1	6	46.1538
WP_LEUCINE_ISOLEUCINE_AND_VALINE_METABOLISM	WP_LEUCINE_ISOLEUCINE_AND_VALINE_METABOLISM	WP_LEUCINE_ISOLEUCINE_AND_VALINE_METABOLISM	23	-0.55502	-1.54263	0.0283914	0.243848	0.217274	2819	tags=48%, list=18%, signal=39%	MMUT/IVD/PCCB/DBT/ECHS1/MCCC2/MCCC1/BCKDHB/HIBCH/ACAD8/BCAT1	11	47.8261
WP_PYRIMIDINE_METABOLISM_AND_RELATED_DISEASES	WP_PYRIMIDINE_METABOLISM_AND_RELATED_DISEASES	WP_PYRIMIDINE_METABOLISM_AND_RELATED_DISEASES	14	-0.633992	-1.54253	0.0291635	0.243848	0.217274	3757	tags=50%, list=24%, signal=38%	CPS1/DPYS/GLS2/NT5C/RRM1/CAD/TYMS	7	50
WP_HYPERTROPHY_MODEL	WP_HYPERTROPHY_MODEL	WP_HYPERTROPHY_MODEL	17	0.623895	1.53483	0.0298543	0.243848	0.217274	1777	tags=41%, list=11%, signal=36%	WDR1/HBEGF/VEGFA/CCN1/JUND/NR4A3/ATF3	7	41.1765
WP_PHOTODYNAMIC_THERAPYINDUCED_UNFOLDED_PROTEIN_RESPONSE	WP_PHOTODYNAMIC_THERAPYINDUCED_UNFOLDED_PROTEIN_RESPONSE	WP_PHOTODYNAMIC_THERAPYINDUCED_UNFOLDED_PROTEIN_RESPONSE	25	0.545862	1.4741	0.0300172	0.243848	0.217274	1981	tags=48%, list=13%, signal=42%	PPP1R15A/NFE2L2/ATF4/BBC3/TRIB3/XBP1/DNAJB9/EDEM1/EIF2AK3/DDIT3/ATF3/DNAJC3	12	48
KEGG_VIRAL_MYOCARDITIS	KEGG_VIRAL_MYOCARDITIS	KEGG_VIRAL_MYOCARDITIS	47	0.472941	1.44729	0.0317455	0.249478	0.222291	3833	tags=34%, list=25%, signal=26%	ACTG1/CCND1/CXADR/CASP3/MYH9/ABL2/ACTB/LAMA2/MYH11/CASP8/HLA-A/RAC2/HLA-G/HLA-C/HLA-DPB1/HLA-E	16	34.0426
WP_AMPLIFICATION_AND_EXPANSION_OF_ONCOGENIC_PATHWAYS_AS_METASTATIC_TRAITS	WP_AMPLIFICATION_AND_EXPANSION_OF_ONCOGENIC_PATHWAYS_AS_METASTATIC_TRAITS	WP_AMPLIFICATION_AND_EXPANSION_OF_ONCOGENIC_PATHWAYS_AS_METASTATIC_TRAITS	13	0.665637	1.51846	0.0330163	0.256675	0.228704	2176	tags=54%, list=14%, signal=46%	LEF1/TCF7/VEGFA/JAG1/VHL/NOTCH1/CXCR4	7	53.8462
KEGG_BIOSYNTHESIS_OF_UNSATURATED_FATTY_ACIDS	KEGG_BIOSYNTHESIS_OF_UNSATURATED_FATTY_ACIDS	KEGG_BIOSYNTHESIS_OF_UNSATURATED_FATTY_ACIDS	21	-0.561979	-1.52966	0.0343366	0.2641	0.235319	3994	tags=43%, list=26%, signal=32%	ACOT2/HSD17B12/ELOVL2/SCD/FADS1/ACOX3/YOD1/HACD2/FADS2	9	42.8571
KEGG_MATURITY_ONSET_DIABETES_OF_THE_YOUNG	KEGG_MATURITY_ONSET_DIABETES_OF_THE_YOUNG	KEGG_MATURITY_ONSET_DIABETES_OF_THE_YOUNG	10	0.731459	1.57059	0.034921	0.265767	0.236805	1975	tags=40%, list=13%, signal=35%	HES1/BHLHA15/MAFA/NR5A2	4	40
WP_TRANSCRIPTIONAL_ACTIVATION_BY_NRF2_IN_RESPONSE_TO_PHYTOCHEMICALS	WP_TRANSCRIPTIONAL_ACTIVATION_BY_NRF2_IN_RESPONSE_TO_PHYTOCHEMICALS	WP_TRANSCRIPTIONAL_ACTIVATION_BY_NRF2_IN_RESPONSE_TO_PHYTOCHEMICALS	14	0.637326	1.47934	0.0370379	0.278942	0.248544	2678	tags=50%, list=17%, signal=41%	NFE2L2/HMOX1/PIK3CA/CEBPB/SLC7A11/GCLC/MAF	7	50
KEGG_INTESTINAL_IMMUNE_NETWORK_FOR_IGA_PRODUCTION	KEGG_INTESTINAL_IMMUNE_NETWORK_FOR_IGA_PRODUCTION	KEGG_INTESTINAL_IMMUNE_NETWORK_FOR_IGA_PRODUCTION	22	0.573055	1.49703	0.0377223	0.281167	0.250527	2220	tags=32%, list=14%, signal=27%	MAP3K14/TGFB1/IL15/LTBR/IL6/CXCR4/TNFRSF13C	7	31.8182
WP_SEROTONIN_RECEPTOR_467_AND_NR3C_SIGNALING	WP_SEROTONIN_RECEPTOR_467_AND_NR3C_SIGNALING	WP_SEROTONIN_RECEPTOR_467_AND_NR3C_SIGNALING	18	0.59602	1.49206	0.0415395	0.300331	0.267602	1635	tags=33%, list=11%, signal=30%	EGR1/ELK1/ATF1/ELK4/SRF/MAPKAPK2	6	33.3333
KEGG_GLYCOSYLPHOSPHATIDYLINOSITOL_GPI_ANCHOR_BIOSYNTHESIS	KEGG_GLYCOSYLPHOSPHATIDYLINOSITOL_GPI_ANCHOR_BIOSYNTHESIS	KEGG_GLYCOSYLPHOSPHATIDYLINOSITOL_GPI_ANCHOR_BIOSYNTHESIS	24	-0.518339	-1.44598	0.0435031	0.301903	0.269003	5612	tags=50%, list=36%, signal=32%	DPM2/PIGB/PIGH/PIGT/PIGV/PIGG/PIGF/PIGK/PIGS/PIGC/PGAP1/PIGN	12	50
WP_CYTOSOLIC_DNASENSING_PATHWAY	WP_CYTOSOLIC_DNASENSING_PATHWAY	WP_CYTOSOLIC_DNASENSING_PATHWAY	46	0.464941	1.42372	0.0438449	0.301903	0.269003	2370	tags=30%, list=15%, signal=26%	ATG12/IKBKG/CYLD/IRF3/NFKBIA/IL6/ISG15/POLR1C/POLR3K/POLR3H/FADD/RIPK1/POLR3F/CASP8	14	30.4348
WP_FAMILIAL_PARTIAL_LIPODYSTROPHY	WP_FAMILIAL_PARTIAL_LIPODYSTROPHY	WP_FAMILIAL_PARTIAL_LIPODYSTROPHY	22	0.563546	1.47219	0.0487365	0.32327	0.288042	1251	tags=32%, list=8%, signal=29%	GATA2/FNTA/LMNA/PIK3CA/KLF9/KLF5/CEBPA	7	31.8182

## Sheet: GSEA_sh_sall3_vs_WT_H_and_C2
	ID	Description	setSize	enrichmentScore	NES	pvalue	p.adjust	qvalue	rank	leading_edge	core_enrichment	size_edge	percent
HALLMARK_TNFA_SIGNALING_VIA_NFKB	HALLMARK_TNFA_SIGNALING_VIA_NFKB	HALLMARK_TNFA_SIGNALING_VIA_NFKB	168	0.637642	2.22567	1e-10	2.5e-09	1.31579e-09	2359	tags=46%, list=15%, signal=39%	DUSP5/JUN/MCL1/CCND1/IER2/BHLHE40/SERPINE1/PHLDA1/FOS/TRIB1/DUSP4/GADD45B/SERPINB8/JUNB/PHLDA2/KLF10/HES1/MAFF/EGR3/DUSP2/INHBA/IFNGR2/SOCS3/RHOB/LDLR/FJX1/PDE4B/FOSL1/ZFP36/NFKBIE/MYC/EGR1/FOSL2/SLC2A3/YRDC/SQSTM1/PLAU/MXD1/EGR2/PFKFB3/PLAUR/TNFAIP3/PER1/LIF/SDC4/JAG1/EFNA1/IL6ST/IER5/PLK2/FUT4/SLC2A6/CCN1/ABCA1/F3/KLF6/ETS2/ZC3H12A/CCNL1/SPHK1/IER3/EIF1/RNF19B/GADD45A/SMAD3/TGIF1/DUSP1/RELB/B4G…	77	45.8333
HALLMARK_MYC_TARGETS_V1	HALLMARK_MYC_TARGETS_V1	HALLMARK_MYC_TARGETS_V1	199	0.593109	2.09436	1e-10	2.5e-09	1.31579e-09	4063	tags=51%, list=26%, signal=38%	SRSF2/POLE3/SRSF7/TRA2B/MCM7/SRSF3/SNRPD1/CNBP/RSL1D1/GNL3/DHX15/AIMP2/ETF1/STARD7/MYC/SRSF1/RRP9/EIF4A1/EIF3J/USP1/HNRNPC/ACP1/SYNCRIP/NCBP2/RAN/G3BP1/EIF4G2/SERBP1/DEK/DDX21/HNRNPA1/BUB3/HNRNPU/DDX18/ILF2/HNRNPD/SNRPB2/KPNB1/CUL1/UBE2L3/EIF2S1/UBA2/CCT2/NOP16/ABCE1/MCM2/MAD2L1/HNRNPR/RAD23B/YWHAE/SET/EEF1B2/NOLC1/RNPS1/RANBP1/MCM5/CTPS1/PCNA/EIF4H/RRM1/PPIA/HDAC2/VBP1/CDC45/PSMB2/HDGF/TXNL4A/PS…	102	51.2563
HALLMARK_MYC_TARGETS_V2	HALLMARK_MYC_TARGETS_V2	HALLMARK_MYC_TARGETS_V2	57	0.722943	2.18307	1.68347e-08	2.80578e-07	1.47673e-07	1587	tags=46%, list=10%, signal=41%	PPAN/NIP7/TFB2M/UNG/WDR43/BYSL/DUSP2/GNL3/AIMP2/MRTO4/MYC/RRP9/PPRC1/RRP12/GRWD1/RCL1/PUS1/PES1/SUPV3L1/WDR74/MPHOSPH10/NDUFAF4/DDX18/NOP2/TMEM97/NOP16	26	45.614
HALLMARK_E2F_TARGETS	HALLMARK_E2F_TARGETS	HALLMARK_E2F_TARGETS	198	0.478121	1.68789	1.42622e-05	0.000178277	9.38302e-05	3440	tags=37%, list=22%, signal=29%	WEE1/SRSF2/UNG/GINS3/RFC3/TRA2B/MCM7/CHEK1/ILF3/ING3/MYC/ORC6/SRSF1/USP1/CDC25A/NUP153/RPA2/SYNCRIP/PPP1R8/RRM2/DSCC1/TFRC/RAN/NBN/DDX39A/POLE/DEK/NUP107/LYAR/HNRNPD/AK2/EIF2S1/RAD1/MCM2/MAD2L1/CNOT9/HMGB3/TRIP13/NUP205/CKS1B/CTCF/NOLC1/RANBP1/MCM5/CTPS1/TIPIN/MCM3/GINS1/BIRC5/PHF5A/PCNA/PNN/SPAG5/UBR7/PSIP1/CDCA8/NASP/POLE4/RFC2/HUS1/PSMC3IP/PPM1D/STMN1/SPC25/XPO1/BRMS1L/PLK4/SUV39H1/RAD51C/DIAP…	74	37.3737
HALLMARK_APOPTOSIS	HALLMARK_APOPTOSIS	HALLMARK_APOPTOSIS	140	0.508915	1.73567	2.55961e-05	0.000182829	9.62258e-05	2440	tags=30%, list=16%, signal=25%	WEE1/JUN/MCL1/CASP3/TNFRSF12A/CCND1/LEF1/CYLD/HMOX1/GADD45B/CASP2/LMNA/EGR3/CTNNB1/PEA15/DNAJA1/RHOB/ETF1/SQSTM1/NEDD9/SMAD7/BID/KRT18/BCL2L1/BCL10/AVPR1A/ERBB2/SLC20A1/PSEN2/IER3/IFNGR1/GADD45A/DIABLO/RARA/ANXA1/TIMP2/BTG3/BCAP31/CLU/PPP3R1/PSEN1/CAV1	42	30
HALLMARK_G2M_CHECKPOINT	HALLMARK_G2M_CHECKPOINT	HALLMARK_G2M_CHECKPOINT	196	0.475924	1.67928	2.20118e-05	0.000182829	9.62258e-05	2404	tags=34%, list=16%, signal=29%	CCND1/SRSF2/TGFB1/EWSR1/TRA2B/RBM14/SNRPD1/SFPQ/CHEK1/SRSF10/KIF5B/DKC1/ILF3/MYC/ORC6/SRSF1/CCNT1/NUMA1/UPF1/CDC25A/SQLE/YTHDC1/RPA2/CUL5/SYNCRIP/CDC6/E2F3/RASAL2/AMD1/G3BP1/SLC38A1/DDX39A/POLE/TLE3/CHAF1A/PRPF4B/E2F1/BUB3/HNRNPU/HNRNPD/KPNB1/ATF5/NUP50/CUL1/TNPO2/HMGN2/MCM2/ATRX/EXO1/SMAD3/MAD2L1/NCL/CASP8AP2/HMGB3/RAD23B/RBL1/CKS1B/CTCF/MT2A/GINS2/NOLC1/MCM5/MCM3/TOP1/CUL4A/PAFAH1B1/BIRC5	67	34.1837
HALLMARK_UV_RESPONSE_UP	HALLMARK_UV_RESPONSE_UP	HALLMARK_UV_RESPONSE_UP	144	0.500804	1.71883	4.45483e-05	0.000278427	0.000146541	3251	tags=33%, list=21%, signal=27%	CASP3/SLC6A8/POLE3/LYN/FOS/HMOX1/JUNB/HYAL2/NUP58/CDC5L/DNAJA1/PRPF3/RHOB/SQSTM1/PPIF/BID/IL6ST/TFRC/FEN1/AMD1/TYRO3/DDX21/NPTX2/HNRNPU/TGFBRAP1/HTR7/OLFM1/FURIN/BAK1/CHKA/E2F5/PRKCD/BTG3/NPTXR/CCND3/CREG1/MAPK8IP2/CNP/TARS1/CYB5B/AGO2/BTG1/NXF1/CTSV/IL6/FGF18/RPN1/NR4A1	48	33.3333
HALLMARK_IL6_JAK_STAT3_SIGNALING	HALLMARK_IL6_JAK_STAT3_SIGNALING	HALLMARK_IL6_JAK_STAT3_SIGNALING	59	0.591306	1.7911	0.00010227	0.000511351	0.000269132	2208	tags=34%, list=14%, signal=29%	JUN/TNFRSF12A/TGFB1/IL4R/HMOX1/MYD88/IFNGR2/SOCS3/STAT3/A2M/IL6ST/PTPN2/IL17RA/PTPN1/IFNGR1/BAK1/TNFRSF1A/LTBR/IL1R1/PTPN11	20	33.8983
HALLMARK_TGF_BETA_SIGNALING	HALLMARK_TGF_BETA_SIGNALING	HALLMARK_TGF_BETA_SIGNALING	53	0.552235	1.65193	0.00253738	0.00906209	0.00476952	3419	tags=55%, list=22%, signal=43%	SERPINE1/TGFB1/JUNB/FNTA/KLF10/CTNNB1/IFNGR2/CDH1/THBS1/SMAD7/TJP1/WWTR1/SLC20A1/FURIN/SMAD3/UBE2D3/TGIF1/ID3/ARID4B/HDAC1/TRIM33/SMAD1/SMURF1/LEFTY2/PPP1CA/PMEPA1/RHOA/SKI/TGFBR1	29	54.717
HALLMARK_CHOLESTEROL_HOMEOSTASIS	HALLMARK_CHOLESTEROL_HOMEOSTASIS	HALLMARK_CHOLESTEROL_HOMEOSTASIS	71	0.516835	1.60211	0.00381166	0.0127055	0.00668712	2314	tags=34%, list=15%, signal=29%	ACTG1/TNFRSF12A/HMGCR/CTNNB1/HMGCS1/LDLR/SQLE/PLAUR/JAG1/AVPR1A/DHCR7/IDI1/CYP51A1/ERRFI1/NSDHL/FDFT1/ATF5/TMEM97/CHKA/STARD4/MVK/CLU/SREBF2/ALCAM	24	33.8028
HALLMARK_ANDROGEN_RESPONSE	HALLMARK_ANDROGEN_RESPONSE	HALLMARK_ANDROGEN_RESPONSE	94	0.469963	1.51502	0.00580092	0.0181279	0.00954099	2410	tags=32%, list=16%, signal=27%	CCND1/DNAJB9/HMGCR/ACTN1/ELK4/INSIG1/ELL2/HMGCS1/SEC24D/SRF/CENPN/CDC14B/NCOA4/UBE2I/MAF/SLC38A2/RRP12/SELENOP/KRT8/IDI1/ADAMTS1/NDRG1/DHCR24/SRP19/SPCS3/MYL12A/TMEM50A/VAPA/CCND3/DBI	30	31.9149
HALLMARK_NOTCH_SIGNALING	HALLMARK_NOTCH_SIGNALING	HALLMARK_NOTCH_SIGNALING	31	0.578876	1.57465	0.0120307	0.0298359	0.0157031	3213	tags=45%, list=21%, signal=36%	CCND1/LFNG/HES1/FZD7/JAG1/FBXW11/CUL1/PSEN2/NOTCH1/FZD5/SKP1/APH1A/ARRB1/DTX2	14	45.1613
HALLMARK_P53_PATHWAY	HALLMARK_P53_PATHWAY	HALLMARK_P53_PATHWAY	187	0.373323	1.31602	0.0394402	0.0788804	0.041516	3238	tags=30%, list=21%, signal=24%	ZFP36L1/JUN/TRAF4/TGFB1/FOS/HMOX1/EPHA2/CDKN2AIP/NOL8/DNTTIP2/TM4SF1/NUDT15/CSRNP2/MXD1/PRKAB1/BAIAP2/SLC19A2/LIF/RCHY1/IER5/HEXIM1/PLK2/SLC35D1/CCNG1/RGS16/NDRG1/PTPN14/TAX1BP3/SPHK1/IRAK1/IER3/RNF19B/GADD45A/BAK1/IP6K2/SFN/NOTCH1/PERP/CCND3/PLK3/TRAFD1/EI24/PCNA/CCNK/STEAP3/PVT1/HBEGF/PDGFA/BTG1/BLCAP/RRP8/PPM1D/ELP1/RAD51C/TRIAP1/TPRKB/MDM2	57	30.4813
KEGG_SPLICEOSOME	KEGG_SPLICEOSOME	KEGG_SPLICEOSOME	125	0.653952	2.19805	1e-10	7.22e-08	5.86316e-08	3845	tags=54%, list=25%, signal=41%	SRSF6/SRSF2/SRSF7/RBM22/DDX42/DDX5/TRA2A/TRA2B/SRSF3/SNRPD1/CDC5L/SRSF10/PRPF3/DHX15/RBM8A/SRSF1/SLU7/HNRNPC/BCAS2/SRSF5/CRNKL1/NCBP2/PUF60/RBM25/RBMX/MAGOHB/ZMAT2/PRPF4/HNRNPA1/HNRNPU/DDX39B/SNRPB2/CWC15/U2AF2/SMNDC1/EIF4A3/HNRNPK/PRPF18/DDX46/SNRPE/BUD31/ALYREF/MAGOH/PHF5A/CHERP/SRSF9/DHX8/ACIN1/PLRG1/CCDC12/THOC2/PRPF38B/TXNL4A/SNRPD3/THOC1/SNRNP70/PRPF6/PPIH/EFTUD2/PCBP1/LSM7/SRSF8/SF3B1/SF3B…	68	54.4
WP_MRNA_PROCESSING	WP_MRNA_PROCESSING	WP_MRNA_PROCESSING	125	0.586593	1.97165	1.0161e-07	3.66812e-05	2.97877e-05	2660	tags=38%, list=17%, signal=32%	SRSF6/SRSF2/SRSF7/DDX20/RBM39/TRA2B/SRSF3/SNRPD1/SFPQ/SRSF10/PRPF3/DHX15/RNMT/DHX9/SRSF1/FUS/PTBP1/HNRNPC/HNRNPH2/HNRNPAB/SRSF5/HNRNPH1/NCBP2/CLP1/CLK1/RBMX/PRPF4B/PRPF4/HNRNPA1/HNRNPU/CELF2/HNRNPD/SNRPB2/PCBP2/U2AF2/HNRNPK/PRPF18/CSTF2T/HNRNPR/SNRPE/SRRM1/RNPS1/SFSWAP/XRN2/PHF5A/SRSF9/DHX8/SNRPN	48	38.4
WP_OVERLAP_BETWEEN_SIGNAL_TRANSDUCTION_PATHWAYS_CONTRIBUTING_TO_LMNA_LAMINOPATHIES	WP_OVERLAP_BETWEEN_SIGNAL_TRANSDUCTION_PATHWAYS_CONTRIBUTING_TO_LMNA_LAMINOPATHIES	WP_OVERLAP_BETWEEN_SIGNAL_TRANSDUCTION_PATHWAYS_CONTRIBUTING_TO_LMNA_LAMINOPATHIES	48	0.6729	1.96902	4.69239e-06	0.000846976	0.000687805	2339	tags=44%, list=15%, signal=37%	LEF1/TGFB1/JUNB/FNTA/LMNA/HES1/KAT2B/CTNNB1/SREBF1/TCF7/CSNK1A1/EMD/ACTB/LEMD3/E2F1/SMAD3/ZMPSTE24/TLE1/NOTCH1/HDAC1/CEBPD	21	43.75
WP_INFLUENCE_OF_LAMINOPATHIES_ON_WNT_SIGNALING	WP_INFLUENCE_OF_LAMINOPATHIES_ON_WNT_SIGNALING	WP_INFLUENCE_OF_LAMINOPATHIES_ON_WNT_SIGNALING	30	0.746277	2.00717	8.53809e-06	0.0012329	0.0010012	751	tags=37%, list=5%, signal=35%	CCND1/LEF1/TOR1AIP1/FNTA/LMNA/HES1/CTNNB1/SREBF1/TCF7/CSNK1A1/EMD	11	36.6667
WP_TGFBETA_RECEPTOR_SIGNALING	WP_TGFBETA_RECEPTOR_SIGNALING	WP_TGFBETA_RECEPTOR_SIGNALING	49	0.673515	1.96977	1.41047e-05	0.00169727	0.0013783	3554	tags=59%, list=23%, signal=46%	JUN/LEF1/SERPINE1/TGFB1/FOS/TGFBR2/CTNNB1/INHBA/STAT3/THBS1/SMAD7/LIF/FST/SMAD3/TGIF1/LEFTY1/TFE3/EP300/ZNF423/SMAD1/TGFBR3/CREBBP/SMAD5/ZFYVE9/LEFTY2/SKI/TGFBR1/STAT1/RUNX3	29	59.1837
WP_TGFBETA_RECEPTOR_SIGNALING_IN_SKELETAL_DYSPLASIAS	WP_TGFBETA_RECEPTOR_SIGNALING_IN_SKELETAL_DYSPLASIAS	WP_TGFBETA_RECEPTOR_SIGNALING_IN_SKELETAL_DYSPLASIAS	53	0.645503	1.919	3.93492e-05	0.00282717	0.00229587	3554	tags=55%, list=23%, signal=42%	JUN/LEF1/SERPINE1/TGFB1/FOS/TGFBR2/CTNNB1/INHBA/STAT3/THBS1/SMAD7/LIF/FST/SMAD3/TGIF1/LEFTY1/TFE3/EP300/ZNF423/SMAD1/TGFBR3/CREBBP/SMAD5/ZFYVE9/LEFTY2/SKI/TGFBR1/STAT1/RUNX3	29	54.717
WP_CIRCADIAN_RHYTHM_GENES	WP_CIRCADIAN_RHYTHM_GENES	WP_CIRCADIAN_RHYTHM_GENES	159	0.489044	1.69185	4.30733e-05	0.00282717	0.00229587	2426	tags=32%, list=16%, signal=27%	PER2/JUN/PSPC1/BHLHE40/SERPINE1/DDX5/KLF10/RBM4B/EGR3/SFPQ/RBM4/NR1D1/BHLHE41/SREBF1/NOCT/FBXL3/DHX9/EGR1/SIRT1/DYRK1A/PRKAA1/CSNK1D/PER1/NR1D2/FBXW11/HOMER1/PPP1CB/CIART/SUV39H2/HNRNPU/HNRNPD/ATF5/CUL1/CRY2/NGFR/HTR7/CCAR2/CHRNB2/SETX/BTBD9/THRAP3/RELB/UBC/ID3/HDAC1/CAVIN3/UBE3A/TOP1/CREB1/SKP1/EP300	51	32.0755
WP_ANDROGEN_RECEPTOR_SIGNALING_PATHWAY	WP_ANDROGEN_RECEPTOR_SIGNALING_PATHWAY	WP_ANDROGEN_RECEPTOR_SIGNALING_PATHWAY	86	0.554273	1.77481	0.000102126	0.0058916	0.0047844	3336	tags=41%, list=22%, signal=32%	JUN/CCND1/PATZ1/KAT2B/CTNNB1/KAT7/RHOB/NCOA4/STAT3/FHL2/UBE2I/KAT5/SIRT1/FLNA/RAN/RNF6/SMAD3/TGIF1/LIMK2/RNF4/HDAC1/UBE3A/DSTN/CREB1/EP300/CAV1/TGFB1I1/CREBBP/PIK3R1/PSMC3IP/CDC42/SUMO1/MDM2/ROCK2/RHOA	35	40.6977
KEGG_STEROID_BIOSYNTHESIS	KEGG_STEROID_BIOSYNTHESIS	KEGG_STEROID_BIOSYNTHESIS	16	0.806274	1.89275	0.000131189	0.00617997	0.00501858	1757	tags=50%, list=11%, signal=44%	SOAT1/MSMO1/SQLE/DHCR7/CYP51A1/NSDHL/FDFT1/DHCR24	8	50
WP_MODULATORS_OF_TCR_SIGNALING_AND_T_CELL_ACTIVATION	WP_MODULATORS_OF_TCR_SIGNALING_AND_T_CELL_ACTIVATION	WP_MODULATORS_OF_TCR_SIGNALING_AND_T_CELL_ACTIVATION	50	0.619732	1.81785	0.000136952	0.00617997	0.00501858	2244	tags=32%, list=15%, signal=27%	ZFP36L1/MAP3K14/RPRD1B/SH2B3/RHOH/TRAF6/RASA2/CUL5/TNFAIP3/BCL10/CHUK/ITK/PCBP2/IKBKG/TMEM222/SMARCB1	16	32
WP_WNT_SIGNALING_PATHWAY_AND_PLURIPOTENCY	WP_WNT_SIGNALING_PATHWAY_AND_PLURIPOTENCY	WP_WNT_SIGNALING_PATHWAY_AND_PLURIPOTENCY	88	0.544635	1.75964	0.000129167	0.00617997	0.00501858	2579	tags=33%, list=17%, signal=28%	JUN/CCND1/LEF1/CTNNB1/MAP2K4/TCF7/PPP2CA/LDLR/FOSL1/MYC/WNT3/CTBP2/PLAU/FOXD3/FZD6/FZD7/NFYA/PPP2CB/PPP2R1B/ZBTB33/PRKCD/CTNND1/CTBP1/FZD5/CCND3/PAFAH1B1/EP300/NANOG/PPP2R2B	29	32.9545
KEGG_CELL_CYCLE	KEGG_CELL_CYCLE	KEGG_CELL_CYCLE	117	0.497185	1.65345	0.000164623	0.00699163	0.0056777	2899	tags=40%, list=19%, signal=33%	WEE1/CCND1/TGFB1/CCNE2/GADD45B/MCM7/CHEK1/CDC14B/MYC/ORC6/CDC25A/CCNB1/CDC6/E2F3/YWHAG/E2F1/BUB3/CDC16/CUL1/GADD45A/MCM2/SMAD3/MAD2L1/PKMYT1/ORC4/CDC14A/ANAPC13/E2F5/RBL1/YWHAE/SFN/ORC1/HDAC1/MCM5/MCM3/CCND3/YWHAZ/SKP1/EP300/ANAPC2/PCNA/HDAC2/MAD2L2/YWHAH/CDC45/CDKN2D/CREBBP	47	40.1709
WP_INTERACTIONS_BETWEEN_IMMUNE_CELLS_AND_MICRORNAS_IN_TUMOR_MICROENVIRONMENT	WP_INTERACTIONS_BETWEEN_IMMUNE_CELLS_AND_MICRORNAS_IN_TUMOR_MICROENVIRONMENT	WP_INTERACTIONS_BETWEEN_IMMUNE_CELLS_AND_MICRORNAS_IN_TUMOR_MICROENVIRONMENT	17	0.797847	1.88995	0.000174566	0.00700203	0.00568615	1744	tags=53%, list=11%, signal=47%	TGFB1/IL4R/TGFBR2/STAT3/TRAF6/IL2RB/STAT6/TLR4/PDCD1	9	52.9412
WP_CELL_CYCLE	WP_CELL_CYCLE	WP_CELL_CYCLE	113	0.505463	1.67317	0.000201201	0.00764563	0.0062088	2855	tags=40%, list=19%, signal=33%	WEE1/CCND1/TGFB1/CCNE2/GADD45B/MCM7/CHEK1/CDC14B/MYC/ORC6/CDC25A/CCNB1/CDC6/E2F3/YWHAG/E2F1/BUB3/CDC16/CUL1/GADD45A/MCM2/SMAD3/PKMYT1/ORC4/CDC14A/ANAPC13/E2F5/RBL1/YWHAE/SFN/ORC1/HDAC1/MCM5/MCM3/CCND3/YWHAZ/SKP1/EP300/ANAPC2/PCNA/HDAC2/MAD2L2/YWHAH/CDC45/CDKN2D	45	39.823
WP_PDGF_PATHWAY	WP_PDGF_PATHWAY	WP_PDGF_PATHWAY	39	0.643384	1.81874	0.00028636	0.00898921	0.00729989	3475	tags=51%, list=23%, signal=40%	JUN/FOS/MAP3K1/PDGFB/MAP2K4/WASL/SRF/TIAM1/STAT3/CHUK/RAF1/ELK1/PTPN11/SHC1/PDGFA/PIK3R1/CDC42/MAPK1/RHOA/STAT1	20	51.2821
WP_CHOLESTEROL_BIOSYNTHESIS_PATHWAY	WP_CHOLESTEROL_BIOSYNTHESIS_PATHWAY	WP_CHOLESTEROL_BIOSYNTHESIS_PATHWAY	15	0.805536	1.86384	0.000354373	0.00984065	0.00799132	1385	tags=60%, list=9%, signal=55%	HMGCR/HMGCS1/MSMO1/SQLE/DHCR7/IDI1/CYP51A1/NSDHL/FDFT1	9	60
WP_CHOLESTEROL_SYNTHESIS_DISORDERS	WP_CHOLESTEROL_SYNTHESIS_DISORDERS	WP_CHOLESTEROL_SYNTHESIS_DISORDERS	17	0.786786	1.86375	0.000350856	0.00984065	0.00799132	2148	tags=59%, list=14%, signal=51%	HMGCR/HMGCS1/MSMO1/SQLE/DHCR7/IDI1/CYP51A1/FDFT1/DHCR24/MVK	10	58.8235
WP_INFLAMMATORY_BOWEL_DISEASE_SIGNALING	WP_INFLAMMATORY_BOWEL_DISEASE_SIGNALING	WP_INFLAMMATORY_BOWEL_DISEASE_SIGNALING	21	0.723675	1.8185	0.000411478	0.0106851	0.00867708	2025	tags=43%, list=13%, signal=37%	JUN/TGFB1/IL4R/STAT3/MAF/STAT6/IFNGR1/TLR4/IL12RB2	9	42.8571
WP_BURN_WOUND_HEALING	WP_BURN_WOUND_HEALING	WP_BURN_WOUND_HEALING	80	0.540962	1.73333	0.000414381	0.0106851	0.00867708	3980	tags=39%, list=26%, signal=29%	CASP3/MYD88/CNN2/LIN28A/INHBA/CD248/TNFAIP3/FST/ACHE/HMGB1/FGFR1/TLR4/TAGLN/SMAD3/SFRP2/CXCR4/TIMP2/CXCL14/SNHG20/TGFB3/IL6/ACTA1/FGFR2/TPT1/COL1A2/COL1A1/TLR3/SNAI2/CXCL1/MIAT/IL15	31	38.75
WP_HAIR_FOLLICLE_DEVELOPMENT_ORGANOGENESIS_PART_2_OF_3	WP_HAIR_FOLLICLE_DEVELOPMENT_ORGANOGENESIS_PART_2_OF_3	WP_HAIR_FOLLICLE_DEVELOPMENT_ORGANOGENESIS_PART_2_OF_3	28	0.702215	1.85397	0.000453155	0.0109059	0.0088564	1486	tags=32%, list=10%, signal=29%	CCND1/LEF1/GTPBP4/CTNNB1/INHBA/MYC/CDH1/PDGFRA/SNAI1	9	32.1429
KEGG_DNA_REPLICATION	KEGG_DNA_REPLICATION	KEGG_DNA_REPLICATION	35	0.661235	1.82781	0.000544064	0.012164	0.00987807	3442	tags=51%, list=22%, signal=40%	POLE3/RFC3/MCM7/RPA2/FEN1/POLE/RNASEH2B/MCM2/MCM5/MCM3/PCNA/RFC5/RNASEH2C/POLE4/RFC2/SSBP1/POLE2/RFC4	18	51.4286
WP_DNA_REPLICATION	WP_DNA_REPLICATION	WP_DNA_REPLICATION	41	0.62866	1.80184	0.000540177	0.012164	0.00987807	2909	tags=44%, list=19%, signal=36%	RFC3/MCM7/ORC6/GMNN/RPA2/CDC6/MCM10/POLE/MCM2/ORC4/UBC/ORC1/MCM5/MCM3/PCNA/RFC5/CDC45/RFC2	18	43.9024
KEGG_ADHERENS_JUNCTION	KEGG_ADHERENS_JUNCTION	KEGG_ADHERENS_JUNCTION	72	0.550569	1.73222	0.000594538	0.0122645	0.00995963	1691	tags=31%, list=11%, signal=27%	ACTG1/LEF1/VCL/ACTN1/TGFBR2/CTNNB1/WASL/TCF7/NECTIN1/CDH1/TJP1/ACTB/BAIAP2/PTPRB/ACP1/ERBB2/PTPN1/NECTIN3/SNAI1/NECTIN2/FGFR1/SMAD3	22	30.5556
KEGG_CYTOSOLIC_DNA_SENSING_PATHWAY	KEGG_CYTOSOLIC_DNA_SENSING_PATHWAY	KEGG_CYTOSOLIC_DNA_SENSING_PATHWAY	29	0.671712	1.78685	0.00104799	0.02045	0.0166069	1746	tags=34%, list=11%, signal=31%	POLR1C/POLR3C/POLR3H/RIPK1/POLR3F/CHUK/POLR3K/POLR3A/IRF3/IKBKG	10	34.4828
WP_1Q211_COPY_NUMBER_VARIATION_SYNDROME	WP_1Q211_COPY_NUMBER_VARIATION_SYNDROME	WP_1Q211_COPY_NUMBER_VARIATION_SYNDROME	26	0.682249	1.77842	0.00137141	0.0260569	0.02116	1423	tags=38%, list=9%, signal=35%	CTNNB1/TJP2/KIRREL1/PRKAB1/PRKAA1/TJP1/OCLN/GJA3/GJA1/PYGO1	10	38.4615
WP_CHOLESTEROL_METABOLISM_WITH_BLOCH_AND_KANDUTSCHRUSSELL_PATHWAYS	WP_CHOLESTEROL_METABOLISM_WITH_BLOCH_AND_KANDUTSCHRUSSELL_PATHWAYS	WP_CHOLESTEROL_METABOLISM_WITH_BLOCH_AND_KANDUTSCHRUSSELL_PATHWAYS	44	0.602911	1.73817	0.00151157	0.0279834	0.0227245	2300	tags=36%, list=15%, signal=31%	HMGCR/HMGCS1/SREBF1/SOAT1/MSMO1/SQLE/DHCR7/IDI1/CYP51A1/ABCA1/NSDHL/CH25H/FDFT1/DHCR24/MVK/SREBF2	16	36.3636
WP_MAPK_SIGNALING_PATHWAY	WP_MAPK_SIGNALING_PATHWAY	WP_MAPK_SIGNALING_PATHWAY	213	0.410711	1.46178	0.00173635	0.0299641	0.024333	3266	tags=33%, list=21%, signal=27%	JUN/CASP3/MAP3K14/TGFB1/FOS/DUSP6/TGFBR2/DUSP4/MAP3K1/PDGFB/ELK4/FGF10/DUSP2/MAP2K4/FGF16/RAP1B/SRF/PPM1B/MYC/PTPN7/TRAF6/RASA2/CACNG8/FLNA/CHUK/DUSP8/RASGRP2/NRAS/MAPKAPK2/MAP4K4/DUSP7/PPP5C/GADD45A/FGFR1/IKBKG/RAF1/RAPGEF2/DUSP1/RELB/TNFRSF1A/FGF19/RRAS2/DUSP9/CACNA1H/ELK1/PRKCD/IL1R1/PPP3R1/MAP3K11/MAPKAPK5/FLNC/MAX/MAP2K7/LAMTOR3/FGF9/CACNA1E/MAPK8IP2/RAP1A/PDGFA/FGF1/STMN1/CDC42/RASGRF1/TGFB…	71	33.3333
WP_STEROL_REGULATORY_ELEMENTBINDING_PROTEINS_SREBP_SIGNALING	WP_STEROL_REGULATORY_ELEMENTBINDING_PROTEINS_SREBP_SIGNALING	WP_STEROL_REGULATORY_ELEMENTBINDING_PROTEINS_SREBP_SIGNALING	63	0.546376	1.66903	0.0019229	0.0322868	0.0262192	2410	tags=40%, list=16%, signal=34%	HMGCR/INSIG1/RNF139/HMGCS1/SEC24D/SREBF1/LDLR/SIRT1/PRKAB1/PRKAA1/GPAM/SQLE/NFYA/PPARGC1B/IDI1/CYP51A1/FDFT1/KPNB1/SEC31A/SAR1B/SAR1A/SREBF2/SEC13/CREB1/DBI	25	39.6825
KEGG_RNA_POLYMERASE	KEGG_RNA_POLYMERASE	KEGG_RNA_POLYMERASE	29	0.650672	1.73088	0.00213664	0.0328116	0.0266454	1794	tags=31%, list=12%, signal=27%	POLR1C/POLR2C/POLR3C/POLR3H/POLR3F/POLR3K/POLR3A/POLR2B/POLR1E	9	31.0345
WP_PATHWAYS_AFFECTED_IN_ADENOID_CYSTIC_CARCINOMA	WP_PATHWAYS_AFFECTED_IN_ADENOID_CYSTIC_CARCINOMA	WP_PATHWAYS_AFFECTED_IN_ADENOID_CYSTIC_CARCINOMA	62	0.54856	1.67511	0.00215394	0.0328116	0.0266454	2962	tags=45%, list=19%, signal=37%	MYCN/MORF4L1/JMJD1C/CHEK1/BRD1/FGF16/MYC/ERBB2/SETD2/UHRF1/TLK1/KANSL1/BCOR/MGA/ATRX/IL17RD/RAF1/NOTCH1/ARID4B/CTBP1/EP300/MAGI1/MAX/ERBIN/KDM6A/CREBBP/NSD1/SRCAP	28	45.1613
WP_HIPPO_SIGNALING_REGULATION_PATHWAYS	WP_HIPPO_SIGNALING_REGULATION_PATHWAYS	WP_HIPPO_SIGNALING_REGULATION_PATHWAYS	86	0.490639	1.57105	0.00218138	0.0328116	0.0266454	3357	tags=37%, list=22%, signal=29%	LEF1/EPHA2/TEAD4/CTNNB1/TCF7/PRKAR1A/TEAD1/CDH10/CDH1/PRKAB1/PRKAA1/PDGFRA/LATS1/YY1AP1/NGFR/FGFR1/SMAD3/GNAS/PRKD3/CDH15/GNAI2/PRKCD/FLT1/PLCB2/PLCB3/TEAD3/LATS2/CDC42/CDH4/FGFR2/RHOA/CDH6	32	37.2093
WP_IL18_SIGNALING_PATHWAY	WP_IL18_SIGNALING_PATHWAY	WP_IL18_SIGNALING_PATHWAY	211	0.400868	1.42384	0.00237724	0.0343273	0.0278762	3518	tags=31%, list=23%, signal=24%	JUN/CASP3/FOS/HMOX1/MYD88/MEPCE/DES/GPAT4/CTNNB1/SOCS3/NFKBIE/RAE1/PRKAA1/ADAMTS5/PTPN7/TRAF6/BID/TNFAIP3/SDC4/BCL2L1/ABCF1/CHUK/DEK/RGS16/FADD/PYGB/ZC3H12A/IRAK1/IER3/KIFC3/RND2/TOMM40/BIN1/NACA/TNFRSF1A/SEMA6D/TNFAIP2/PRKCD/PRCC/MAP2K7/PARP1/STK40/SLC4A7/TRPM7/TRPC4AP/BAZ1B/PIK3R1/HDGF/ITM2C/STMN1/PTMS/CA11/IL6/ACTA1/MEF2A/NR4A1/COL1A2/MAPK1/CCNA2/TMSB4X/HADH/ENO1/COL1A1/CASP8/ARFGAP2/ANP32A	66	31.2796
KEGG_THYROID_CANCER	KEGG_THYROID_CANCER	KEGG_THYROID_CANCER	25	0.670631	1.72967	0.00245586	0.0344582	0.0279825	1363	tags=32%, list=9%, signal=29%	CCND1/LEF1/CTNNB1/TCF7/NCOA4/MYC/CDH1/NRAS	8	32
WP_STATIN_INHIBITION_OF_CHOLESTEROL_PRODUCTION	WP_STATIN_INHIBITION_OF_CHOLESTEROL_PRODUCTION	WP_STATIN_INHIBITION_OF_CHOLESTEROL_PRODUCTION	18	0.723349	1.72776	0.00248175	0.0344582	0.0279825	1385	tags=33%, list=9%, signal=30%	HMGCR/SOAT1/LDLR/SQLE/ABCA1/FDFT1	6	33.3333
WP_NOTCH_SIGNALING	WP_NOTCH_SIGNALING	WP_NOTCH_SIGNALING	40	0.594584	1.69242	0.00278541	0.0365648	0.0296933	3213	tags=45%, list=21%, signal=36%	LFNG/HES1/KAT2B/CTBP2/JAG1/MAML1/NOTCH4/PSEN2/NOTCH1/INPP5K/HDAC1/CTBP1/PSEN1/HDAC2/APH1A/CREBBP/MFNG/DTX2	18	45
WP_CARDIAC_PROGENITOR_DIFFERENTIATION	WP_CARDIAC_PROGENITOR_DIFFERENTIATION	WP_CARDIAC_PROGENITOR_DIFFERENTIATION	36	0.60623	1.68663	0.00278273	0.0365648	0.0296933	2871	tags=39%, list=19%, signal=32%	TGFB1/LIN28A/INHBA/ZFP42/THY1/LIN28B/PDGFRA/NODAL/CXCR4/NOTCH1/SOX1/NANOG/ACTC1/TNNT2	14	38.8889
WP_PDGFRBETA_PATHWAY	WP_PDGFRBETA_PATHWAY	WP_PDGFRBETA_PATHWAY	29	0.637366	1.69549	0.00307614	0.0389645	0.031642	2399	tags=34%, list=16%, signal=29%	JUN/FOS/MAP3K1/MAP2K4/SRF/STAT3/STAT6/RAF1/ELK1/SHC1	10	34.4828
WP_ZINC_HOMEOSTASIS	WP_ZINC_HOMEOSTASIS	WP_ZINC_HOMEOSTASIS	26	0.644646	1.6804	0.00431568	0.0503705	0.0409044	2376	tags=42%, list=15%, signal=36%	SLC30A2/MT1E/MT1M/MTF1/MT1G/MT1H/SLC30A1/MT2A/SLC30A7/MT1F/SLC39A1	11	42.3077
KEGG_MAPK_SIGNALING_PATHWAY	KEGG_MAPK_SIGNALING_PATHWAY	KEGG_MAPK_SIGNALING_PATHWAY	228	0.398855	1.42652	0.00432544	0.0503705	0.0409044	3266	tags=32%, list=21%, signal=26%	DUSP5/JUN/CASP3/MAP3K14/TGFB1/FOS/DUSP6/TGFBR2/DUSP4/MAP3K1/GADD45B/PDGFB/ELK4/FGF10/DUSP2/MAP2K4/FGF16/RAP1B/SRF/PPM1B/MYC/PTPN7/TRAF6/RASA2/CACNG8/PDGFRA/FLNA/CHUK/DUSP8/RASGRP2/NRAS/MAPKAPK2/MAP4K4/DUSP7/PPP5C/GADD45A/FGFR1/IKBKG/RAF1/RAPGEF2/DUSP1/RELB/TNFRSF1A/FGF19/RRAS2/DUSP9/CACNA1H/ELK1/IL1R1/PPP3R1/MAP3K11/MAPKAPK5/FLNC/MAX/MAP2K7/LAMTOR3/FGF9/CACNA1E/MAPK8IP2/RAP1A/PDGFA/FGF1/PLA2G3/ST…	74	32.4561
WP_WNTBETACATENIN_SIGNALING_PATHWAY_IN_LEUKEMIA	WP_WNTBETACATENIN_SIGNALING_PATHWAY_IN_LEUKEMIA	WP_WNTBETACATENIN_SIGNALING_PATHWAY_IN_LEUKEMIA	24	0.665269	1.70021	0.00463718	0.0523132	0.0424821	2059	tags=38%, list=13%, signal=33%	CCND1/LEF1/CTNNB1/CSNK1A1/MYC/FZD6/PYGO1/RARA/JUP	9	37.5
WP_ATM_SIGNALING_PATHWAY	WP_ATM_SIGNALING_PATHWAY	WP_ATM_SIGNALING_PATHWAY	40	0.582924	1.65923	0.0045648	0.0523132	0.0424821	1746	tags=30%, list=11%, signal=27%	JUN/CASP2/CHEK1/TP53BP1/CDC25A/BID/CCNB1/RIPK1/NBN/TLK1/GADD45A/IKBKG	12	30
WP_HEMATOPOIETIC_STEM_CELL_GENE_REGULATION_BY_GABP_ALPHABETA_COMPLEX	WP_HEMATOPOIETIC_STEM_CELL_GENE_REGULATION_BY_GABP_ALPHABETA_COMPLEX	WP_HEMATOPOIETIC_STEM_CELL_GENE_REGULATION_BY_GABP_ALPHABETA_COMPLEX	19	0.704701	1.70612	0.0050145	0.0548556	0.0445467	3149	tags=53%, list=20%, signal=42%	GABPB1/MCL1/DNMT3A/BCL2L1/ETV6/EP300/ZFX/DNMT3B/CREBBP/GABPA	10	52.6316
KEGG_NOTCH_SIGNALING_PATHWAY	KEGG_NOTCH_SIGNALING_PATHWAY	KEGG_NOTCH_SIGNALING_PATHWAY	43	0.572988	1.65074	0.00500089	0.0548556	0.0445467	3213	tags=44%, list=21%, signal=35%	LFNG/HES1/KAT2B/CTBP2/JAG1/MAML1/NOTCH4/CIR1/PSEN2/NOTCH1/HDAC1/CTBP1/PSEN1/EP300/HDAC2/APH1A/CREBBP/MFNG/DTX2	19	44.186
WP_MELATONIN_METABOLISM_AND_EFFECTS	WP_MELATONIN_METABOLISM_AND_EFFECTS	WP_MELATONIN_METABOLISM_AND_EFFECTS	24	0.66141	1.69035	0.00525961	0.0558447	0.0453499	1548	tags=38%, list=10%, signal=34%	PER2/SIRT1/CYP1B1/TRAF6/CSNK1D/PER1/ACHE/CRY2/IRAK1	9	37.5
WP_RETINOBLASTOMA_GENE_IN_CANCER	WP_RETINOBLASTOMA_GENE_IN_CANCER	WP_RETINOBLASTOMA_GENE_IN_CANCER	87	0.478366	1.53961	0.00524082	0.0558447	0.0453499	3442	tags=43%, list=22%, signal=33%	WEE1/CCND1/CCNE2/RFC3/MCM7/CHEK1/MYC/CDC25A/RPA2/CCNB1/E2F3/RRM2/POLE/HMGB1/E2F1/MSH6/NPAT/RAF1/ANLN/CCDC6/ORC1/HDAC1/MCM3/CCND3/PCNA/RRM1/SMC2/RFC5/CDC45/STMN1/RBP1/PLK4/SUV39H1/MDM2/CCNA2/POLE2/RFC4	37	42.5287
WP_ACUTE_VIRAL_MYOCARDITIS	WP_ACUTE_VIRAL_MYOCARDITIS	WP_ACUTE_VIRAL_MYOCARDITIS	67	0.504973	1.5717	0.00561273	0.0587303	0.0476932	3507	tags=37%, list=23%, signal=29%	CASP3/CCND1/TGFB1/CASP2/CXADR/STAT3/ACTB/BID/BCL2L1/KRT8/EIF4G2/CHRAC1/ABL2/TLR4/CXCR4/CAAP1/CREB1/CAV1/PARP1/PIK3R1/IL6/MAPK1/CASP8/STAT1/TLR3	25	37.3134
WP_MODULATION_OF_PI3KAKTMTOR_SIGNALING_BY_BIOACTIVE_SPHINGOLIPIDS	WP_MODULATION_OF_PI3KAKTMTOR_SIGNALING_BY_BIOACTIVE_SPHINGOLIPIDS	WP_MODULATION_OF_PI3KAKTMTOR_SIGNALING_BY_BIOACTIVE_SPHINGOLIPIDS	14	-0.736755	-1.78492	0.00637492	0.0630788	0.0512245	1878	tags=36%, list=12%, signal=31%	PLD1/SPHK2/CERS1/S1PR3/TSC1	5	35.7143
KEGG_PATHOGENIC_ESCHERICHIA_COLI_INFECTION	KEGG_PATHOGENIC_ESCHERICHIA_COLI_INFECTION	KEGG_PATHOGENIC_ESCHERICHIA_COLI_INFECTION	46	0.554045	1.61951	0.00648023	0.0630788	0.0512245	2400	tags=41%, list=16%, signal=35%	ACTG1/EZR/CTNNB1/WASL/ARPC5L/CDH1/OCLN/ACTB/KRT18/ARHGEF2/ARPC4/ARPC3/TLR4/NCL/ARPC5/TUBA1C/TUBB4B/TUBB2A/YWHAZ	19	41.3043
WP_PATHOGENIC_ESCHERICHIA_COLI_INFECTION	WP_PATHOGENIC_ESCHERICHIA_COLI_INFECTION	WP_PATHOGENIC_ESCHERICHIA_COLI_INFECTION	46	0.554045	1.61951	0.00648023	0.0630788	0.0512245	2400	tags=41%, list=16%, signal=35%	ACTG1/EZR/CTNNB1/WASL/ARPC5L/CDH1/OCLN/ACTB/KRT18/ARHGEF2/ARPC4/ARPC3/TLR4/NCL/ARPC5/TUBA1C/TUBB4B/TUBB2A/YWHAZ	19	41.3043
WP_PREIMPLANTATION_EMBRYO	WP_PREIMPLANTATION_EMBRYO	WP_PREIMPLANTATION_EMBRYO	39	0.557215	1.57516	0.00740864	0.066863	0.0542975	4629	tags=59%, list=30%, signal=41%	TEAD4/ZFP42/ZFP36/EGR1/CDH1/MXD1/HNRNPAB/ZFP36L2/E2F5/ATP1A1/NANOG/GATA2/KHSRP/CELF3/DNMT3L/IRF4/FOSB/DPPA3/AQP3/ESRRA/MTA3/PBX1/KLF4	23	58.9744
WP_FERROPTOSIS	WP_FERROPTOSIS	WP_FERROPTOSIS	58	0.514612	1.55462	0.00739846	0.066863	0.0542975	3661	tags=34%, list=24%, signal=26%	HMGCR/HMOX1/GCLC/NCOA4/TFRC/SLC38A1/FDFT1/PRNP/PCBP2/MAP1LC3B/GCLM/STEAP3/AIFM2/BACH1/ACSL3/PHKG2/ACSL6/SLC3A2/PCBP1/CHMP6	20	34.4828
WP_MFAP5_EFFECT_ON_PERMEABILITY_AND_MOTILITY_OF_ENDOTHELIAL_CELLS_VIA_CYTOSKELETON_REARRANGEMENT	WP_MFAP5_EFFECT_ON_PERMEABILITY_AND_MOTILITY_OF_ENDOTHELIAL_CELLS_VIA_CYTOSKELETON_REARRANGEMENT	WP_MFAP5_EFFECT_ON_PERMEABILITY_AND_MOTILITY_OF_ENDOTHELIAL_CELLS_VIA_CYTOSKELETON_REARRANGEMENT	16	0.700484	1.6444	0.00851982	0.0732299	0.0594679	983	tags=31%, list=6%, signal=29%	JUN/VCL/ACTN1/TJP1/PXN	5	31.25
WP_MITOCHONDRIAL_GENE_EXPRESSION	WP_MITOCHONDRIAL_GENE_EXPRESSION	WP_MITOCHONDRIAL_GENE_EXPRESSION	19	0.678818	1.64346	0.00849761	0.0732299	0.0594679	1012	tags=32%, list=7%, signal=30%	GABPB1/TFB2M/TFAM/MTERF1/PPRC1/PPARGC1B	6	31.5789
KEGG_CIRCADIAN_RHYTHM_MAMMAL	KEGG_CIRCADIAN_RHYTHM_MAMMAL	KEGG_CIRCADIAN_RHYTHM_MAMMAL	12	0.746915	1.64656	0.00876098	0.0744168	0.0604317	1481	tags=58%, list=10%, signal=53%	PER2/BHLHE40/NR1D1/BHLHE41/CSNK1D/PER1/CRY2	7	58.3333
WP_ADIPOGENESIS	WP_ADIPOGENESIS	WP_ADIPOGENESIS	105	0.449684	1.47701	0.00905304	0.0760034	0.0617202	3165	tags=37%, list=21%, signal=30%	PLIN2/SERPINE1/TGFB1/GADD45B/LMNA/CTNNB1/SOCS3/SREBF1/STAT3/EGR2/LIF/IL6ST/WWTR1/DLK1/STAT6/KLF7/CYP26A1/E2F1/KLF6/IRS4/GADD45A/SMAD3/ZMPSTE24/RBL1/RARA/ID3/KLF5/CEBPD/CREB1/MBNL1/NRIP1/FRZB/GATA2/MEF2D/PRLR/LPL/IL6/AGPAT2/MEF2A	39	37.1429
WP_SREBF_AND_MIR33_IN_CHOLESTEROL_AND_LIPID_HOMEOSTASIS	WP_SREBF_AND_MIR33_IN_CHOLESTEROL_AND_LIPID_HOMEOSTASIS	WP_SREBF_AND_MIR33_IN_CHOLESTEROL_AND_LIPID_HOMEOSTASIS	16	0.69873	1.64029	0.00954475	0.0792104	0.0643245	1266	tags=44%, list=8%, signal=40%	HMGCR/HMGCS1/SREBF1/LDLR/SIRT1/PRKAA1/ABCA1	7	43.75
KEGG_TGF_BETA_SIGNALING_PATHWAY	KEGG_TGF_BETA_SIGNALING_PATHWAY	KEGG_TGF_BETA_SIGNALING_PATHWAY	75	0.471871	1.49263	0.0097019	0.0795997	0.0646407	3419	tags=43%, list=22%, signal=33%	TGFB1/TGFBR2/INHBA/PPP2CA/MYC/THBS1/SMAD7/FST/PPP2CB/PPP2R1B/CUL1/SMAD3/NODAL/E2F5/RBL1/LEFTY1/ID3/SKP1/EP300/THBS3/ACVR2B/SMAD1/SMURF1/CREBBP/SMAD5/ZFYVE9/TGFB3/LEFTY2/MAPK1/ROCK2/RHOA/TGFBR1	32	42.6667
KEGG_JAK_STAT_SIGNALING_PATHWAY	KEGG_JAK_STAT_SIGNALING_PATHWAY	KEGG_JAK_STAT_SIGNALING_PATHWAY	86	0.458097	1.46685	0.0115507	0.0877851	0.0712878	3197	tags=34%, list=21%, signal=27%	CCND1/SPRY4/IL4R/SPRED1/IFNGR2/SOCS3/SPRY2/STAT3/MYC/SOCS4/LIF/BCL2L1/IL6ST/IL2RB/SPRY1/STAT6/IFNGR1/IL12RB2/SOCS5/PTPN11/CCND3/EP300/IRF9/CREBBP/PIK3R1/PRLR/IL6/CNTF/CISH	29	33.7209
WP_G1_TO_S_CELL_CYCLE_CONTROL	WP_G1_TO_S_CELL_CYCLE_CONTROL	WP_G1_TO_S_CELL_CYCLE_CONTROL	60	0.499908	1.5131	0.0126767	0.0953397	0.0774227	2855	tags=40%, list=19%, signal=33%	WEE1/CCND1/CCNE2/MCM7/MYC/ORC6/CDC25A/RPA2/CCNB1/E2F3/POLE/E2F1/GADD45A/MCM2/ORC4/ORC1/MCM5/MCM3/CCND3/CREB1/PCNA/CREB3L4/CDC45/CDKN2D	24	40
WP_CANONICAL_AND_NONCANONICAL_NOTCH_SIGNALING	WP_CANONICAL_AND_NONCANONICAL_NOTCH_SIGNALING	WP_CANONICAL_AND_NONCANONICAL_NOTCH_SIGNALING	24	0.630063	1.61024	0.0132008	0.0972546	0.0789777	2373	tags=42%, list=15%, signal=35%	LEF1/HES1/JAG1/CHUK/DLK1/MAML1/NOTCH4/PSEN2/NOTCH1/PSEN1	10	41.6667
WP_MYD88_DISTINCT_INPUTOUTPUT_PATHWAY	WP_MYD88_DISTINCT_INPUTOUTPUT_PATHWAY	WP_MYD88_DISTINCT_INPUTOUTPUT_PATHWAY	12	0.717426	1.58155	0.0142668	0.104047	0.0844934	1643	tags=50%, list=11%, signal=45%	JUN/MYD88/TRAF6/UBE2N/IRAK1/TLR4	6	50
WP_NEOVASCULARISATION_PROCESSES	WP_NEOVASCULARISATION_PROCESSES	WP_NEOVASCULARISATION_PROCESSES	35	0.573407	1.58504	0.0150081	0.108358	0.0879947	3490	tags=40%, list=23%, signal=31%	TGFB1/PDGFB/JAG1/NOTCH4/SMAD3/RELB/CXCR4/NOTCH1/SMAD1/SMAD5/TGFB3/MAPK1/TGFBR1/ANGPT1	14	40
WP_NRF2ARE_REGULATION	WP_NRF2ARE_REGULATION	WP_NRF2ARE_REGULATION	22	0.638066	1.61629	0.0153412	0.109667	0.0890572	2003	tags=32%, list=13%, signal=28%	HMOX1/GCLC/AIMP2/MAF/PGAM5/YES1/GCLM	7	31.8182
WP_MAMMARY_GLAND_DEVELOPMENT_PATHWAY_PUBERTY_STAGE_2_OF_4	WP_MAMMARY_GLAND_DEVELOPMENT_PATHWAY_PUBERTY_STAGE_2_OF_4	WP_MAMMARY_GLAND_DEVELOPMENT_PATHWAY_PUBERTY_STAGE_2_OF_4	10	0.759982	1.59754	0.0169342	0.118704	0.0963962	963	tags=40%, list=6%, signal=38%	CCND1/FOSL1/MYC/ERBB2	4	40
WP_DNA_MISMATCH_REPAIR	WP_DNA_MISMATCH_REPAIR	WP_DNA_MISMATCH_REPAIR	23	0.633503	1.61665	0.0174166	0.120912	0.098189	3442	tags=52%, list=22%, signal=41%	POLE3/RFC3/RPA2/POLE/MSH6/EXO1/PCNA/RFC5/POLE4/RFC2/POLE2/RFC4	12	52.1739
WP_APOPTOSIS_MODULATION_BY_HSP70	WP_APOPTOSIS_MODULATION_BY_HSP70	WP_APOPTOSIS_MODULATION_BY_HSP70	18	0.662348	1.58205	0.0185693	0.125299	0.101752	1888	tags=39%, list=12%, signal=34%	CASP3/MAP3K1/CASP2/BID/RIPK1/FADD/TNFRSF1A	7	38.8889
WP_SEROTONIN_RECEPTOR_467_AND_NR3C_SIGNALING	WP_SEROTONIN_RECEPTOR_467_AND_NR3C_SIGNALING	WP_SEROTONIN_RECEPTOR_467_AND_NR3C_SIGNALING	18	0.658277	1.57233	0.0196228	0.129575	0.105224	2737	tags=56%, list=18%, signal=46%	ATF1/ELK4/SRF/EGR1/MAPKAPK2/HTR7/GNAS/ELK1/CREB1/RAP1A	10	55.5556
WP_SPINAL_CORD_INJURY	WP_SPINAL_CORD_INJURY	WP_SPINAL_CORD_INJURY	90	0.440577	1.42768	0.0197413	0.129575	0.105224	3336	tags=32%, list=22%, signal=25%	CASP3/CCND1/TGFB1/FOS/RHOB/ZFP36/MYC/EGR1/CCNG1/E2F1/GJA1/NGFR/GADD45A/TLR4/RTN4/E2F5/ANXA1/IL1R1/RHOC/LGALS3/CDC42/IL6/LTB4R/PDYN/SEMA6A/NR4A1/MAPK1/ROCK2/RHOA	29	32.2222
WP_DEVELOPMENT_OF_URETERIC_COLLECTION_SYSTEM	WP_DEVELOPMENT_OF_URETERIC_COLLECTION_SYSTEM	WP_DEVELOPMENT_OF_URETERIC_COLLECTION_SYSTEM	48	0.501063	1.4662	0.0213225	0.137309	0.111505	3241	tags=33%, list=21%, signal=26%	MYCN/CCND1/CRIM1/CTNNB1/SALL1/ETV4/FST/SPRY1/RARA/SMO/GREB1L/SMAD1/VANGL2/GLI3/CELSR1/FGFR2	16	33.3333
WP_HIPPOMERLIN_SIGNALING_DYSREGULATION	WP_HIPPOMERLIN_SIGNALING_DYSREGULATION	WP_HIPPOMERLIN_SIGNALING_DYSREGULATION	99	0.441122	1.43897	0.022186	0.139289	0.113113	3357	tags=36%, list=22%, signal=29%	CCND1/EPHA2/TEAD4/CTNNB1/PRKAR1A/ITGB8/MYC/TEAD1/CDH10/CDH1/LIN28B/DCAF1/PDGFRA/LATS1/PPP1CB/VGLL4/NRAS/YY1AP1/NGFR/FGFR1/CDH15/PAK4/CUL4A/CCN2/FLT1/TEAD3/LATS2/ITGA5/AJUBA/ITGA7/PPP1R12A/CDH4/PPP1CA/FGFR2/CTNNA1/CDH6	36	36.3636
WP_MEVALONATE_ARM_OF_CHOLESTEROL_BIOSYNTHESIS_PATHWAY	WP_MEVALONATE_ARM_OF_CHOLESTEROL_BIOSYNTHESIS_PATHWAY	WP_MEVALONATE_ARM_OF_CHOLESTEROL_BIOSYNTHESIS_PATHWAY	12	0.69975	1.54258	0.0227496	0.141596	0.114986	2148	tags=42%, list=14%, signal=36%	HMGCR/HMGCS1/IDI1/FDFT1/MVK	5	41.6667
WP_TGFBETA_SIGNALING_PATHWAY	WP_TGFBETA_SIGNALING_PATHWAY	WP_TGFBETA_SIGNALING_PATHWAY	127	0.404893	1.36213	0.0236619	0.143562	0.116583	3419	tags=39%, list=22%, signal=30%	JUN/CCND1/TGFB1/FOS/TGFBR2/JUNB/BCAR1/KLF10/MAP2K4/MYC/UBE2I/THBS1/NEDD9/SMAD7/NUP153/TRAF6/PJA1/YAP1/KLF6/CUL1/SMAD3/TGIF1/RAF1/KLF11/LIMK2/E2F5/RBL1/NEDD4L/HDAC1/SHC1/SKP1/EP300/CAV1/SMURF1/TGFB1I1/TGFBR3/CREBBP/PIK3R1/SNIP1/CDC42/ZFYVE9/MEF2A/PDK1/SUMO1/COL1A2/MAPK1/RHOA/SKI/TGFBR1	49	38.5827
WP_MAPK_AND_NFKB_SIGNALING_PATHWAYS_INHIBITED_BY_YERSINIA_YOPJ	WP_MAPK_AND_NFKB_SIGNALING_PATHWAYS_INHIBITED_BY_YERSINIA_YOPJ	WP_MAPK_AND_NFKB_SIGNALING_PATHWAYS_INHIBITED_BY_YERSINIA_YOPJ	12	0.696833	1.53615	0.0242919	0.145635	0.118266	1792	tags=50%, list=12%, signal=44%	MAP3K14/MAP3K1/TRAF6/CHUK/IKBKG/RAF1	6	50
WP_EICOSANOID_METABOLISM_VIA_CYCLOOXYGENASES_COX	WP_EICOSANOID_METABOLISM_VIA_CYCLOOXYGENASES_COX	WP_EICOSANOID_METABOLISM_VIA_CYCLOOXYGENASES_COX	18	-0.598463	-1.57417	0.0270603	0.153839	0.124928	4712	tags=56%, list=31%, signal=39%	ACOX1/PLA2G4A/PTGR1/PLA2G6/PTGR2/PLA2G4B/PTGFR/AKR1B1/EHHADH/PPARD	10	55.5556
WP_FOCAL_ADHESION	WP_FOCAL_ADHESION	WP_FOCAL_ADHESION	170	0.380494	1.32957	0.0296762	0.16232	0.131815	3413	tags=30%, list=22%, signal=24%	ACTG1/JUN/CCND1/VCL/ACTN1/PDGFB/BCAR1/ZYX/CTNNB1/RAP1B/ITGB8/THBS1/DIAPH1/ACTB/PDGFRA/FLNA/ERBB2/PXN/PPP1CB/RAF1/VASP/ELK1/LAMB1/MYL12A/PARVA/MYLK4/PAK4/CCND3/SHC1/CAV1/FLNC/THBS3/FLT1/PIP5K1C/ACTN4/RAP1A/PDGFA/PIK3R1/ITGA5/ITGA7/CDC42/RASGRF1/PPP1R12A/PPP1CA/LAMC1/COL1A2/MAPK1/ROCK2/RHOA/CAV2/COL1A1	51	30
WP_NOTCH_SIGNALING_PATHWAY	WP_NOTCH_SIGNALING_PATHWAY	WP_NOTCH_SIGNALING_PATHWAY	56	0.486836	1.45297	0.0307632	0.165754	0.134604	2932	tags=34%, list=19%, signal=28%	CCND1/HES1/STAT3/MYC/JAG1/MAML1/NOTCH4/CUL1/CIR1/PSEN2/TLE1/NOTCH1/HDAC1/PSEN1/SKP1/EP300/HDAC2/APH1A/PIK3R1	19	33.9286
WP_AMPLIFICATION_AND_EXPANSION_OF_ONCOGENIC_PATHWAYS_AS_METASTATIC_TRAITS	WP_AMPLIFICATION_AND_EXPANSION_OF_ONCOGENIC_PATHWAYS_AS_METASTATIC_TRAITS	WP_AMPLIFICATION_AND_EXPANSION_OF_ONCOGENIC_PATHWAYS_AS_METASTATIC_TRAITS	13	0.679908	1.52452	0.0324023	0.168306	0.136676	2145	tags=38%, list=14%, signal=33%	LEF1/TCF7/JAG1/CXCR4/NOTCH1	5	38.4615
KEGG_NUCLEOTIDE_EXCISION_REPAIR	KEGG_NUCLEOTIDE_EXCISION_REPAIR	KEGG_NUCLEOTIDE_EXCISION_REPAIR	43	0.503655	1.45099	0.0364265	0.182077	0.147859	4322	tags=53%, list=28%, signal=39%	POLE3/RFC3/RPA2/POLE/XPA/RAD23B/ERCC1/ERCC3/CUL4A/PCNA/ERCC6/CETN2/RFC5/GTF2H1/POLE4/RFC2/POLE2/RFC4/ERCC5/POLD3/DDB1/CDK7/CUL4B	23	53.4884
WP_PROLACTIN_SIGNALING_PATHWAY	WP_PROLACTIN_SIGNALING_PATHWAY	WP_PROLACTIN_SIGNALING_PATHWAY	73	0.434395	1.37077	0.0366032	0.182077	0.147859	3475	tags=33%, list=23%, signal=26%	JUN/CASP3/FOS/SOCS3/STAT3/MYC/YWHAG/FLNA/ERBB2/PXN/PTPN1/AGAP2/RAF1/ELK1/PTPN11/SHC1/YWHAZ/PPIA/PIK3R1/PRLR/CISH/MAPK1/RPS6/STAT1	24	32.8767
WP_NUCLEOTIDE_EXCISION_REPAIR	WP_NUCLEOTIDE_EXCISION_REPAIR	WP_NUCLEOTIDE_EXCISION_REPAIR	44	0.502965	1.45003	0.0392309	0.191383	0.155417	4322	tags=52%, list=28%, signal=38%	POLE3/RFC3/RPA2/POLE/XPA/RAD23B/ERCC1/ERCC3/CUL4A/PCNA/ERCC6/CETN2/RFC5/GTF2H1/POLE4/RFC2/POLE2/RFC4/ERCC5/POLD3/DDB1/CDK7/CUL4B	23	52.2727
WP_PLURIPOTENT_STEM_CELL_DIFFERENTIATION_PATHWAY	WP_PLURIPOTENT_STEM_CELL_DIFFERENTIATION_PATHWAY	WP_PLURIPOTENT_STEM_CELL_DIFFERENTIATION_PATHWAY	30	0.538297	1.44779	0.0403226	0.195226	0.158538	3458	tags=50%, list=22%, signal=39%	TGFB1/PDGFB/FGF10/INHBA/FST/NODAL/LEFTY1/NOTCH1/PDGFA/FGF1/TGFB3/IL6/CNTF/IL11/FGF8	15	50
KEGG_UBIQUITIN_MEDIATED_PROTEOLYSIS	KEGG_UBIQUITIN_MEDIATED_PROTEOLYSIS	KEGG_UBIQUITIN_MEDIATED_PROTEOLYSIS	128	0.395619	1.33154	0.0405594	0.195226	0.158538	3284	tags=31%, list=21%, signal=25%	MAP3K1/UBE2Q1/UBE2B/SOCS3/KLHL9/UBE2I/TRAF6/UBE2Q2/CUL5/RHOBTB2/RCHY1/FBXW11/UBE2N/CDC16/SAE1/UBE2W/CUL1/UBE2L3/UBA2/UBE2D3/TRIP12/UBE2Z/ANAPC13/UBE2D4/NEDD4L/UBE3A/UBR5/CUL4A/SKP1/ANAPC2/UBE2A/UBE4A/MGRN1/SMURF1/UBE3C/ELOC/CUL3/MDM2/ANAPC10/UBE2E3	40	31.25
WP_H19_ACTION_RBE2F1_SIGNALING_AND_CDKBETACATENIN_ACTIVITY	WP_H19_ACTION_RBE2F1_SIGNALING_AND_CDKBETACATENIN_ACTIVITY	WP_H19_ACTION_RBE2F1_SIGNALING_AND_CDKBETACATENIN_ACTIVITY	15	0.646605	1.49611	0.0418198	0.196812	0.159825	2177	tags=53%, list=14%, signal=46%	CCND1/CTNNB1/CDH1/SOX4/JAG1/E2F1/MED1/TULP3	8	53.3333
WP_LUNG_FIBROSIS	WP_LUNG_FIBROSIS	WP_LUNG_FIBROSIS	35	0.532861	1.47296	0.0425149	0.196812	0.159825	3114	tags=37%, list=20%, signal=30%	TGFB1/HMOX1/PDGFB/PARN/PLAU/SMAD7/MECP2/MT2A/CCN2/NFE2L2/PDGFA/FGF1/IL6	13	37.1429
WP_MAMMARY_GLAND_DEVELOPMENT_PATHWAY_PREGNANCY_AND_LACTATION_STAGE_3_OF_4	WP_MAMMARY_GLAND_DEVELOPMENT_PATHWAY_PREGNANCY_AND_LACTATION_STAGE_3_OF_4	WP_MAMMARY_GLAND_DEVELOPMENT_PATHWAY_PREGNANCY_AND_LACTATION_STAGE_3_OF_4	28	0.554656	1.46439	0.0412279	0.196812	0.159825	1348	tags=36%, list=9%, signal=33%	CCND1/ORAI1/GJB2/MYC/PNCK/BCL2L1/ERBB2/CHUK/TTC9/PTPN1	10	35.7143
WP_DYRK1A	WP_DYRK1A	WP_DYRK1A	59	0.456178	1.38319	0.0423601	0.196812	0.159825	2717	tags=34%, list=18%, signal=28%	CASP3/CCND1/HES1/SPRY2/CSNK1A1/SIRT1/DYRK1A/GMNN/TFAP4/CRY2/E2F5/RBL1/NOTCH1/SMARCB1/PSEN1/CREB1/HIP1/H3-3A/RAD54L2/APH1A	20	33.8983
WP_PROSURVIVAL_SIGNALING_OF_NEUROPROTECTIN_D1	WP_PROSURVIVAL_SIGNALING_OF_NEUROPROTECTIN_D1	WP_PROSURVIVAL_SIGNALING_OF_NEUROPROTECTIN_D1	11	0.680233	1.47731	0.0490694	0.214716	0.174365	1888	tags=45%, list=12%, signal=40%	CASP3/RIPK1/PPP2CB/FADD/TNFRSF1A	5	45.4545

## Sheet: GSEA_OE_vs_vub13_H_and_C2
	ID	Description	setSize	enrichmentScore	NES	pvalue	p.adjust	qvalue	rank	leading_edge	core_enrichment	size_edge	percent
HALLMARK_TNFA_SIGNALING_VIA_NFKB	HALLMARK_TNFA_SIGNALING_VIA_NFKB	HALLMARK_TNFA_SIGNALING_VIA_NFKB	166	-0.632376	-2.46255	1e-10	2.5e-09	1.10526e-09	1847	tags=46%, list=12%, signal=41%	GFPT2/SLC16A6/FUT4/SQSTM1/F2RL1/CEBPB/NFKBIA/MARCKS/TNFSF9/PER1/BMP2/CD83/ICAM1/ZBTB10/SPHK1/CXCL3/CLCF1/LITAF/NR4A3/INHBA/KLF9/TGIF1/HBEGF/FOSL2/MXD1/PNRC1/SERPINB8/IFNGR2/YRDC/PFKFB3/NFE2L2/EFNA1/KDM6B/EIF1/VEGFA/TNFAIP3/DUSP1/KLF6/IER3/IL23A/SERPINE1/TRIB1/EGR2/DUSP2/JUN/JAG1/FOSL1/NR4A1/ZFP36/ID2/CCND1/SOCS3/PPP1R15A/DUSP4/SLC2A3/DUSP5/FOSB/RHOB/PHLDA2/IER2/GADD45B/MCL1/TIPARP/ATF3/PDE4B/F3/C…	77	46.3855
HALLMARK_HYPOXIA	HALLMARK_HYPOXIA	HALLMARK_HYPOXIA	179	-0.60406	-2.36415	1e-10	2.5e-09	1.10526e-09	1103	tags=32%, list=7%, signal=30%	NOCT/BCAN/ERRFI1/NCAN/MAP3K1/FOSL2/NDRG1/PGK1/BNIP3L/PNRC1/P4HA1/HMOX1/SLC6A6/FAM162A/HK2/ENO2/PDK1/KDM3A/IGFBP3/GCNT2/PFKFB3/CDKN1C/ALDOC/EFNA1/CAVIN1/VEGFA/TNFAIP3/DUSP1/FOXO3/KLF6/IER3/DDIT4/GPC3/SERPINE1/MT1E/PDGFB/JUN/LDHA/SLC2A1/PGM1/ZFP36/PIM1/KLF7/PPP1R15A/SLC2A3/STC2/PLIN2/MT2A/TIPARP/ATF3/F3/CCN1/MAFF/DDIT3/CCN2/BHLHE40/ADM/FOS	58	32.4022
HALLMARK_E2F_TARGETS	HALLMARK_E2F_TARGETS	HALLMARK_E2F_TARGETS	198	0.44291	1.92145	1.11221e-08	1.85369e-07	8.19526e-08	3757	tags=46%, list=25%, signal=35%	EZH2/STAG1/LMNB1/CDKN1A/GINS1/MELK/CCNE1/PPM1D/ZW10/RRM2/DCTPP1/MMS22L/CCP110/ESPL1/TMPO/DIAPH3/MCM4/BRCA1/CDK1/DNMT1/HMMR/POLD3/RACGAP1/JPT1/MCM6/BUB1B/DDX39A/SRSF1/KIF18B/PDS5B/EED/CTPS1/NME1/MCM3/MSH2/RAD51C/CDC20/LBR/CENPE/GSPT1/CSE1L/NUDT21/SHMT1/UBE2T/DUT/ORC2/MYBL2/SMC3/MLH1/DEPDC1/UBR7/PLK1/TP53/BARD1/NUP153/SMC4/RPA1/XPO1/DCLRE1B/RAD50/HMGB3/AURKB/RFC1/DCK/PAICS/IPO7/SPAG5/TBRG4/DSCC1/NO…	92	46.4646
HALLMARK_INFLAMMATORY_RESPONSE	HALLMARK_INFLAMMATORY_RESPONSE	HALLMARK_INFLAMMATORY_RESPONSE	129	-0.498079	-1.89435	1.22028e-06	1.22028e-05	5.39492e-06	1974	tags=30%, list=13%, signal=26%	LCK/BST2/PSEN1/HRH1/SCN1B/NFKBIA/IL2RB/GNA15/PDPN/TNFSF9/TAPBP/HAS2/ICAM1/SPHK1/CD55/GABBR1/CMKLR1/INHBA/HBEGF/RGS16/MXD1/HPN/ITGA5/SELENOS/LYN/IFNGR2/SLC7A1/IFITM1/KLF6/GPC3/IL4R/SERPINE1/ITGB8/SGMS2/CX3CL1/PDE4B/F3/MYC/ADM	39	30.2326
HALLMARK_TGF_BETA_SIGNALING	HALLMARK_TGF_BETA_SIGNALING	HALLMARK_TGF_BETA_SIGNALING	53	-0.587143	-1.93799	5.15394e-05	0.000429495	0.000189882	726	tags=36%, list=5%, signal=34%	BMP2/SMURF1/TGIF1/CDH1/ARID4B/IFNGR2/CDKN1C/ID1/SERPINE1/FNTA/TGFB1/ID2/WWTR1/PPP1R15A/THBS1/SMAD7/ID3/JUNB/KLF10	19	35.8491
HALLMARK_G2M_CHECKPOINT	HALLMARK_G2M_CHECKPOINT	HALLMARK_G2M_CHECKPOINT	195	0.376042	1.62664	6.13714e-05	0.000438367	0.000193805	2577	tags=34%, list=17%, signal=29%	HSPA8/RAD54L/EZH2/STAG1/LMNB1/SQLE/HIF1A/SLC7A5/PRMT5/FBXO5/ESPL1/UCK2/TMPO/CDK1/TENT4A/TFDP1/ODC1/MAPK14/CDC27/HMMR/RACGAP1/JPT1/MCM6/TPX2/DDX39A/DMD/SRSF1/E2F1/NUP50/KIF23/EXO1/PDS5B/NSD2/KIF20B/MCM3/POLQ/SMC2/HNRNPU/CDC20/DBF4/PAFAH1B1/LBR/CENPE/NUP98/GSPT1/STIL/KNL1/SAP30/CDC7/CUL1/KIF15/MYBL2/PURA/TOP1/TROAP/PLK1/BARD1/KATNA1/FOXN3/SMC4/XPO1/HMGB3/ABL1/AURKB/PML/CCNA2/MAP3K20	67	34.359
HALLMARK_IL6_JAK_STAT3_SIGNALING	HALLMARK_IL6_JAK_STAT3_SIGNALING	HALLMARK_IL6_JAK_STAT3_SIGNALING	58	-0.535928	-1.80204	0.000261592	0.00163495	0.000722821	2749	tags=40%, list=18%, signal=33%	STAT3/HAX1/IL1R1/CD9/STAT2/A2M/CD38/LEPR/MYD88/STAT1/CXCL3/IFNGR1/LTBR/HMOX1/IFNGR2/PLA2G2A/INHBE/IL4R/JUN/TGFB1/PIM1/SOCS3/TNFRSF12A	23	39.6552
HALLMARK_KRAS_SIGNALING_UP	HALLMARK_KRAS_SIGNALING_UP	HALLMARK_KRAS_SIGNALING_UP	132	-0.425898	-1.61821	0.000296101	0.001645	0.000727265	2728	tags=31%, list=18%, signal=26%	ATG10/NIN/SCG3/PRKG2/CCND2/JUP/ACE/EPB41L3/FLT4/ETV4/GFPT2/CAB39L/EPHB2/F2RL1/BTBD3/SCN1B/BMP2/MAFB/PRDM1/SCG5/CMKLR1/INHBA/MAP3K1/HBEGF/MYCN/RGS16/FGF9/IGFBP3/YRDC/IGF2/GPRC5B/TNFAIP3/TRIB1/TMEM158/CBX8/ID2/DNMBP/PPP1R15A/ETV5/SPRY2/DUSP6	41	31.0606
HALLMARK_IL2_STAT5_SIGNALING	HALLMARK_IL2_STAT5_SIGNALING	HALLMARK_IL2_STAT5_SIGNALING	154	-0.411411	-1.57901	0.000587569	0.00293785	0.00129884	2593	tags=32%, list=17%, signal=27%	GPX4/SYNGR2/COCH/RRAGD/CCND2/MUC1/PLEC/AGER/XBP1/FURIN/PTH1R/ETV4/ALCAM/DCPS/SHE/BCL2L1/IL2RB/GABARAPL1/BMP2/GLIPR2/CD83/PRKCH/COL6A1/LRIG1/PRNP/IFNGR1/MYO1C/MYO1E/RHOH/NDRG1/RGS16/MXD1/P4HA1/HK2/SNX9/PTCH1/CDKN1C/KLF6/IL4R/PIM1/SOCS2/SLC2A3/PLIN2/RHOB/GADD45B/MAFF/SPRY4/MYC/BHLHE40/PHLDA1	50	32.4675
HALLMARK_EPITHELIAL_MESENCHYMAL_TRANSITION	HALLMARK_EPITHELIAL_MESENCHYMAL_TRANSITION	HALLMARK_EPITHELIAL_MESENCHYMAL_TRANSITION	166	-0.387139	-1.50757	0.0015288	0.00694907	0.00307222	3611	tags=39%, list=24%, signal=30%	SPOCK1/FZD8/TIMP1/COL5A1/LGALS1/CAPG/IL15/GAS1/COL8A2/GPX7/EDIL3/GPC1/SFRP1/GREM1/BMP1/COL16A1/COL4A2/MATN2/SAT1/QSOX1/BDNF/PDLIM4/NTM/SDC4/CTHRC1/ANPEP/SLIT3/FSTL1/MCM7/PLOD2/LAMA2/FERMT2/CALU/TPM4/FBLN2/GJA1/EFEMP2/LOXL1/IGFBP4/DPYSL3/CDH6/LAMA1/INHBA/ITGA5/ENO2/SLC6A8/LOXL2/COL6A2/IGFBP2/IGFBP3/VEGFA/TNFAIP3/SERPINE1/JUN/NID2/THY1/TGFB1/ID2/RHOB/GADD45B/THBS1/CCN1/TNFRSF12A/CCN2	64	38.5542
HALLMARK_COAGULATION	HALLMARK_COAGULATION	HALLMARK_COAGULATION	87	-0.442562	-1.59653	0.00233194	0.0097164	0.00429567	1986	tags=44%, list=13%, signal=38%	LAMP2/PLAU/LTA4H/HTRA1/KLK8/CFB/TIMP1/CLU/C3/SERPING1/RAPGEF3/RAC1/S100A13/BMP1/GP1BA/CD9/FURIN/C1R/A2M/CRIP2/DPP4/ANG/DUSP14/MST1/CTSB/GSN/WDR1/CTSO/HPN/P2RY1/ARF4/SERPINE1/PDGFB/KLF7/THBS1/F3/MAFF/DUSP6	38	43.6782
HALLMARK_WNT_BETA_CATENIN_SIGNALING	HALLMARK_WNT_BETA_CATENIN_SIGNALING	HALLMARK_WNT_BETA_CATENIN_SIGNALING	37	-0.542432	-1.66671	0.00494432	0.0159403	0.0070473	2520	tags=41%, list=17%, signal=34%	NOTCH1/CCND2/JAG2/CSNK1E/NKD1/FRAT1/TCF7/HDAC5/HEY2/PTCH1/JAG1/LEF1/DLL1/AXIN2/MYC	15	40.5405
HALLMARK_KRAS_SIGNALING_DN	HALLMARK_KRAS_SIGNALING_DN	HALLMARK_KRAS_SIGNALING_DN	110	-0.395667	-1.46422	0.00520631	0.0159403	0.0070473	3798	tags=42%, list=25%, signal=31%	NRIP2/MTHFR/ACTC1/IDUA/KLK8/COL2A1/GTF3C5/CCNA1/THNSL2/GRID2/CAMK1D/MACROH2A2/CLSTN3/PDE6B/ADRA2C/CELSR2/GP1BA/DTNB/FGF16/KCNN1/DCC/SLC5A5/IRS4/EFHD1/SNCB/HSD11B2/GPR3/TNNI3/PRODH/RYR1/SLC38A3/SLC30A3/HTR1D/GPRC5C/NPHS1/MX1/CACNA1F/YPEL1/KLHDC8A/YBX2/IGFBP2/MFSD6/PDCD1/FGFR3/SYNPO/LFNG	46	41.8182
HALLMARK_APICAL_JUNCTION	HALLMARK_APICAL_JUNCTION	HALLMARK_APICAL_JUNCTION	172	-0.369937	-1.44626	0.00479884	0.0159403	0.0070473	2929	tags=32%, list=20%, signal=26%	BMP1/COL16A1/NRXN2/CERCAM/CNN2/CLDN11/PKD1/SORBS3/SYMPK/GRB7/CDH3/CADM3/MAPK11/SHC1/JUP/SDC3/LAYN/MDK/DSC3/EXOC4/SHROOM2/NECTIN1/GNAI2/CD99/COL9A1/INPPL1/RRAS/SIRPA/WASL/CADM2/NECTIN2/VCL/ADAMTS5/ICAM1/CLDN7/CLDN9/CRAT/PIK3R3/CNTN1/TMEM8B/SLC30A3/ACTG1/MADCAM1/AMH/PCDH1/CDH6/ZYX/CDH1/VASP/PBX2/NLGN2/ACTN3/LIMA1/THY1/CX3CL1	55	31.9767
HALLMARK_MYOGENESIS	HALLMARK_MYOGENESIS	HALLMARK_MYOGENESIS	150	-0.373926	-1.43328	0.00476327	0.0159403	0.0070473	2900	tags=33%, list=19%, signal=27%	TPD52L1/COL4A2/FABP3/ITGA7/SCHIP1/SH3BGR/KLF5/LARGE1/SORBS3/FKBP1B/SYNGR2/NOTCH1/SOD3/ACHE/PYGM/MYOZ1/ATP2A1/MRAS/GAA/LAMA2/TNNT1/OCEL1/GSN/TEAD4/SMTN/CKB/DMPK/MEF2D/RYR1/CRAT/SPHK1/PRNP/PTP4A3/MYO1C/IFRD1/HDAC5/CACNA1H/HBEGF/FST/SLC6A8/COL6A2/IGFBP3/HRC/ACTN3/TGFB1/DES/WWTR1/STC2/GADD45B/BHLHE40	50	33.3333
HALLMARK_MYC_TARGETS_V2	HALLMARK_MYC_TARGETS_V2	HALLMARK_MYC_TARGETS_V2	57	0.442933	1.56899	0.00702894	0.0178965	0.00791213	3741	tags=60%, list=25%, signal=45%	SLC29A2/UTP20/DCTPP1/RRP12/MYBBP1A/MCM4/TCOF1/SORD/IPO4/FARSA/SRM/RABEPK/HSPD1/NOP16/PES1/PLK1/PPRC1/IMP4/RRP9/TBRG4/HSPE1/NOP56/TMEM97/PA2G4/NOP2/NOC4L/RCL1/NOLC1/EXOSC5/PUS1/MPHOSPH10/SLC19A1/PRMT3/CDK4	34	59.6491
HALLMARK_NOTCH_SIGNALING	HALLMARK_NOTCH_SIGNALING	HALLMARK_NOTCH_SIGNALING	31	-0.536496	-1.62048	0.00846991	0.0201665	0.0089157	282	tags=39%, list=2%, signal=38%	PRKCA/FBXW11/ARRB1/NOTCH1/FZD5/HEYL/FZD7/JAG1/DLL1/CCND1/LFNG/HES1	12	38.7097
HALLMARK_REACTIVE_OXYGEN_SPECIES_PATHWAY	HALLMARK_REACTIVE_OXYGEN_SPECIES_PATHWAY	HALLMARK_REACTIVE_OXYGEN_SPECIES_PATHWAY	47	-0.458044	-1.47793	0.0175497	0.0381514	0.0168669	2640	tags=34%, list=18%, signal=28%	LAMTOR5/PRDX1/GPX4/SBNO2/NDUFB4/OXSR1/SCAF4/CDKN2D/SRXN1/TXNRD2/EGLN2/PRNP/HHEX/PDLIM1/SELENOS/JUNB	16	34.0426
HALLMARK_ALLOGRAFT_REJECTION	HALLMARK_ALLOGRAFT_REJECTION	HALLMARK_ALLOGRAFT_REJECTION	113	-0.366395	-1.35892	0.0227962	0.047492	0.0209965	3598	tags=40%, list=24%, signal=30%	MTIF2/TIMP1/HLA-DRA/CAPG/IL15/CD1D/HLA-G/MAP4K1/TPD52/CD40/RPS9/SOCS5/B2M/AKT1/CCND2/ACHE/HLA-A/SIT1/RPL3L/LCK/HLA-E/PRKCG/CFP/HLA-DOA/IL2RB/TAPBP/STAT1/ICAM1/CD74/CD4/IL27RA/LY75/HCLS1/IFNGR1/BCL10/PRKCB/INHBA/INHBB/ITK/LYN/IFNGR2/IL11/IL4R/THY1/TGFB1	45	39.823
HALLMARK_MITOTIC_SPINDLE	HALLMARK_MITOTIC_SPINDLE	HALLMARK_MITOTIC_SPINDLE	199	0.290357	1.25734	0.0351315	0.0627348	0.0277354	3227	tags=32%, list=22%, signal=26%	LMNB1/SSH2/SOS1/SAC3D1/FBXO5/CLIP1/NCK1/ESPL1/KIF3B/WASF1/CDK1/TUBD1/TSC1/PCM1/CDC27/RACGAP1/ARHGAP10/TPX2/CD2AP/KIF23/CDC42BPA/PDLIM5/KIF20B/ABI1/DLG1/ROCK1/DOCK4/APC/PAFAH1B1/CENPE/PALLD/CEP57/ANLN/HOOK3/PIF1/RASA1/RABGAP1/MID1/ARHGAP5/KIF15/SMC3/NCK2/PLK1/FGD6/KATNA1/SMC4/STAU1/ABL1/NET1/RFC1/ARFIP2/ARHGAP4/CEP250/PRC1/GEMIN4/CEP131/TTK/INCENP/RICTOR/KIFAP3/ARHGAP29/AURKA/SHROOM1/ARHGDIA	64	32.1608
KEGG_RIBOSOME	KEGG_RIBOSOME	KEGG_RIBOSOME	85	-0.611355	-2.16762	6.97469e-09	4.97993e-06	4.06735e-06	4989	tags=78%, list=33%, signal=52%	RPS7/RPSA/RPS27A/RPLP0/RPS15A/RPS29/RPL34/RPS19/RPLP2/RPS3/RPL27/RPS10/RPL9/RPS20/RPL26/RPL18/RPL19/RPL21/RPS27/RPL31/RPL30/RPL29/RPS15/RPS23/RPL23A/RPS24/RPL7/RPL41/RPL35A/RPS17/RPS28/RPL18A/RPL23/RPL27A/RPL17/RPL4/RPL37/RPS6/RPS9/RPS11/RPL6/RPL35/RPL36/RPL24/RPL10A/RPL37A/RPS25/RPL8/RPS2/RPL5/RPL11/RPS8/RPS16/RPL36A/RPL38/RPL28/RPL32/RPL3L/RSL24D1/RPL22/RPL7A/RPL13/RPL15/RPL13A/RPL3/RPL12	66	77.6471
WP_GENES_RELATED_TO_PRIMARY_CILIUM_DEVELOPMENT_BASED_ON_CRISPR	WP_GENES_RELATED_TO_PRIMARY_CILIUM_DEVELOPMENT_BASED_ON_CRISPR	WP_GENES_RELATED_TO_PRIMARY_CILIUM_DEVELOPMENT_BASED_ON_CRISPR	102	0.497678	1.94708	5.67318e-07	0.000143268	0.000117014	3987	tags=49%, list=27%, signal=36%	CEP97/MKKS/TRAF3IP1/BBS12/KIAA0753/KIF3B/TUBD1/CEP83/CEP162/RPGRIP1L/FBF1/TMEM107/KIF3A/C2CD3/CEP43/ARL6/EFCAB7/PIBF1/BBS10/TEDC2/CILK1/CEP76/IFT57/TTC21B/TXNDC15/EVC/CIBAR1/IFT172/CEP104/RAB23/TCTN3/CPLANE1/TTC30B/DYNC2I2/IFT52/TTBK2/WDPCP/CDK20/KIFAP3/IFT20/CEP44/CEP295/TULP3/BBS7/IQCE/TCTN1/IFT81/TTC23/SCLT1/IFT88	50	49.0196
WP_NUCLEAR_RECEPTORS_METAPATHWAY	WP_NUCLEAR_RECEPTORS_METAPATHWAY	WP_NUCLEAR_RECEPTORS_METAPATHWAY	211	-0.44114	-1.77276	6.01966e-07	0.000143268	0.000117014	2493	tags=30%, list=17%, signal=26%	PRDX1/AIP/SPRY1/SLC39A11/SOD3/IRS2/AGER/SLC5A5/ABCB4/GCC1/CPT1A/SLC2A10/MFGE8/DNAJC15/SLCO1B1/SRXN1/SQSTM1/SLC7A11/JUND/TNS4/ZIC2/SLC39A9/CYP1A1/TXNRD3/MAFG/EHHADH/CBR3/GPAM/HBEGF/HMOX1/EPHA2/SLC6A6/SLC6A8/GSTA4/SCNN1A/GPR153/CPT2/LRRC8A/CDKN1C/NFE2L2/TNFAIP3/TSC22D3/IL11/PDGFB/JUN/TGFB1/TGFBR2/KAT2B/SLC2A1/ENC1/CCND1/SLC2A3/CYP1B1/GADD45B/SERPINB9/PDE4B/MAFF/JUNB/MYC/FGF19/BHLHE40/HES1/CDC42EP3/…	64	30.3318
KEGG_MAPK_SIGNALING_PATHWAY	KEGG_MAPK_SIGNALING_PATHWAY	KEGG_MAPK_SIGNALING_PATHWAY	224	-0.435407	-1.75942	1.17454e-06	0.000209655	0.000171235	2592	tags=31%, list=17%, signal=26%	RASGRP4/IL1R1/MAPK11/CACNA1G/CACNA1C/AKT1/FGF16/RASA2/CACNB3/PRKACA/MRAS/RPS6KA2/NRAS/TRAF6/ELK1/MAP3K11/RRAS/MAPK10/DUSP14/JUND/NFATC4/PRKCG/TAB2/RASGRF1/MKNK2/CACNG6/CHP2/PLA2G6/FGF11/HSPA2/PPM1B/PRKCB/DUSP9/FGF18/CACNA1H/MAP3K1/CACNA1F/FGF9/CACNB1/PTPN7/SRF/CACNG8/CACNG7/PLA2G2A/DUSP1/ATF4/ELK4/FGFR1/RASGRP2/FGFR3/DUSP2/PDGFB/JUN/FGFR2/TGFB1/TGFBR2/NR4A1/PDGFRA/DUSP8/CACNA2D2/DUSP4/PDGFA/MAP3K…	70	31.25
WP_DNA_IRDAMAGE_AND_CELLULAR_RESPONSE_VIA_ATR	WP_DNA_IRDAMAGE_AND_CELLULAR_RESPONSE_VIA_ATR	WP_DNA_IRDAMAGE_AND_CELLULAR_RESPONSE_VIA_ATR	81	0.526559	2.00284	2.45697e-06	0.000299584	0.000244685	2567	tags=38%, list=17%, signal=32%	CLSPN/PPM1D/FOXM1/BRCC3/RMI1/BRCA1/CDK1/BRIP1/SMARCAL1/E2F1/EXO1/UIMC1/RAD52/MSH2/CLK2/BCL6/FANCA/FANCI/CEP164/MLH1/SMARCC2/PLK1/TP53/BARD1/RFWD3/RPA1/TP53BP1/RAD50/PML/CDK2/TOP3A	31	38.2716
WP_CYTOPLASMIC_RIBOSOMAL_PROTEINS	WP_CYTOPLASMIC_RIBOSOMAL_PROTEINS	WP_CYTOPLASMIC_RIBOSOMAL_PROTEINS	87	-0.550893	-1.96348	2.51751e-06	0.000299584	0.000244685	4657	tags=76%, list=31%, signal=53%	RPS7/RPSA/RPS27A/RPLP0/RPS15A/RPS29/RPL34/RPS19/RPLP2/RPS3/RPL27/RPS10/RPL9/RPS20/RPL26/RPL18/RPL19/RPL21/RPS27/RPL31/RPL30/RPL29/RPS15/RPS23/RPL23A/RPS24/RPL7/RPL41/RPL35A/RPS17/RPS28/RPL18A/RPL23/RPL27A/RPL17/RPL4/RPL37/RPS6/RPS9/RPS11/RPL6/RPL35/RPL36/RPL24/RPL10A/RPL37A/RPS25/RPL8/RPS2/RPL5/RPL11/RPS8/RPS16/RPL36A/RPL38/RPL28/RPS6KA2/RPL32/RPL3L/RPL22/RPL7A/RPL13/RPL15/RPL13A/RPL3/RPL12	66	75.8621
WP_HAIR_FOLLICLE_DEVELOPMENT_CYTODIFFERENTIATION_PART_3_OF_3	WP_HAIR_FOLLICLE_DEVELOPMENT_CYTODIFFERENTIATION_PART_3_OF_3	WP_HAIR_FOLLICLE_DEVELOPMENT_CYTODIFFERENTIATION_PART_3_OF_3	56	-0.598701	-1.98757	6.67699e-06	0.000595921	0.000486717	2049	tags=38%, list=14%, signal=32%	KLK13/MSX2/SOX2/IGFBP5/BMPR1A/GTPBP4/NFATC1/LRIG1/GATA3/DLX3/KLK6/FST/HR/PROM1/EGR2/JUN/LEF1/FOSB/CCN2/PHLDA1/FOS	21	37.5
KEGG_CYTOKINE_CYTOKINE_RECEPTOR_INTERACTION	KEGG_CYTOKINE_CYTOKINE_RECEPTOR_INTERACTION	KEGG_CYTOKINE_CYTOKINE_RECEPTOR_INTERACTION	115	-0.497635	-1.86571	1.11056e-05	0.00084147	0.000687269	1896	tags=30%, list=13%, signal=27%	TNFRSF13C/TNFRSF10D/LEPR/BMPR1A/TNFRSF10B/IL6R/INHBC/IL2RB/TNFSF9/TNFRSF25/BMP2/CXCL3/CLCF1/IFNGR1/AMH/LTBR/INHBA/PLEKHO2/INHBB/IFNGR2/IL12RB2/INHBE/VEGFA/KDR/IL11/IL4R/IL23A/PDGFB/TGFB1/TGFBR2/CXCL5/PDGFRA/PDGFA/CX3CL1/TNFRSF12A	35	30.4348
WP_CILIOPATHIES	WP_CILIOPATHIES	WP_CILIOPATHIES	164	0.419093	1.78535	1.17853e-05	0.00084147	0.000687269	3478	tags=37%, list=23%, signal=28%	PIK3R4/TRIM32/MKKS/TRAF3IP1/XPNPEP3/TMEM237/BBS12/KIAA0753/LCA5/CEP78/CEP83/RPGRIP1L/TUB/INTU/FAM161A/ZNF423/DNAAF2/GLI2/TMEM107/EFHC1/TTLL5/C2CD3/HYLS1/ARL6/TMEM138/CEP164/DDX59/PIBF1/KIAA0586/BBS10/CILK1/TBC1D32/IFT57/TTC21B/NEK1/EVC/IFT172/CEP104/RAB23/TCTN3/CPLANE1/RP2/ARL2BP/AHI1/DNAAF5/DYNC2I2/NME7/IFT52/TTBK2/POC1A/CCNQ/WDPCP/OCRL/CEP290/DNAAF4/SDCCAG8/NEK2/CEP41/UNC119/BBS7	60	36.5854
WP_CHOLESTEROL_SYNTHESIS_DISORDERS	WP_CHOLESTEROL_SYNTHESIS_DISORDERS	WP_CHOLESTEROL_SYNTHESIS_DISORDERS	17	0.811579	2.1847	1.41646e-05	0.00091941	0.000750926	1396	tags=59%, list=9%, signal=53%	MSMO1/SQLE/HMGCS1/MVK/HMGCR/IDI1/DHCR24/MVD/CYP51A1/LBR	10	58.8235
WP_HAIR_FOLLICLE_DEVELOPMENT_ORGANOGENESIS_PART_2_OF_3	WP_HAIR_FOLLICLE_DEVELOPMENT_ORGANOGENESIS_PART_2_OF_3	WP_HAIR_FOLLICLE_DEVELOPMENT_ORGANOGENESIS_PART_2_OF_3	27	-0.721631	-2.05062	2.29028e-05	0.00125789	0.00102738	1189	tags=41%, list=8%, signal=38%	GTPBP4/INHBA/CDH1/PTCH1/FGFR2/LEF1/PDGFRA/CCND1/PDGFA/SNAI1/MYC	11	40.7407
WP_CHOLESTEROL_BIOSYNTHESIS_PATHWAY	WP_CHOLESTEROL_BIOSYNTHESIS_PATHWAY	WP_CHOLESTEROL_BIOSYNTHESIS_PATHWAY	15	0.776442	1.99383	0.000118045	0.00526778	0.00430245	1811	tags=60%, list=12%, signal=53%	MSMO1/SQLE/HMGCS1/MVK/HMGCR/IDI1/MVD/CYP51A1/NSDHL	9	60
WP_PREIMPLANTATION_EMBRYO	WP_PREIMPLANTATION_EMBRYO	WP_PREIMPLANTATION_EMBRYO	39	-0.610594	-1.85518	0.000134612	0.00533962	0.00436113	1753	tags=41%, list=12%, signal=36%	SOX2/SOX8/DNMT3L/TEAD4/GATA3/CDH1/MXD1/NANOG/IRX5/MTA3/ZFP36/ZFP36L2/FOSB/DDIT3/GATA2/EGR1	16	41.0256
WP_RETINOBLASTOMA_GENE_IN_CANCER	WP_RETINOBLASTOMA_GENE_IN_CANCER	WP_RETINOBLASTOMA_GENE_IN_CANCER	87	0.46062	1.7635	0.000129109	0.00533962	0.00436113	2597	tags=45%, list=17%, signal=37%	RB1/CDKN1A/CCNE1/SKP2/TYMS/RRM2/RFC5/MCM4/CDK1/TFDP1/DNMT1/POLD3/CCDC6/MCM6/POLE2/E2F1/TFDP2/POLA1/RBBP4/MCM3/SMC2/FANCG/RABIF/ANLN/RRM1/DHFR/SAP30/CDC7/SMC3/TP53/PRMT2/BARD1/FAF1/SIN3A/RPA1/ABL1/CDK2/CCNA2/DCK	39	44.8276
WP_INFLAMMATORY_BOWEL_DISEASE_SIGNALING	WP_INFLAMMATORY_BOWEL_DISEASE_SIGNALING	WP_INFLAMMATORY_BOWEL_DISEASE_SIGNALING	23	-0.699728	-1.90655	0.000167692	0.00630168	0.00514689	1277	tags=43%, list=9%, signal=40%	STAT1/NFATC1/GATA3/IFNGR1/IL12RB2/IL4R/IL23A/JUN/TGFB1/MAF	10	43.4783
WP_CARDIAC_PROGENITOR_DIFFERENTIATION	WP_CARDIAC_PROGENITOR_DIFFERENTIATION	WP_CARDIAC_PROGENITOR_DIFFERENTIATION	34	-0.628062	-1.87179	0.000215317	0.0074888	0.00611646	2520	tags=50%, list=17%, signal=42%	NOTCH1/SCN5A/ANPEP/IRX4/SOX2/SIRPA/SOX1/TNNI3/LIN28A/INHBA/LIN28B/NANOG/IGF2/KDR/THY1/TGFB1/PDGFRA	17	50
KEGG_JAK_STAT_SIGNALING_PATHWAY	KEGG_JAK_STAT_SIGNALING_PATHWAY	KEGG_JAK_STAT_SIGNALING_PATHWAY	88	-0.47937	-1.71465	0.000220259	0.0074888	0.00611646	2531	tags=36%, list=17%, signal=30%	SOCS5/SPRY1/AKT1/CCND2/STAT6/STAT2/STAT5A/LEPR/BCL2L1/CBLC/IL6R/IL2RB/STAT1/PIK3R3/CLCF1/JAK3/IFNGR1/SOCS4/IFNGR2/IL12RB2/IL11/IL4R/IL23A/SPRED1/PIM1/CCND1/SOCS3/SOCS2/PIK3R1/SPRY2/SPRY4/MYC	32	36.3636
WP_OMEGA9_FATTY_ACID_SYNTHESIS	WP_OMEGA9_FATTY_ACID_SYNTHESIS	WP_OMEGA9_FATTY_ACID_SYNTHESIS	13	0.771722	1.91514	0.000330975	0.0102025	0.00833287	2209	tags=54%, list=15%, signal=46%	FADS2/ELOVL2/ELOVL1/SCD/ACSL3/ACSL4/ELOVL6	7	53.8462
WP_CHOLESTEROL_METABOLISM_WITH_BLOCH_AND_KANDUTSCHRUSSELL_PATHWAYS	WP_CHOLESTEROL_METABOLISM_WITH_BLOCH_AND_KANDUTSCHRUSSELL_PATHWAYS	WP_CHOLESTEROL_METABOLISM_WITH_BLOCH_AND_KANDUTSCHRUSSELL_PATHWAYS	44	0.550693	1.83896	0.000342941	0.0102025	0.00833287	1811	tags=39%, list=12%, signal=34%	MSMO1/SQLE/HMGCS1/FADS2/MVK/HSD17B7/HMGCR/IDI1/ELOVL2/DHCR24/SCD/MVD/CYP51A1/ACSL3/LBR/ACSL4/NSDHL	17	38.6364
KEGG_PROTEASOME	KEGG_PROTEASOME	KEGG_PROTEASOME	41	0.555305	1.82922	0.000424853	0.0111658	0.00911965	4111	tags=54%, list=27%, signal=39%	PSME3/PSMD14/PSMA7/PSMC4/PSMD11/PSMC2/PSMD2/PSME4/PSMD1/PSMC6/PSMC5/PSMA5/PSMD4/PSMF1/PSMC3/PSMB5/PSMD13/PSMA1/PSMB3/PSMD3/PSME2/PSMD6	22	53.6585
WP_NEUROGENESIS_REGULATION_IN_THE_OLFACTORY_EPITHELIUM	WP_NEUROGENESIS_REGULATION_IN_THE_OLFACTORY_EPITHELIUM	WP_NEUROGENESIS_REGULATION_IN_THE_OLFACTORY_EPITHELIUM	46	-0.556479	-1.7612	0.000437875	0.0111658	0.00911965	2749	tags=37%, list=18%, signal=30%	STAT3/BDNF/NOTCH1/NGFR/PSEN1/VLDLR/SOX2/NDEL1/NUMBL/SEMA4A/RET/ID1/JAG1/ID2/DLL1/MYC/HES1	17	36.9565
WP_DEVELOPMENT_OF_URETERIC_COLLECTION_SYSTEM	WP_DEVELOPMENT_OF_URETERIC_COLLECTION_SYSTEM	WP_DEVELOPMENT_OF_URETERIC_COLLECTION_SYSTEM	46	-0.546737	-1.73036	0.000803548	0.0168745	0.0137822	1892	tags=33%, list=13%, signal=29%	ETV4/BMPR1A/CELSR1/CRIM1/BMP2/GATA3/RARA/ROBO1/MYCN/FST/RET/GPC3/FGFR2/CCND1/SALL1	15	32.6087
WP_PHOTODYNAMIC_THERAPYINDUCED_HIF1_SURVIVAL_SIGNALING	WP_PHOTODYNAMIC_THERAPYINDUCED_HIF1_SURVIVAL_SIGNALING	WP_PHOTODYNAMIC_THERAPYINDUCED_HIF1_SURVIVAL_SIGNALING	33	-0.584317	-1.7254	0.000790085	0.0168745	0.0137822	1514	tags=39%, list=10%, signal=35%	BCL2L1/PMAIP1/PGK1/BNIP3L/IGFBP2/IGFBP3/VEGFA/SERPINE1/LDHA/SLC2A1/BNIP3/SLC2A3/MCL1	13	39.3939
WP_TH17_CELL_DIFFERENTIATION_PATHWAY	WP_TH17_CELL_DIFFERENTIATION_PATHWAY	WP_TH17_CELL_DIFFERENTIATION_PATHWAY	50	-0.520165	-1.69916	0.000929987	0.0189717	0.0154951	1540	tags=42%, list=10%, signal=38%	STAT6/STAT5A/LCK/NFKBIA/IL6R/PER1/STAT1/CD4/NFATC1/IL27RA/GATA3/IFNGR1/RUNX1/RARA/NR1D1/IL4R/IL23A/JUN/TGFB1/SOCS3/FOS	21	42
KEGG_LEUKOCYTE_TRANSENDOTHELIAL_MIGRATION	KEGG_LEUKOCYTE_TRANSENDOTHELIAL_MIGRATION	KEGG_LEUKOCYTE_TRANSENDOTHELIAL_MIGRATION	89	-0.448015	-1.61063	0.00103989	0.0206245	0.0168451	3415	tags=37%, list=23%, signal=29%	PTK2B/PRKCA/MAPK13/PIK3CA/RAPGEF3/RAC1/CLDN11/MYL12A/MAPK11/F11R/CLDN3/CLDN23/PLCG2/GNAI2/CD99/PRKCG/VCL/ICAM1/CLDN7/CLDN9/PIK3R3/ACTG1/OCLN/BCAR1/PRKCB/RHOH/VASP/CTNNA2/ITK/EZR/ACTN3/THY1/PIK3R1	33	37.0787
WP_ZINC_HOMEOSTASIS	WP_ZINC_HOMEOSTASIS	WP_ZINC_HOMEOSTASIS	26	-0.624098	-1.75292	0.001146	0.0215328	0.0175869	1252	tags=42%, list=8%, signal=39%	SLC39A9/MT1M/SLC30A2/SLC30A3/MT1G/MT1F/MT1H/MT1E/MT2A/MT1X/SLC30A1	11	42.3077
WP_PYRIMIDINE_METABOLISM	WP_PYRIMIDINE_METABOLISM	WP_PYRIMIDINE_METABOLISM	79	0.42406	1.60126	0.00147035	0.0256056	0.0209133	3426	tags=39%, list=23%, signal=30%	POLR1B/TYMS/RRM2/DCTPP1/POLR3E/UCK2/POLD3/POLE2/POLR2G/RRM2B/POLA1/POLR1A/CTPS1/NME1/CMPK1/CAD/RRM1/DUT/ENTPD1/UPRT/POLR2D/UMPS/POLR3G/DCK/PNPT1/NME7/PRIM2/POLA2/POLR3B/UCKL1/POLR3A	31	39.2405
WP_STEROL_REGULATORY_ELEMENTBINDING_PROTEINS_SREBP_SIGNALING	WP_STEROL_REGULATORY_ELEMENTBINDING_PROTEINS_SREBP_SIGNALING	WP_STEROL_REGULATORY_ELEMENTBINDING_PROTEINS_SREBP_SIGNALING	63	0.464236	1.65988	0.00170991	0.0290685	0.0237416	2147	tags=32%, list=14%, signal=27%	SQLE/HMGCS1/YY1/PRKAB2/CREB1/CDK8/SEC23B/SEC24B/HMGCR/IDI1/INSIG1/SCD/MVD/CYP51A1/MBTPS2/PRKAG2/MED15/LDLR/SEC24C/SCAP	20	31.746
WP_DOPAMINERGIC_NEUROGENESIS	WP_DOPAMINERGIC_NEUROGENESIS	WP_DOPAMINERGIC_NEUROGENESIS	14	-0.725358	-1.75087	0.00178917	0.0297085	0.0242643	1753	tags=57%, list=12%, signal=51%	SOX2/SLC18A2/LMX1B/RET/CDKN1C/TGFB1/GBX2/OTX2	8	57.1429
WP_MAMMALIAN_DISORDER_OF_SEXUAL_DEVELOPMENT	WP_MAMMALIAN_DISORDER_OF_SEXUAL_DEVELOPMENT	WP_MAMMALIAN_DISORDER_OF_SEXUAL_DEVELOPMENT	13	-0.753451	-1.80659	0.00194054	0.0300259	0.0245236	2517	tags=54%, list=17%, signal=45%	MAPK11/SOX8/AMH/CBX2/FGF9/FST/FGFR2	7	53.8462
KEGG_HOMOLOGOUS_RECOMBINATION	KEGG_HOMOLOGOUS_RECOMBINATION	KEGG_HOMOLOGOUS_RECOMBINATION	27	0.593368	1.73614	0.0020606	0.0300259	0.0245236	2567	tags=37%, list=17%, signal=31%	RAD54L/BLM/RAD54B/POLD3/RAD52/RAD51C/XRCC2/RPA1/RAD50/TOP3A	10	37.037
WP_CILIARY_LANDSCAPE	WP_CILIARY_LANDSCAPE	WP_CILIARY_LANDSCAPE	205	0.325052	1.41261	0.00204951	0.0300259	0.0245236	3882	tags=36%, list=26%, signal=27%	RB1/CEP97/TBC1D4/TRAF3IP1/XPNPEP3/GID4/ZYG11B/UQCC1/EHBP1/RAB14/MCM4/MKLN1/CEP170/NUP88/NDUFA9/LCA5/MCM6/DCAF7/INTU/RANBP10/VIM/PSMC4/MCM3/NUP133/MSH2/EXOSC2/ACSL3/APC/PAFAH1B1/EXOSC4/NFKB1/WNK1/APMAP/IFT57/IQGAP3/NUDC/GLA/DVL3/MCM10/SMC4/TTC30A/IFT172/EXOSC9/TTC30B/HTRA2/CNOT10/RNGTT/DYNC2I2/EXOC6/PSMC6/COPS4/IFT52/IFT22/CNOT6L/CEP290/IFT20/EIF5B/ARHGDIA/MAPRE2/AIMP1/EFTUD2/CTSA/NEK7/BBS7/MYL6/R…	73	35.6098
WP_COMPLEMENT_SYSTEM	WP_COMPLEMENT_SYSTEM	WP_COMPLEMENT_SYSTEM	43	-0.531328	-1.6521	0.00215961	0.0308393	0.0251879	3974	tags=49%, list=27%, signal=36%	LAMC1/CD19/CR1/CFB/C3/PRKCA/SERPING1/CD40/CD46/PRKACA/GNAI2/ITGA2B/CFP/MASP1/GNA15/ICAM1/PRNP/CD55/LAMB1/THBS1/ADM	21	48.8372
KEGG_DORSO_VENTRAL_AXIS_FORMATION	KEGG_DORSO_VENTRAL_AXIS_FORMATION	KEGG_DORSO_VENTRAL_AXIS_FORMATION	21	0.6165	1.7385	0.00235977	0.0324014	0.0264638	2991	tags=43%, list=20%, signal=34%	ETS2/ETS1/SOS1/KRAS/FMN2/MAPK1/SOS2/NOTCH3/SPIRE2	9	42.8571
KEGG_CIRCADIAN_RHYTHM_MAMMAL	KEGG_CIRCADIAN_RHYTHM_MAMMAL	KEGG_CIRCADIAN_RHYTHM_MAMMAL	12	-0.751728	-1.76383	0.00256595	0.0339276	0.0277103	1895	tags=67%, list=13%, signal=58%	CSNK1E/PER1/PER3/NR1D1/CSNK1D/PER2/BHLHE41/BHLHE40	8	66.6667
KEGG_INTESTINAL_IMMUNE_NETWORK_FOR_IGA_PRODUCTION	KEGG_INTESTINAL_IMMUNE_NETWORK_FOR_IGA_PRODUCTION	KEGG_INTESTINAL_IMMUNE_NETWORK_FOR_IGA_PRODUCTION	22	-0.635301	-1.71428	0.00328929	0.0355841	0.0290632	3822	tags=59%, list=26%, signal=44%	CXCR4/HLA-DMB/HLA-DRA/IL15/CD40/HLA-DPA1/HLA-DQB1/TNFRSF13C/HLA-DOA/MADCAM1/LTBR/TGFB1/MAP3K14	13	59.0909
WP_ENDOCHONDRAL_OSSIFICATION	WP_ENDOCHONDRAL_OSSIFICATION	WP_ENDOCHONDRAL_OSSIFICATION	49	-0.5273	-1.70537	0.00322179	0.0355841	0.0290632	2623	tags=39%, list=18%, signal=32%	ACAN/AKT1/HDAC4/PRKACA/PTH1R/BMPR1A/ADAMTS4/ADAMTS5/STAT1/FGF18/SLC38A2/IGF2/PTCH1/CDKN1C/VEGFA/ADAMTS1/FGFR1/FGFR3/TGFB1	19	38.7755
WP_ENDOCHONDRAL_OSSIFICATION_WITH_SKELETAL_DYSPLASIAS	WP_ENDOCHONDRAL_OSSIFICATION_WITH_SKELETAL_DYSPLASIAS	WP_ENDOCHONDRAL_OSSIFICATION_WITH_SKELETAL_DYSPLASIAS	49	-0.5273	-1.70537	0.00322179	0.0355841	0.0290632	2623	tags=39%, list=18%, signal=32%	ACAN/AKT1/HDAC4/PRKACA/PTH1R/BMPR1A/ADAMTS4/ADAMTS5/STAT1/FGF18/SLC38A2/IGF2/PTCH1/CDKN1C/VEGFA/ADAMTS1/FGFR1/FGFR3/TGFB1	19	38.7755
WP_COHESIN_COMPLEX_CORNELIA_DE_LANGE_SYNDROME	WP_COHESIN_COMPLEX_CORNELIA_DE_LANGE_SYNDROME	WP_COHESIN_COMPLEX_CORNELIA_DE_LANGE_SYNDROME	33	0.531399	1.6656	0.00285702	0.0355841	0.0290632	2593	tags=39%, list=17%, signal=33%	ESPL1/CDK1/ESCO2/PDS5A/WAPL/PDS5B/APC/PPP2R1B/SMC3/PLK1/PPP2R5A/AURKB/SGO1	13	39.3939
WP_OSTEOBLAST_DIFFERENTIATION_AND_RELATED_DISEASES	WP_OSTEOBLAST_DIFFERENTIATION_AND_RELATED_DISEASES	WP_OSTEOBLAST_DIFFERENTIATION_AND_RELATED_DISEASES	93	-0.434235	-1.56758	0.00292234	0.0355841	0.0290632	2589	tags=31%, list=17%, signal=26%	FZD10/NOTCH1/MAPK11/FZD5/JAG2/WNT9B/MAPK10/BMPR1A/PRKCG/PRKCD/BMP2/STAT1/PRKCH/PIK3R3/PRKCB/FGF18/FGF9/HEY2/FZD6/PTCH1/FZD7/FGFR1/FGFR3/JAG1/FGFR2/DLL1/PIK3R1/HES3/WNT3	29	31.1828
WP_CORTICOTROPINRELEASING_HORMONE_SIGNALING_PATHWAY	WP_CORTICOTROPINRELEASING_HORMONE_SIGNALING_PATHWAY	WP_CORTICOTROPINRELEASING_HORMONE_SIGNALING_PATHWAY	73	-0.45107	-1.56296	0.00310601	0.0355841	0.0290632	2492	tags=32%, list=17%, signal=26%	AKT1/JUP/PLCG2/CYP11A1/GNB3/GNAI2/NOS3/ELK1/JUND/NFKBIA/PRKCD/GJA1/PRKCB/CACNA1H/FOSL2/GRK6/TFAP2A/FOSL1/TGFB1/NR4A1/FOSB/JUNB/FOS	23	31.5068
WP_ECTODERM_DIFFERENTIATION	WP_ECTODERM_DIFFERENTIATION	WP_ECTODERM_DIFFERENTIATION	119	-0.40657	-1.5255	0.00325617	0.0355841	0.0290632	2876	tags=34%, list=19%, signal=27%	ASTN1/CLDN11/SCHIP1/CELSR2/FZD5/HDAC10/JUP/CTBP1/TBL1X/NUMA1/ZNF219/PTPRB/HMGB2/SOX2/BMPR1A/ARHGEF9/TFAP2C/BCAS3/MAFB/ZBTB7B/SMURF1/NFATC1/PAN2/UBTF/TLE5/CDH6/SGSM3/CTNNA2/STX16/TFAP2A/ZBTB2/FHL2/FGFR2/PGM1/PIM1/PODXL/SOCS2/BCOR/SPRY2/MYC	40	33.6134
KEGG_OOCYTE_MEIOSIS	KEGG_OOCYTE_MEIOSIS	KEGG_OOCYTE_MEIOSIS	96	0.384018	1.49587	0.00301107	0.0355841	0.0290632	2593	tags=30%, list=17%, signal=25%	AR/CCNE1/FBXO5/ESPL1/ADCY9/PRKACB/RPS6KA3/FBXO43/BTRC/CDK1/CDC27/CDC23/YWHAB/ANAPC7/CDC20/PPP2R1B/ADCY1/CUL1/SMC3/MAPK1/PLK1/CDC26/PPP2R5A/RPS6KA6/ANAPC5/ANAPC1/IGF1R/CDK2/SGO1	29	30.2083
WP_WNT_SIGNALING	WP_WNT_SIGNALING	WP_WNT_SIGNALING	93	-0.430083	-1.55259	0.003501	0.0373092	0.0304722	3135	tags=38%, list=21%, signal=30%	SFRP5/RAC1/PRICKLE2/PORCN/SFRP1/FZD10/ROR1/FZD5/CCND2/CTBP1/PLCB2/CSNK1E/RYK/NKD1/CTNNBIP1/NFATC4/PRKCG/FRAT1/TCF7/NFATC1/NOTUM/PLCB1/PRKCB/SENP2/FZD6/FRAT2/FZD7/JUN/FOSL1/LEF1/SFRP2/CCND1/PRICKLE1/MYC/WNT3	35	37.6344
WP_SEROTONIN_AND_ANXIETY	WP_SEROTONIN_AND_ANXIETY	WP_SEROTONIN_AND_ANXIETY	10	-0.75632	-1.73025	0.00371035	0.0373126	0.030475	1059	tags=40%, list=7%, signal=37%	HTR2C/PRKCB/ARC/FOS	4	40
WP_NOTCH_SIGNALING	WP_NOTCH_SIGNALING	WP_NOTCH_SIGNALING	40	-0.530302	-1.62402	0.00359112	0.0373126	0.030475	3363	tags=38%, list=22%, signal=29%	DTX3/INPP5K/ADAM17/NOTCH1/CTBP1/JAG2/MFNG/PSEN1/APH1B/NUMBL/JAG1/KAT2B/DLL1/LFNG/HES1	15	37.5
WP_LNCRNA_IN_CANONICAL_WNT_SIGNALING_AND_COLORECTAL_CANCER	WP_LNCRNA_IN_CANONICAL_WNT_SIGNALING_AND_COLORECTAL_CANCER	WP_LNCRNA_IN_CANONICAL_WNT_SIGNALING_AND_COLORECTAL_CANCER	77	-0.442952	-1.54554	0.0039826	0.0384267	0.0313849	2589	tags=35%, list=17%, signal=29%	FZD10/ROR1/FZD5/CCND2/CTBP1/CSNK1E/RYK/NKD1/CTNNBIP1/FRAT1/TCF7/NOTUM/SENP2/FZD6/APC2/FRAT2/TFAP2A/FZD7/JUN/FOSL1/LEF1/SFRP2/CCND1/AXIN2/ATF3/MYC/WNT3	27	35.0649
KEGG_CELL_ADHESION_MOLECULES_CAMS	KEGG_CELL_ADHESION_MOLECULES_CAMS	KEGG_CELL_ADHESION_MOLECULES_CAMS	83	-0.434037	-1.53076	0.0042351	0.0403182	0.0329298	2888	tags=42%, list=19%, signal=34%	NRXN1/NRXN2/CLDN11/CD40/CDH3/CADM3/F11R/CLDN3/SDC3/L1CAM/HLA-A/HLA-DPA1/SDC4/CLDN23/NECTIN1/HLA-DQB1/CD99/HLA-E/ALCAM/GLG1/HLA-B/CNTNAP1/NECTIN2/HLA-DOA/ICAM1/CLDN7/CLDN9/CD4/CNTN1/OCLN/MADCAM1/CDH1/PDCD1/NLGN2/ITGB8	35	42.1687
WP_ATM_SIGNALING_PATHWAY	WP_ATM_SIGNALING_PATHWAY	WP_ATM_SIGNALING_PATHWAY	40	0.471097	1.54122	0.0045278	0.0425375	0.0347424	2582	tags=35%, list=17%, signal=29%	ATF2/CDKN1A/CCNE1/CREB1/BRCA1/CDK1/AP3B2/PIDD1/TP53/TP53BP1/RAD50/ABL1/CDK2/MAPK9	14	35
WP_HYPERTROPHY_MODEL	WP_HYPERTROPHY_MODEL	WP_HYPERTROPHY_MODEL	15	-0.69486	-1.71921	0.00488705	0.0447353	0.0365375	1688	tags=60%, list=11%, signal=53%	DUSP14/JUND/WDR1/NR4A3/IFRD1/HBEGF/VEGFA/ATF3/CCN1	9	60
WP_MAMMARY_GLAND_DEVELOPMENT_PATHWAY_EMBRYONIC_DEVELOPMENT_STAGE_1_OF_4	WP_MAMMARY_GLAND_DEVELOPMENT_PATHWAY_EMBRYONIC_DEVELOPMENT_STAGE_1_OF_4	WP_MAMMARY_GLAND_DEVELOPMENT_PATHWAY_EMBRYONIC_DEVELOPMENT_STAGE_1_OF_4	13	-0.726825	-1.74275	0.00498551	0.0450589	0.0368018	709	tags=46%, list=5%, signal=44%	SFRP1/AKT1/CDH1/TGFB1/CCND1/MYC	6	46.1538
WP_TRANSCRIPTIONAL_CASCADE_REGULATING_ADIPOGENESIS	WP_TRANSCRIPTIONAL_CASCADE_REGULATING_ADIPOGENESIS	WP_TRANSCRIPTIONAL_CASCADE_REGULATING_ADIPOGENESIS	11	-0.736466	-1.70165	0.00566865	0.0459934	0.037565	2635	tags=64%, list=18%, signal=52%	KLF5/CEBPG/CEBPB/GATA3/EGR2/DDIT3/GATA2	7	63.6364
WP_CANONICAL_AND_NONCANONICAL_NOTCH_SIGNALING	WP_CANONICAL_AND_NONCANONICAL_NOTCH_SIGNALING	WP_CANONICAL_AND_NONCANONICAL_NOTCH_SIGNALING	24	-0.607555	-1.67061	0.00557483	0.0459934	0.037565	2520	tags=33%, list=17%, signal=28%	NOTCH1/JAG2/PSEN1/RRAS/JAG1/LEF1/DLL1/HES1	8	33.3333
KEGG_ARRHYTHMOGENIC_RIGHT_VENTRICULAR_CARDIOMYOPATHY_ARVC	KEGG_ARRHYTHMOGENIC_RIGHT_VENTRICULAR_CARDIOMYOPATHY_ARVC	KEGG_ARRHYTHMOGENIC_RIGHT_VENTRICULAR_CARDIOMYOPATHY_ARVC	61	-0.469554	-1.57704	0.0053722	0.0459934	0.037565	1730	tags=31%, list=12%, signal=28%	ITGA2B/LAMA2/CACNG6/TCF7/GJA1/EMD/ACTG1/CTNNA2/CACNA1F/CACNB1/ITGA5/DSP/CACNG8/CACNG7/ACTN3/LEF1/DES/ITGB8/CACNA2D2	19	31.1475
WP_ARRHYTHMOGENIC_RIGHT_VENTRICULAR_CARDIOMYOPATHY	WP_ARRHYTHMOGENIC_RIGHT_VENTRICULAR_CARDIOMYOPATHY	WP_ARRHYTHMOGENIC_RIGHT_VENTRICULAR_CARDIOMYOPATHY	61	-0.469554	-1.57704	0.0053722	0.0459934	0.037565	1730	tags=31%, list=12%, signal=28%	ITGA2B/LAMA2/CACNG6/TCF7/GJA1/EMD/ACTG1/CTNNA2/CACNA1F/CACNB1/ITGA5/DSP/CACNG8/CACNG7/ACTN3/LEF1/DES/ITGB8/CACNA2D2	19	31.1475
WP_PATHWAYS_AFFECTED_IN_ADENOID_CYSTIC_CARCINOMA	WP_PATHWAYS_AFFECTED_IN_ADENOID_CYSTIC_CARCINOMA	WP_PATHWAYS_AFFECTED_IN_ADENOID_CYSTIC_CARCINOMA	62	-0.466089	-1.57159	0.00563578	0.0459934	0.037565	2520	tags=31%, list=17%, signal=26%	NOTCH1/AKT1/FGF16/CTBP1/ERBIN/MAGI2/MORF4L1/CHEK1/KDM6A/MYCN/ERBB2/BRD1/ARID4B/KDM6B/FOXO3/JMJD1C/IL17RD/BCOR/MYC	19	30.6452
WP_TGFBETA_RECEPTOR_SIGNALING_IN_SKELETAL_DYSPLASIAS	WP_TGFBETA_RECEPTOR_SIGNALING_IN_SKELETAL_DYSPLASIAS	WP_TGFBETA_RECEPTOR_SIGNALING_IN_SKELETAL_DYSPLASIAS	50	-0.48092	-1.57097	0.0055316	0.0459934	0.037565	2192	tags=32%, list=15%, signal=27%	SMAD3/LTBP3/BAMBI/TFE3/STAT1/INHBA/TGIF1/FST/SERPINE1/JUN/TGFB1/LEF1/TGFBR2/THBS1/SMAD7/FOS	16	32
WP_GPCRS_CLASS_A_RHODOPSINLIKE	WP_GPCRS_CLASS_A_RHODOPSINLIKE	WP_GPCRS_CLASS_A_RHODOPSINLIKE	66	-0.457075	-1.56067	0.00558745	0.0459934	0.037565	3013	tags=35%, list=20%, signal=28%	CXCR2/ADORA2B/ADRA2C/GRPR/SSTR3/ADRA2A/HTR6/SSTR2/F2RL1/HRH1/LTB4R/GPR3/LPAR6/HTR2C/HTR1D/CMKLR1/OR2H2/CHRM4/P2RY1/HTR7/P2RY11/GPR50/EDNRB	23	34.8485
WP_WNT_SIGNALING_PATHWAY_AND_PLURIPOTENCY	WP_WNT_SIGNALING_PATHWAY_AND_PLURIPOTENCY	WP_WNT_SIGNALING_PATHWAY_AND_PLURIPOTENCY	87	-0.4252	-1.51549	0.00550055	0.0459934	0.037565	2589	tags=31%, list=17%, signal=26%	FZD10/PPM1J/FZD5/CCND2/CTBP1/WNT9B/CSNK1E/NKD1/SOX2/MAPK10/PRKCG/FRAT1/PRKCD/PRKCH/TCF7/PRKCB/FZD6/NANOG/FOXD3/FZD7/JUN/FOSL1/LEF1/CCND1/AXIN2/MYC/WNT3	27	31.0345
WP_FLUOROPYRIMIDINE_ACTIVITY	WP_FLUOROPYRIMIDINE_ACTIVITY	WP_FLUOROPYRIMIDINE_ACTIVITY	26	0.549779	1.5998	0.00662597	0.0519884	0.0424614	2902	tags=42%, list=19%, signal=34%	ABCC5/TYMS/RRM2/PPAT/UCK2/RRM1/DHFR/UMPS/TP53/ABCC4/SMUG1	11	42.3077
WP_HIPPO_SIGNALING_REGULATION_PATHWAYS	WP_HIPPO_SIGNALING_REGULATION_PATHWAYS	WP_HIPPO_SIGNALING_REGULATION_PATHWAYS	82	-0.429347	-1.51096	0.00719787	0.055261	0.0451343	2536	tags=34%, list=17%, signal=29%	CDH3/PRKAA1/PLCB2/FLT4/SMAD3/NGFR/PRKACA/GNAI2/PRKAB1/MST1/PRKCG/TEAD1/PRKCD/TEAD4/PRKCH/TCF7/PLCB1/PRKCB/CDH6/CDH1/EPHA2/KDR/FGFR1/FGFR3/FGFR2/LEF1/PDGFRA/LATS2	28	34.1463
KEGG_WNT_SIGNALING_PATHWAY	KEGG_WNT_SIGNALING_PATHWAY	KEGG_WNT_SIGNALING_PATHWAY	126	-0.384031	-1.45356	0.00746609	0.0557946	0.0455701	3146	tags=37%, list=21%, signal=29%	FBXW11/SFRP5/RAC1/PRICKLE2/PORCN/SFRP1/PPP2CA/CHP1/TBL1XR1/FZD10/FZD5/CCND2/CTBP1/PLCB2/TBL1X/SMAD3/WNT9B/PRKACA/SIAH1/CSNK1E/PSEN1/NKD1/MAPK10/CTNNBIP1/NFATC4/PRKCG/FRAT1/CHP2/TCF7/NFATC1/PLCB1/PRKCB/SENP2/FZD6/APC2/FRAT2/FZD7/JUN/FOSL1/LEF1/SFRP2/CCND1/AXIN2/PRICKLE1/MYC/WNT3	46	36.5079
WP_MAMMARY_GLAND_DEVELOPMENT_PATHWAY_PUBERTY_STAGE_2_OF_4	WP_MAMMARY_GLAND_DEVELOPMENT_PATHWAY_PUBERTY_STAGE_2_OF_4	WP_MAMMARY_GLAND_DEVELOPMENT_PATHWAY_PUBERTY_STAGE_2_OF_4	10	-0.732895	-1.67666	0.00759418	0.0558994	0.0456557	661	tags=50%, list=4%, signal=48%	STAT5A/ERBB2/FOSL1/CCND1/MYC	5	50
WP_TYROBP_CAUSAL_NETWORK_IN_MICROGLIA	WP_TYROBP_CAUSAL_NETWORK_IN_MICROGLIA	WP_TYROBP_CAUSAL_NETWORK_IN_MICROGLIA	38	-0.516899	-1.57185	0.00806916	0.0581957	0.0475312	1085	tags=42%, list=7%, signal=39%	LOXL3/CD37/TGFBR1/C3/CAPG/SLC1A5/STAT5A/NRROS/KCNE3/CD4/HCLS1/PPP1R18/MAF/RBM47/ZFP36L2/SH2B3	16	42.1053
WP_EGFR_TYROSINE_KINASE_INHIBITOR_RESISTANCE	WP_EGFR_TYROSINE_KINASE_INHIBITOR_RESISTANCE	WP_EGFR_TYROSINE_KINASE_INHIBITOR_RESISTANCE	80	-0.417116	-1.46335	0.00804241	0.0581957	0.0475312	2511	tags=30%, list=17%, signal=25%	SHC1/AKT1/PLCG2/MRAS/NRAS/RRAS/PRKCG/BCL2L1/IL6R/SHC2/PIK3R3/PRKCB/ERBB2/VEGFA/FOXO3/KDR/FGFR3/PDGFB/FGFR2/PDGFRA/CCND1/PDGFA/PIK3R1/MYC	24	30
WP_EPITHELIAL_TO_MESENCHYMAL_TRANSITION_IN_COLORECTAL_CANCER	WP_EPITHELIAL_TO_MESENCHYMAL_TRANSITION_IN_COLORECTAL_CANCER	WP_EPITHELIAL_TO_MESENCHYMAL_TRANSITION_IN_COLORECTAL_CANCER	126	-0.380521	-1.44027	0.00881333	0.0616933	0.0503879	2603	tags=30%, list=17%, signal=25%	PKD1/FZD10/CTDSP1/NOTCH1/MAPK11/SHC1/FZD5/AKT1/JUP/CLDN3/JAG2/CLDN23/SMAD3/WNT9B/TRAF6/CLDN7/MEF2D/CLDN9/PIK3R3/OCLN/CDH1/ITGA5/DSP/FZD6/PROX1/COL4A6/ID1/FZD7/GDF15/JAG1/TGFB1/TGFBR2/ID2/DLL1/PIK3R1/LATS2/SNAI1/WNT3	38	30.1587
WP_QUERCETIN_AND_NFKB_AP1_INDUCED_APOPTOSIS	WP_QUERCETIN_AND_NFKB_AP1_INDUCED_APOPTOSIS	WP_QUERCETIN_AND_NFKB_AP1_INDUCED_APOPTOSIS	12	-0.710496	-1.66708	0.00897411	0.0622089	0.0508089	1540	tags=58%, list=10%, signal=52%	MAFK/NFKBIA/MAFG/NFE2L2/VEGFA/JUN/FOS	7	58.3333
WP_BURN_WOUND_HEALING	WP_BURN_WOUND_HEALING	WP_BURN_WOUND_HEALING	72	-0.436874	-1.51429	0.00948118	0.065092	0.0531637	3581	tags=36%, list=24%, signal=28%	TIMP1/LGALS1/NOD1/IL15/TPT1/XIST/CXCR2/CNN2/MIAT/AKT1/ACHE/SMAD3/NFKBIA/MYD88/ICAM1/LIN28A/INHBA/FST/CD248/VEGFA/TNFAIP3/KDR/FGFR1/FGFR3/FGFR2/SFRP2	26	36.1111
WP_WNTBETACATENIN_SIGNALING_PATHWAY_IN_LEUKEMIA	WP_WNTBETACATENIN_SIGNALING_PATHWAY_IN_LEUKEMIA	WP_WNTBETACATENIN_SIGNALING_PATHWAY_IN_LEUKEMIA	23	-0.577272	-1.5729	0.00961522	0.0653835	0.0534018	1234	tags=39%, list=8%, signal=36%	AKT1/JUP/PYGO1/RARA/FZD6/LEF1/CCND1/AXIN2/MYC	9	39.1304
KEGG_NOTCH_SIGNALING_PATHWAY	KEGG_NOTCH_SIGNALING_PATHWAY	KEGG_NOTCH_SIGNALING_PATHWAY	43	-0.487952	-1.51722	0.00997921	0.0672185	0.0549005	3363	tags=33%, list=22%, signal=25%	DTX3/ADAM17/CIR1/NOTCH1/CTBP1/JAG2/MFNG/PSEN1/NUMBL/JAG1/KAT2B/DLL1/LFNG/HES1	14	32.5581
WP_ARSENIC_METABOLISM_AND_REACTIVE_OXYGEN_SPECIES_GENERATION	WP_ARSENIC_METABOLISM_AND_REACTIVE_OXYGEN_SPECIES_GENERATION	WP_ARSENIC_METABOLISM_AND_REACTIVE_OXYGEN_SPECIES_GENERATION	10	0.696587	1.59895	0.0112955	0.0739905	0.0604316	2478	tags=50%, list=17%, signal=42%	CAT/COA3/ATP1A1/SDHA/VDAC1	5	50
KEGG_ALLOGRAFT_REJECTION	KEGG_ALLOGRAFT_REJECTION	KEGG_ALLOGRAFT_REJECTION	16	-0.631182	-1.60223	0.0117912	0.0759681	0.0620468	3735	tags=62%, list=25%, signal=47%	HLA-DMB/HLA-DRA/HLA-G/CD40/HLA-A/HLA-DPA1/HLA-DQB1/HLA-E/HLA-B/HLA-DOA	10	62.5
WP_IL2_SIGNALING_PATHWAY	WP_IL2_SIGNALING_PATHWAY	WP_IL2_SIGNALING_PATHWAY	39	-0.501672	-1.52424	0.0118102	0.0759681	0.0620468	2903	tags=41%, list=19%, signal=33%	RPS6/STAT3/SHC1/AKT1/CCND2/STAT5A/LCK/IL2RB/STAT1/JAK3/FOXO3/JUN/SOCS3/PIK3R1/MYC/FOS	16	41.0256
KEGG_BIOSYNTHESIS_OF_UNSATURATED_FATTY_ACIDS	KEGG_BIOSYNTHESIS_OF_UNSATURATED_FATTY_ACIDS	KEGG_BIOSYNTHESIS_OF_UNSATURATED_FATTY_ACIDS	20	0.56867	1.57995	0.0128309	0.0810731	0.0662163	3034	tags=35%, list=20%, signal=28%	FADS2/ELOVL2/SCD/YOD1/ELOVL6/ACOT7/HACD2	7	35
KEGG_TERPENOID_BACKBONE_BIOSYNTHESIS	KEGG_TERPENOID_BACKBONE_BIOSYNTHESIS	KEGG_TERPENOID_BACKBONE_BIOSYNTHESIS	13	0.667684	1.65696	0.0133038	0.0833184	0.0680501	1221	tags=46%, list=8%, signal=42%	HMGCS1/MVK/HMGCR/PDSS1/IDI1/MVD	6	46.1538
WP_UNFOLDED_PROTEIN_RESPONSE	WP_UNFOLDED_PROTEIN_RESPONSE	WP_UNFOLDED_PROTEIN_RESPONSE	22	-0.587228	-1.58457	0.0134196	0.0833184	0.0680501	2304	tags=41%, list=15%, signal=35%	XBP1/BBC3/TNFRSF10B/PMAIP1/NFE2L2/ATF4/PPP1R15A/DDIT3/TXNIP	9	40.9091
WP_AEROBIC_GLYCOLYSIS	WP_AEROBIC_GLYCOLYSIS	WP_AEROBIC_GLYCOLYSIS	12	-0.695097	-1.63095	0.0138437	0.0844821	0.0690005	3792	tags=67%, list=25%, signal=50%	ALDOA/PGAM2/PKM/PFKM/TPI1/PGK1/LDHA/SLC2A1	8	66.6667
WP_NOTCH_SIGNALING_PATHWAY	WP_NOTCH_SIGNALING_PATHWAY	WP_NOTCH_SIGNALING_PATHWAY	57	-0.440291	-1.46536	0.0147687	0.0886122	0.0723738	2520	tags=32%, list=17%, signal=26%	STAT3/NOTCH1/AKT1/JAG2/TLE1/LCK/RING1/PSEN1/GATA3/APH1B/NUMBL/HEY2/JAG1/DLL1/CCND1/PIK3R1/MYC/HES1	18	31.5789
KEGG_HYPERTROPHIC_CARDIOMYOPATHY_HCM	KEGG_HYPERTROPHIC_CARDIOMYOPATHY_HCM	KEGG_HYPERTROPHIC_CARDIOMYOPATHY_HCM	61	-0.439358	-1.47562	0.0149123	0.0887283	0.0724686	2503	tags=34%, list=17%, signal=29%	CACNA1C/PRKAA1/ACE/CACNB3/PRKAB1/ITGA2B/LAMA2/CACNG6/TNNI3/TPM4/EMD/ACTG1/CACNA1F/CACNB1/ITGA5/CACNG8/CACNG7/TGFB1/DES/ITGB8/CACNA2D2	21	34.4262
WP_PYRIMIDINE_METABOLISM_AND_RELATED_DISEASES	WP_PYRIMIDINE_METABOLISM_AND_RELATED_DISEASES	WP_PYRIMIDINE_METABOLISM_AND_RELATED_DISEASES	13	0.66482	1.64985	0.0152626	0.0897824	0.0733296	1978	tags=46%, list=13%, signal=40%	TYMS/RRM2/RRM2B/CAD/RRM1/UMPS	6	46.1538
WP_MONOAMINE_GPCRS	WP_MONOAMINE_GPCRS	WP_MONOAMINE_GPCRS	14	-0.650628	-1.57048	0.015341	0.0897824	0.0733296	2932	tags=57%, list=20%, signal=46%	ADRA2C/ADRA2A/HTR6/HRH1/HTR2C/HTR1D/CHRM4/HTR7	8	57.1429
WP_MODULATORS_OF_TCR_SIGNALING_AND_T_CELL_ACTIVATION	WP_MODULATORS_OF_TCR_SIGNALING_AND_T_CELL_ACTIVATION	WP_MODULATORS_OF_TCR_SIGNALING_AND_T_CELL_ACTIVATION	49	-0.481589	-1.55754	0.0156906	0.090563	0.0739671	3018	tags=39%, list=20%, signal=31%	MAP4K1/SMARCB1/TMEM222/RNF7/AKT1/CUL5/RASA2/TRAF6/LCK/NFKBIA/MEF2D/BCL10/RHOH/ITK/TNFAIP3/MAP3K14/PIK3R1/ZFP36L1/SH2B3	19	38.7755
WP_HEMATOPOIETIC_STEM_CELL_DIFFERENTIATION	WP_HEMATOPOIETIC_STEM_CELL_DIFFERENTIATION	WP_HEMATOPOIETIC_STEM_CELL_DIFFERENTIATION	34	-0.498612	-1.486	0.015728	0.090563	0.0739671	2520	tags=41%, list=17%, signal=34%	ACVR1B/TNXB/NOTCH1/RIOK3/MUC1/STAT5A/ITGA2B/RUNX1/RHOH/LEF1/PIM1/FOSB/GATA2/FOS	14	41.1765
WP_SPLICING_FACTOR_NOVA_REGULATED_SYNAPTIC_PROTEINS	WP_SPLICING_FACTOR_NOVA_REGULATED_SYNAPTIC_PROTEINS	WP_SPLICING_FACTOR_NOVA_REGULATED_SYNAPTIC_PROTEINS	39	0.445306	1.46308	0.0171434	0.0956279	0.0781038	3655	tags=38%, list=24%, signal=29%	CDH2/CAV2/STX2/GPHN/NEO1/ATP2B1/NCDN/MAP4/KCNMA1/MAPK9/GABBR2/ANK3/EPB41L2/GRIN2B/SNW1	15	38.4615
KEGG_TYPE_II_DIABETES_MELLITUS	KEGG_TYPE_II_DIABETES_MELLITUS	KEGG_TYPE_II_DIABETES_MELLITUS	40	-0.481925	-1.47587	0.0175341	0.0970494	0.0792648	2513	tags=32%, list=17%, signal=27%	CACNA1G/CACNA1C/IRS2/MAFA/IRS4/MAPK10/PRKCD/PIK3R3/HK2/SOCS4/SOCS3/SOCS2/PIK3R1	13	32.5
KEGG_GLYCOSPHINGOLIPID_BIOSYNTHESIS_LACTO_AND_NEOLACTO_SERIES	KEGG_GLYCOSPHINGOLIPID_BIOSYNTHESIS_LACTO_AND_NEOLACTO_SERIES	KEGG_GLYCOSPHINGOLIPID_BIOSYNTHESIS_LACTO_AND_NEOLACTO_SERIES	20	-0.576644	-1.51333	0.0179052	0.0983408	0.0803196	1739	tags=35%, list=12%, signal=31%	B4GALT2/FUT4/B4GALT4/FUT1/B3GALT5/B3GNT2/GCNT2	7	35
WP_DNA_REPLICATION	WP_DNA_REPLICATION	WP_DNA_REPLICATION	41	0.452652	1.49107	0.0182494	0.0994662	0.0812388	3041	tags=39%, list=20%, signal=31%	RFC5/MCM4/POLD3/MCM6/POLE2/POLA1/MCM3/DBF4/ORC2/CDC7/MCM10/RPA1/CDK2/RFC1/PRIM2/POLA2	16	39.0244
WP_COMPLEMENT_AND_COAGULATION_CASCADES	WP_COMPLEMENT_AND_COAGULATION_CASCADES	WP_COMPLEMENT_AND_COAGULATION_CASCADES	26	-0.527025	-1.48027	0.018443	0.0997599	0.0814787	3926	tags=50%, list=26%, signal=37%	PLAU/CR1/CFB/CLU/C3/SERPING1/LMAN1/CD46/C1R/MASP1/CD55/SERPINE1/F3	13	50
WP_IL5_SIGNALING_PATHWAY	WP_IL5_SIGNALING_PATHWAY	WP_IL5_SIGNALING_PATHWAY	36	-0.489897	-1.47354	0.0223009	0.117947	0.096333	2903	tags=39%, list=19%, signal=31%	RPS6/STAT3/SHC1/AKT1/STAT5A/ELK1/STAT1/LYN/FOXO3/JUN/SPRED1/PIK3R1/MYC/FOS	14	38.8889
WP_PREGNANE_X_RECEPTOR_PATHWAY	WP_PREGNANE_X_RECEPTOR_PATHWAY	WP_PREGNANE_X_RECEPTOR_PATHWAY	18	0.583251	1.5945	0.0230549	0.121038	0.0988575	3326	tags=50%, list=22%, signal=39%	RXRA/NCOA2/NCOA3/CYP2B6/HSP90AA1/FOXO1/ABCC4/PSMC5/ABCC2	9	50
WP_NCRNAS_INVOLVED_IN_WNT_SIGNALING_IN_HEPATOCELLULAR_CARCINOMA	WP_NCRNAS_INVOLVED_IN_WNT_SIGNALING_IN_HEPATOCELLULAR_CARCINOMA	WP_NCRNAS_INVOLVED_IN_WNT_SIGNALING_IN_HEPATOCELLULAR_CARCINOMA	67	-0.423038	-1.45006	0.0253341	0.131077	0.107057	2589	tags=34%, list=17%, signal=29%	FZD10/ROR1/FZD5/CCND2/CTBP1/CSNK1E/RYK/NKD1/CTNNBIP1/FRAT1/TCF7/NOTUM/SENP2/FZD6/FRAT2/FZD7/JUN/FOSL1/LEF1/SFRP2/CCND1/MYC/WNT3	23	34.3284
WP_HOMOLOGOUS_RECOMBINATION	WP_HOMOLOGOUS_RECOMBINATION	WP_HOMOLOGOUS_RECOMBINATION	13	0.639753	1.58764	0.0260829	0.13398	0.109428	2399	tags=38%, list=16%, signal=32%	RAD54B/POLD3/RAD52/RPA1/RAD50	5	38.4615
WP_SMC1SMC3_ROLE_IN_DNA_DAMAGE_CORNELIA_DE_LANGE_SYNDROME	WP_SMC1SMC3_ROLE_IN_DNA_DAMAGE_CORNELIA_DE_LANGE_SYNDROME	WP_SMC1SMC3_ROLE_IN_DNA_DAMAGE_CORNELIA_DE_LANGE_SYNDROME	11	0.679153	1.59813	0.0266579	0.135955	0.111041	3893	tags=64%, list=26%, signal=47%	BRCA1/PAXIP1/SMC3/RAD50/MRE11/SMC1A/RAD18	7	63.6364
KEGG_PROGESTERONE_MEDIATED_OOCYTE_MATURATION	KEGG_PROGESTERONE_MEDIATED_OOCYTE_MATURATION	KEGG_PROGESTERONE_MEDIATED_OOCYTE_MATURATION	77	0.349112	1.30917	0.0297166	0.147345	0.120343	2736	tags=35%, list=18%, signal=29%	ADCY9/PRKACB/RPS6KA3/CDK1/MAPK14/CDC27/AKT3/KRAS/CDC23/ANAPC7/PDE3B/ADCY1/GNAI1/MAPK1/PLK1/PDE3A/CDC26/RPS6KA6/ANAPC5/HSP90AA1/ANAPC1/IGF1R/CDK2/CCNA2/MAPK9/PIK3CB/FZR1	27	35.0649
KEGG_CELL_CYCLE	KEGG_CELL_CYCLE	KEGG_CELL_CYCLE	117	0.314085	1.25292	0.029516	0.147345	0.120343	2621	tags=31%, list=17%, signal=26%	RB1/STAG1/CDKN1A/CCNE1/SKP2/ESPL1/MCM4/CDK1/TFDP1/CDC27/MCM6/BUB1B/E2F1/TFDP2/ZBTB17/CDC23/YWHAB/E2F5/MCM3/ANAPC7/CDC20/DBF4/ORC2/CDC7/CUL1/SMC3/PLK1/TP53/CDC26/RBL2/ANAPC5/ANAPC1/ABL1/CDK2/CCNA2/GSK3B	36	30.7692
WP_EUKARYOTIC_TRANSCRIPTION_INITIATION	WP_EUKARYOTIC_TRANSCRIPTION_INITIATION	WP_EUKARYOTIC_TRANSCRIPTION_INITIATION	42	0.422664	1.40016	0.0313342	0.154294	0.126019	4147	tags=38%, list=28%, signal=28%	POLR1B/TAF5/POLR3E/GTF2H2C/POLR2G/POLR1A/TAF12/GTF2E2/GTF2H1/ILK/POLR3B/GTF2H4/POLR2I/POLR2H/ERCC3/POLR2B	16	38.0952
WP_IL7_SIGNALING_PATHWAY	WP_IL7_SIGNALING_PATHWAY	WP_IL7_SIGNALING_PATHWAY	21	-0.562211	-1.49307	0.0334406	0.163538	0.13357	2749	tags=67%, list=18%, signal=55%	MAPK3/MAP2K2/STAT5B/CDKN1B/PTK2B/STAT3/AKT1/STAT5A/BCL2L1/STAT1/JAK3/CCND1/PIK3R1/MYC	14	66.6667
WP_OXIDATIVE_STRESS_RESPONSE	WP_OXIDATIVE_STRESS_RESPONSE	WP_OXIDATIVE_STRESS_RESPONSE	27	-0.521884	-1.48301	0.0351493	0.170725	0.139439	1723	tags=33%, list=12%, signal=30%	MAPK10/TXNRD2/CYP1A1/MAOA/HMOX1/NFE2L2/MT1X/JUNB/FOS	9	33.3333
WP_METABOLISM_OF_SPINGOLIPIDS_IN_ER_AND_GOLGI_APPARATUS	WP_METABOLISM_OF_SPINGOLIPIDS_IN_ER_AND_GOLGI_APPARATUS	WP_METABOLISM_OF_SPINGOLIPIDS_IN_ER_AND_GOLGI_APPARATUS	19	-0.565075	-1.47132	0.0362443	0.173681	0.141853	2674	tags=42%, list=18%, signal=35%	B4GALNT1/B4GALT2/ST6GALNAC3/SGPP1/KDSR/SPHK1/UGT8/SGMS2	8	42.1053
KEGG_COMPLEMENT_AND_COAGULATION_CASCADES	KEGG_COMPLEMENT_AND_COAGULATION_CASCADES	KEGG_COMPLEMENT_AND_COAGULATION_CASCADES	27	-0.5203	-1.47851	0.0366886	0.174638	0.142635	3926	tags=44%, list=26%, signal=33%	PLAU/CR1/CFB/C3/SERPING1/CD46/C1R/A2M/MASP1/CD55/SERPINE1/F3	12	44.4444
WP_CORI_CYCLE	WP_CORI_CYCLE	WP_CORI_CYCLE	13	-0.64142	-1.53797	0.0404779	0.190139	0.155296	2273	tags=38%, list=15%, signal=33%	TALDO1/TPI1/PGK1/LDHA/SLC2A1	5	38.4615
WP_CYTOKINES_AND_INFLAMMATORY_RESPONSE	WP_CYTOKINES_AND_INFLAMMATORY_RESPONSE	WP_CYTOKINES_AND_INFLAMMATORY_RESPONSE	10	-0.656614	-1.50215	0.0459559	0.211694	0.1729	1084	tags=60%, list=7%, signal=56%	HLA-DRA/IL15/CD4/IL11/TGFB1/PDGFA	6	60
WP_ANGIOPOIETINLIKE_PROTEIN_8_REGULATORY_PATHWAY	WP_ANGIOPOIETINLIKE_PROTEIN_8_REGULATORY_PATHWAY	WP_ANGIOPOIETINLIKE_PROTEIN_8_REGULATORY_PATHWAY	118	0.314758	1.26435	0.047501	0.213307	0.174218	3098	tags=35%, list=21%, signal=28%	PIK3R4/SOS1/PRKAB2/MAP4K4/CBLB/RPS6KA3/IRS1/MAP3K4/PIK3C2A/RXRA/TSC1/MAPK14/HRAS/THRB/SCD/PTPN1/MAP3K7/RPS6KB1/PIK3C3/TRIP10/MAP4K3/RAPGEF1/CYP2B6/MAPK1/MAP3K3/PRKAG2/RPS6KA6/SOS2/SHC3/MAP2K6/MAPK9/FOXO1/GSK3B/PIK3CB/SESN3/MAP3K2/SREBF1/CRK/RICTOR/EIF4E/EIF4EBP1	41	34.7458
