# Supplementary material for: SALL3 mediates the loss of neuroectodermal differentiation potential in human embryonic stem cells with chromosome 18q loss
Source: Research Square preprint supplement (doi:10.21203/rs.3.rs-3100381/v1), 2023-07-28
Supplement: Supplementary file 3 [file ed9761318cb85c5e4d1264e5.xlsx]

## Sheet: Table3.common_GSEA_C2_H-library
Description	setSize	enrichmentScore	NES	pvalue	p.adjust	qvalue	rank	leading_edge	core_enrichment	size_edge	percent	Samples
HALLMARK_TNFA_SIGNALING_VIA_NFKB	166	-0.632376	-2.46255	1e-10	2.5e-09	1.10526e-09	1847	tags=46%, list=12%, signal=41%	GFPT2/SLC16A6/FUT4/SQSTM1/F2RL1/CEBPB/NFKBIA/MARCKS/TNFSF9/PER1/BMP2/CD83/ICAM1/ZBTB10/SPHK1/CXCL3/CLCF1/LITAF/NR4A3/INHBA/KLF9/TGIF1/HBEGF/FOSL2/MXD1/PNRC1/SERPINB8/IFNGR2/YRDC/PFKFB3/NFE2L2/EFNA1/KDM6B/EIF1/VEGFA/TNFAIP3/DUSP1/KLF6/IER3/IL23A/SERPINE1/TRIB1/EGR2/DUSP2/JUN/JAG1/FOSL1/NR4A1/ZFP36/ID2/CCND1/SOCS3/PPP1R15A/DUSP4/SLC2A3/DUSP5/FOSB/RHOB/PHLDA2/IER2/GADD45B/MCL1/TIPARP/ATF3/PDE4B/F3/C…	77	46.3855	VUB13del18q -SALL3OE
WP_HAIR_FOLLICLE_DEVELOPMENT_ORGANOGENESIS_PART_2_OF_3	27	-0.721631	-2.05062	2.29e-05	0.00125789	0.00102738	1189	tags=41%, list=8%, signal=38%	GTPBP4/INHBA/CDH1/PTCH1/FGFR2/LEF1/PDGFRA/CCND1/PDGFA/SNAI1/MYC	11	40.7407	VUB13del18q -SALL3OE
HALLMARK_TGF_BETA_SIGNALING	53	-0.587143	-1.93799	5.15394e-05	0.000429495	0.000189882	726	tags=36%, list=5%, signal=34%	BMP2/SMURF1/TGIF1/CDH1/ARID4B/IFNGR2/CDKN1C/ID1/SERPINE1/FNTA/TGFB1/ID2/WWTR1/PPP1R15A/THBS1/SMAD7/ID3/JUNB/KLF10	19	35.8491	VUB13del18q -SALL3OE
WP_CARDIAC_PROGENITOR_DIFFERENTIATION	34	-0.628062	-1.87179	0.000215317	0.0074888	0.00611646	2520	tags=50%, list=17%, signal=42%	NOTCH1/SCN5A/ANPEP/IRX4/SOX2/SIRPA/SOX1/TNNI3/LIN28A/INHBA/LIN28B/NANOG/IGF2/KDR/THY1/TGFB1/PDGFRA	17	50	VUB13del18q -SALL3OE
HALLMARK_IL6_JAK_STAT3_SIGNALING	58	-0.535928	-1.80204	0.000261592	0.00163495	0.000722821	2749	tags=40%, list=18%, signal=33%	STAT3/HAX1/IL1R1/CD9/STAT2/A2M/CD38/LEPR/MYD88/STAT1/CXCL3/IFNGR1/LTBR/HMOX1/IFNGR2/PLA2G2A/INHBE/IL4R/JUN/TGFB1/PIM1/SOCS3/TNFRSF12A	23	39.6552	VUB13del18q -SALL3OE
KEGG_CIRCADIAN_RHYTHM_MAMMAL	12	-0.751728	-1.76383	0.00256595	0.0339276	0.0277103	1895	tags=67%, list=13%, signal=58%	CSNK1E/PER1/PER3/NR1D1/CSNK1D/PER2/BHLHE41/BHLHE40	8	66.6667	VUB13del18q -SALL3OE
WP_ZINC_HOMEOSTASIS	26	-0.624098	-1.75292	0.00114601	0.0215328	0.0175869	1252	tags=42%, list=8%, signal=39%	SLC39A9/MT1M/SLC30A2/SLC30A3/MT1G/MT1F/MT1H/MT1E/MT2A/MT1X/SLC30A1	11	42.3077	VUB13del18q -SALL3OE
KEGG_JAK_STAT_SIGNALING_PATHWAY	88	-0.47937	-1.71465	0.000220259	0.0074888	0.00611646	2531	tags=36%, list=17%, signal=30%	SOCS5/SPRY1/AKT1/CCND2/STAT6/STAT2/STAT5A/LEPR/BCL2L1/CBLC/IL6R/IL2RB/STAT1/PIK3R3/CLCF1/JAK3/IFNGR1/SOCS4/IFNGR2/IL12RB2/IL11/IL4R/IL23A/SPRED1/PIM1/CCND1/SOCS3/SOCS2/PIK3R1/SPRY2/SPRY4/MYC	32	36.3636	VUB13del18q -SALL3OE
WP_CANONICAL_AND_NONCANONICAL_NOTCH_SIGNALING	24	-0.607555	-1.67061	0.00557483	0.0459934	0.037565	2520	tags=33%, list=17%, signal=28%	NOTCH1/JAG2/PSEN1/RRAS/JAG1/LEF1/DLL1/HES1	8	33.3333	VUB13del18q -SALL3OE
WP_TGFBETA_RECEPTOR_SIGNALING_IN_SKELETAL_DYSPLASIAS	50	-0.48092	-1.57097	0.0055316	0.0459934	0.037565	2192	tags=32%, list=15%, signal=27%	SMAD3/LTBP3/BAMBI/TFE3/STAT1/INHBA/TGIF1/FST/SERPINE1/JUN/TGFB1/LEF1/TGFBR2/THBS1/SMAD7/FOS	16	32	VUB13del18q -SALL3OE
WP_MODULATORS_OF_TCR_SIGNALING_AND_T_CELL_ACTIVATION	49	-0.481589	-1.55754	0.0156906	0.090563	0.0739671	3018	tags=39%, list=20%, signal=31%	MAP4K1/SMARCB1/TMEM222/RNF7/AKT1/CUL5/RASA2/TRAF6/LCK/NFKBIA/MEF2D/BCL10/RHOH/ITK/TNFAIP3/MAP3K14/PIK3R1/ZFP36L1/SH2B3	19	38.7755	VUB13del18q -SALL3OE
WP_WNT_SIGNALING_PATHWAY_AND_PLURIPOTENCY	87	-0.4252	-1.51549	0.00550055	0.0459934	0.037565	2589	tags=31%, list=17%, signal=26%	FZD10/PPM1J/FZD5/CCND2/CTBP1/WNT9B/CSNK1E/NKD1/SOX2/MAPK10/PRKCG/FRAT1/PRKCD/PRKCH/TCF7/PRKCB/FZD6/NANOG/FOXD3/FZD7/JUN/FOSL1/LEF1/CCND1/AXIN2/MYC/WNT3	27	31.0345	VUB13del18q -SALL3OE
WP_BURN_WOUND_HEALING	72	-0.436874	-1.51429	0.00948118	0.065092	0.0531637	3581	tags=36%, list=24%, signal=28%	TIMP1/LGALS1/NOD1/IL15/TPT1/XIST/CXCR2/CNN2/MIAT/AKT1/ACHE/SMAD3/NFKBIA/MYD88/ICAM1/LIN28A/INHBA/FST/CD248/VEGFA/TNFAIP3/KDR/FGFR1/FGFR3/FGFR2/SFRP2	26	36.1111	VUB13del18q -SALL3OE
WP_WNT_SIGNALING_PATHWAY_AND_PLURIPOTENCY	88	0.409258	1.39783	0.0209872	0.194535	0.173336	3149	tags=31%, list=20%, signal=25%	AXIN2/PPP2CA/CCND1/JUN/LEF1/TCF7/WNT3/FOXD3/POU5F1/FOSL1/RHOA/MAPK10/MYC/FZD10/NFYA/EP300/PPP2CB/ZBTB33/PRKCD/APC/PRKCZ/PPP2R3B/WNT9B/PRKCB/FRAT1/CTBP1/FZD7	27	30.6818	VUB13del18q
KEGG_JAK_STAT_SIGNALING_PATHWAY	86	0.458097	1.46685	0.0115507	0.0877851	0.0712878	3197	tags=34%, list=21%, signal=27%	CCND1/SPRY4/IL4R/SPRED1/IFNGR2/SOCS3/SPRY2/STAT3/MYC/SOCS4/LIF/BCL2L1/IL6ST/IL2RB/SPRY1/STAT6/IFNGR1/IL12RB2/SOCS5/PTPN11/CCND3/EP300/IRF9/CREBBP/PIK3R1/PRLR/IL6/CNTF/CISH	29	33.7209	hESCWT-SALL3KD
WP_BURN_WOUND_HEALING	78	0.446144	1.48958	0.01088	0.145498	0.129642	2573	tags=31%, list=17%, signal=26%	CNN2/CD248/VEGFA/ACHE/CASP3/IL15/TNFAIP3/LIN28A/FGFR2/TIMP1/COL1A1/SERPINH1/NFKBIA/SMAD3/IL6/CXCR2/LGALS1/TAGLN/MYD88/CXCR4/EGF/FGFR3/SFRP2/INHBA	24	30.7692	VUB13del18q
WP_CARDIAC_PROGENITOR_DIFFERENTIATION	36	0.534633	1.55024	0.0289919	0.243848	0.217274	4399	tags=56%, list=28%, signal=40%	PDGFRA/TGFB1/POU5F1/LIN28A/THY1/NOTCH1/NODAL/CXCR4/INHBA/FGF2/SOX1/SCN5A/BMP4/IGF2/LIN28B/BMP1/ZFP42/TNNT2/NANOG/TNNI3	20	55.5556	VUB13del18q
WP_CANONICAL_AND_NONCANONICAL_NOTCH_SIGNALING	24	0.630063	1.61024	0.0132008	0.0972546	0.0789777	2373	tags=42%, list=15%, signal=35%	LEF1/HES1/JAG1/CHUK/DLK1/MAML1/NOTCH4/PSEN2/NOTCH1/PSEN1	10	41.6667	hESCWT-SALL3KD
WP_HAIR_FOLLICLE_DEVELOPMENT_ORGANOGENESIS_PART_2_OF_3	28	0.586232	1.62306	0.0101678	0.145498	0.129642	1836	tags=39%, list=12%, signal=35%	PDGFRA/CCND1/LEF1/SNAI1/GTPBP4/FGFR2/CDH1/EDA/MYC/PDGFA/FGF1	11	39.2857	VUB13del18q
KEGG_JAK_STAT_SIGNALING_PATHWAY	88	0.479543	1.63789	0.00128611	0.0443545	0.039521	2705	tags=38%, list=17%, signal=31%	CCND1/SPRY4/SPRED1/IL11/SOCS4/LIF/IL15/IL4R/IFNGR2/SPRY2/PIM1/PIK3CA/IL23A/CLCF1/MYC/TSLP/IFNGR1/SOCS3/IL6/STAT6/STAM2/IL2RB/IL20RB/BCL2L1/PIK3R1/IL6R/EP300/IL12RB2/SOCS5/CNTF/IRF9/PIK3R5/CBLC	33	37.5	VUB13del18q
KEGG_CIRCADIAN_RHYTHM_MAMMAL	12	0.746915	1.64656	0.00876098	0.0744168	0.0604317	1481	tags=58%, list=10%, signal=53%	PER2/BHLHE40/NR1D1/BHLHE41/CSNK1D/PER1/CRY2	7	58.3333	hESCWT-SALL3KD
HALLMARK_TGF_BETA_SIGNALING	53	0.552235	1.65193	0.00253738	0.00906209	0.00476952	3419	tags=55%, list=22%, signal=43%	SERPINE1/TGFB1/JUNB/FNTA/KLF10/CTNNB1/IFNGR2/CDH1/THBS1/SMAD7/TJP1/WWTR1/SLC20A1/FURIN/SMAD3/UBE2D3/TGIF1/ID3/ARID4B/HDAC1/TRIM33/SMAD1/SMURF1/LEFTY2/PPP1CA/PMEPA1/RHOA/SKI/TGFBR1	29	54.717	hESCWT-SALL3KD
KEGG_CIRCADIAN_RHYTHM_MAMMAL	12	0.74892	1.67641	0.00542872	0.104226	0.0928677	816	tags=42%, list=5%, signal=40%	BHLHE40/PER2/BHLHE41/PER1/CSNK1D	5	41.6667	VUB13del18q
WP_ZINC_HOMEOSTASIS	26	0.644646	1.6804	0.00431568	0.0503705	0.0409044	2376	tags=42%, list=15%, signal=36%	SLC30A2/MT1E/MT1M/MTF1/MT1G/MT1H/SLC30A1/MT2A/SLC30A7/MT1F/SLC39A1	11	42.3077	hESCWT-SALL3KD
WP_CARDIAC_PROGENITOR_DIFFERENTIATION	36	0.60623	1.68663	0.00278273	0.0365648	0.0296933	2871	tags=39%, list=19%, signal=32%	TGFB1/LIN28A/INHBA/ZFP42/THY1/LIN28B/PDGFRA/NODAL/CXCR4/NOTCH1/SOX1/NANOG/ACTC1/TNNT2	14	38.8889	hESCWT-SALL3KD
WP_MODULATORS_OF_TCR_SIGNALING_AND_T_CELL_ACTIVATION	50	0.547499	1.6972	0.00211678	0.063768	0.0568188	2457	tags=36%, list=16%, signal=30%	MAP3K14/ZFP36L1/SH2B3/BCL10/RPRD1B/TNFAIP3/IKBKG/MEF2D/ITK/RNF7/NFKBIA/MAP4K1/VAV1/RASA2/PIK3R1/RHOH/DGKZ/CUL5	18	36	VUB13del18q
WP_BURN_WOUND_HEALING	80	0.540962	1.73333	0.000414381	0.0106851	0.00867708	3980	tags=39%, list=26%, signal=29%	CASP3/MYD88/CNN2/LIN28A/INHBA/CD248/TNFAIP3/FST/ACHE/HMGB1/FGFR1/TLR4/TAGLN/SMAD3/SFRP2/CXCR4/TIMP2/CXCL14/SNHG20/TGFB3/IL6/ACTA1/FGFR2/TPT1/COL1A2/COL1A1/TLR3/SNAI2/CXCL1/MIAT/IL15	31	38.75	hESCWT-SALL3KD
HALLMARK_IL6_JAK_STAT3_SIGNALING	59	0.543413	1.74808	0.000541772	0.00451477	0.00285143	2698	tags=34%, list=17%, signal=28%	TNFRSF12A/PLA2G2A/JUN/TGFB1/HMOX1/IL4R/IFNGR2/PIM1/CD38/LTBR/IFNGR1/SOCS3/IL6/STAM2/MYD88/CD9/PF4/IRF9/PIK3R5/BAK1	20	33.8983	VUB13del18q
WP_WNT_SIGNALING_PATHWAY_AND_PLURIPOTENCY	88	0.544635	1.75964	0.000129167	0.00617997	0.00501858	2579	tags=33%, list=17%, signal=28%	JUN/CCND1/LEF1/CTNNB1/MAP2K4/TCF7/PPP2CA/LDLR/FOSL1/MYC/WNT3/CTBP2/PLAU/FOXD3/FZD6/FZD7/NFYA/PPP2CB/PPP2R1B/ZBTB33/PRKCD/CTNND1/CTBP1/FZD5/CCND3/PAFAH1B1/EP300/NANOG/PPP2R2B	29	32.9545	hESCWT-SALL3KD
WP_ZINC_HOMEOSTASIS	26	0.648299	1.76414	0.00343397	0.0954907	0.0850845	1090	tags=35%, list=7%, signal=32%	SLC30A1/MT1M/MT1F/MT1E/MT2A/MT1G/MT1X/MT1H/SLC30A2	9	34.6154	VUB13del18q
HALLMARK_IL6_JAK_STAT3_SIGNALING	59	0.591306	1.7911	0.00010227	0.000511351	0.000269132	2208	tags=34%, list=14%, signal=29%	JUN/TNFRSF12A/TGFB1/IL4R/HMOX1/MYD88/IFNGR2/SOCS3/STAT3/A2M/IL6ST/PTPN2/IL17RA/PTPN1/IFNGR1/BAK1/TNFRSF1A/LTBR/IL1R1/PTPN11	20	33.8983	hESCWT-SALL3KD
WP_CANONICAL_AND_NONCANONICAL_NOTCH_SIGNALING	24	0.676711	1.80856	0.000973102	0.0424626	0.0378352	2034	tags=33%, list=13%, signal=29%	HES1/LEF1/DLL1/DLK1/JAG1/JAG2/PSEN1/NOTCH1	8	33.3333	VUB13del18q
WP_MODULATORS_OF_TCR_SIGNALING_AND_T_CELL_ACTIVATION	50	0.619732	1.81785	0.000136952	0.00617997	0.00501858	2244	tags=32%, list=15%, signal=27%	ZFP36L1/MAP3K14/RPRD1B/SH2B3/RHOH/TRAF6/RASA2/CUL5/TNFAIP3/BCL10/CHUK/ITK/PCBP2/IKBKG/TMEM222/SMARCB1	16	32	hESCWT-SALL3KD
WP_TGFBETA_RECEPTOR_SIGNALING_IN_SKELETAL_DYSPLASIAS	53	0.591046	1.84393	0.000159809	0.0182113	0.0162267	2573	tags=34%, list=17%, signal=28%	FOS/JUN/LEF1/SERPINE1/THBS1/TGFB1/SMAD7/TFE3/SMAD5/LIF/TGFBR2/SKIL/SMAD3/EP300/FOXH1/EGF/LEFTY1/INHBA	18	33.9623	VUB13del18q
WP_HAIR_FOLLICLE_DEVELOPMENT_ORGANOGENESIS_PART_2_OF_3	28	0.702215	1.85397	0.000453155	0.0109059	0.0088564	1486	tags=32%, list=10%, signal=29%	CCND1/LEF1/GTPBP4/CTNNB1/INHBA/MYC/CDH1/PDGFRA/SNAI1	9	32.1429	hESCWT-SALL3KD
WP_TGFBETA_RECEPTOR_SIGNALING_IN_SKELETAL_DYSPLASIAS	53	0.645503	1.919	3.93e-05	0.00282717	0.00229587	3554	tags=55%, list=23%, signal=42%	JUN/LEF1/SERPINE1/TGFB1/FOS/TGFBR2/CTNNB1/INHBA/STAT3/THBS1/SMAD7/LIF/FST/SMAD3/TGIF1/LEFTY1/TFE3/EP300/ZNF423/SMAD1/TGFBR3/CREBBP/SMAD5/ZFYVE9/LEFTY2/SKI/TGFBR1/STAT1/RUNX3	29	54.717	hESCWT-SALL3KD
HALLMARK_TGF_BETA_SIGNALING	53	0.633292	2.0059	8.7658e-06	0.000109573	6.92037e-05	1622	tags=36%, list=10%, signal=32%	KLF10/JUNB/PPP1R15A/SERPINE1/THBS1/TGFB1/SMAD7/SMURF1/FURIN/FNTA/ARID4B/RHOA/IFNGR2/WWTR1/CDH1/SKIL/SMAD3/TJP1/CDKN1C	19	35.8491	VUB13del18q
HALLMARK_TNFA_SIGNALING_VIA_NFKB	168	0.637642	2.22567	1e-10	2.5e-09	1.31579e-09	2359	tags=46%, list=15%, signal=39%	DUSP5/JUN/MCL1/CCND1/IER2/BHLHE40/SERPINE1/PHLDA1/FOS/TRIB1/DUSP4/GADD45B/SERPINB8/JUNB/PHLDA2/KLF10/HES1/MAFF/EGR3/DUSP2/INHBA/IFNGR2/SOCS3/RHOB/LDLR/FJX1/PDE4B/FOSL1/ZFP36/NFKBIE/MYC/EGR1/FOSL2/SLC2A3/YRDC/SQSTM1/PLAU/MXD1/EGR2/PFKFB3/PLAUR/TNFAIP3/PER1/LIF/SDC4/JAG1/EFNA1/IL6ST/IER5/PLK2/FUT4/SLC2A6/CCN1/ABCA1/F3/KLF6/ETS2/ZC3H12A/CCNL1/SPHK1/IER3/EIF1/RNF19B/GADD45A/SMAD3/TGIF1/DUSP1/RELB/B4G…	77	45.8333	hESCWT-SALL3KD
HALLMARK_TNFA_SIGNALING_VIA_NFKB	169	0.680669	2.54314	1e-10	5e-09	3.15789e-09	1677	tags=42%, list=11%, signal=38%	KLF10/EGR3/EGR2/IER2/MCL1/FOS/BHLHE40/FOSB/HES1/RHOB/EGR1/JUNB/DUSP5/CCND1/JUN/KLF6/PPP1R15A/F3/GADD45B/MAFF/DUSP2/EFNA1/SERPINE1/YRDC/ZFP36/IER3/PNRC1/TRIB1/PHLDA2/EIF1/NFE2L2/DUSP4/PHLDA1/PFKFB3/HBEGF/DUSP1/SQSTM1/VEGFA/FOSL2/CCN1/F2RL1/JAG1/PER1/PDE4B/LIF/TNFAIP3/FOSL1/IFNGR2/SDC4/IL23A/GFPT2/KLF9/TIPARP/ZC3H12A/CLCF1/MYC/SPHK1/NR4A3/SERPINB8/FUT4/SOCS3/NFKBIA/MXD1/SMAD3/IL6/NR4A1/GCH1/SLC2A3/…	71	42.0118	VUB13del18q
